# Supplementary material for: Peer review of the pesticide risk assessment of the active substance mepanipyrim
Source: PubMed Central journal article supplement (PMC7010127; doi:10.2903/j.efsa.2017.4852), 2017-06-13
Supplement: EFS2-15-e04852-s001.pdf [file EFS2-15-e04852-s001.pdf]

Appendix to:

EFSA (European Food Safety Authority), 2017. Conclusion on the peer review of the pesticide risk assessment of the active substance mepanipyrim. EFSA Journal 2017;15(6):4852, 80 pp. doi:10.2903/j.efsa.2017.4852

© European Food Safety Authority, 2017

### Identity, Physical and Chemical Properties, Details of Uses, Further Information (Regulation (EU) N° 283/2013, Annex Part A, points 1.3 and 3.2)

|                                    |             |
|------------------------------------|-------------|
| Active substance (ISO Common Name) | Mepanipyrim |
| Function ( <i>e.g.</i> fungicide)  | Fungicide   |
| Rapporteur Member State            | Belgium     |
| Co-rapporteur Member State         | Greece      |

### Identity (Regulation (EU) N° 283/2013, Annex Part A, point 1)

|                                                                                                                                           |                                                                                      |
|-------------------------------------------------------------------------------------------------------------------------------------------|--------------------------------------------------------------------------------------|
| Chemical name (IUPAC)                                                                                                                     | <i>N</i> -(4-methyl-6-prop-1-ynylpyrimidin-2-yl)aniline                              |
| Chemical name (CA)                                                                                                                        | 4-methyl- <i>N</i> -phenyl-6-(1-propynyl)-2-pyrimidinamine                           |
| CIPAC No                                                                                                                                  | 611                                                                                  |
| CAS No                                                                                                                                    | 110235-47-7                                                                          |
| EC No (EINECS or ELINCS)                                                                                                                  | 600-951-7                                                                            |
| FAO Specification (including year of publication)                                                                                         | No FAO specifications exist for mepanipyrim                                          |
| Minimum purity of the active substance as manufactured                                                                                    | 970 g/kg                                                                             |
| Identity of relevant impurities (of toxicological, ecotoxicological and/or environmental concern) in the active substance as manufactured | Toluene (max. 5 g/kg). Open for two impurities.                                      |
| Molecular formula                                                                                                                         | C <sub>14</sub> H <sub>13</sub> N <sub>3</sub>                                       |
| Molar mass                                                                                                                                | 223.3 g/mol                                                                          |
| Structural formula                                                                                                                        | 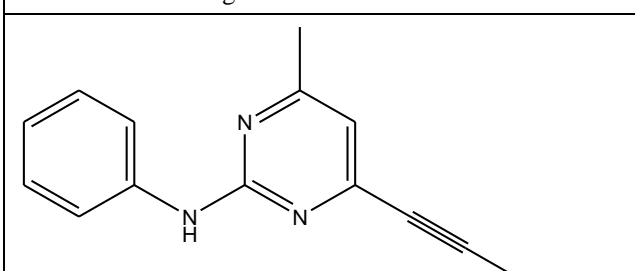 |

**Physical and chemical properties (Regulation (EU) N° 283/2013, Annex Part A, point 2)**

|                                                                     |                                                                                                                                                                                                                                                                                 |
|---------------------------------------------------------------------|---------------------------------------------------------------------------------------------------------------------------------------------------------------------------------------------------------------------------------------------------------------------------------|
| Melting point (state purity)                                        | 132.8 °C (99.7% )                                                                                                                                                                                                                                                               |
| Boiling point (state purity)                                        | Boiling point not determined because of decomposition                                                                                                                                                                                                                           |
| Temperature of decomposition (state purity)                         | Decomposition at 288°C (99.99%)                                                                                                                                                                                                                                                 |
| Appearance (state purity)                                           | Pure grade (99.7%): powder; off-white/pale yellow; odourless<br>Technical grade (97.7%): powder; cream coloured; odourless                                                                                                                                                      |
| Vapour pressure (state temperature, state purity)                   | $2.32 \times 10^{-5}$ Pa at 25°C (99.7%)                                                                                                                                                                                                                                        |
| Henry's law constant (state temperature)                            | $1.67 \times 10^{-3}$ Pa m <sup>3</sup> mol <sup>-1</sup> (20 to 25°C)                                                                                                                                                                                                          |
| Solubility in water (state temperature, state purity and pH)        | Distilled water: $3.10 \times 10^{-3}$ g/L at 20°C (99.7%)<br>$4.6 \times 10^{-3}$ g/L at 20°C (pH 4) (99.7%)<br>$2.08 \times 10^{-3}$ g/L at 20°C (pH 7) (99.7%)<br>$1.94 \times 10^{-3}$ g/L at 20°C (pH 9) (99.7%)                                                           |
| Solubility in organic solvents (state temperature, state purity)    | acetone: 139 g/L at 20°C (99.7%)<br>methanol: 15.4 g/L at 20°C (99.7%)<br>ethyl acetate: 102 g/L at 20°C (99.7%)<br>toluene: 55.4 g/L at 20°C (99.7%)<br>dichloromethane: 277 g/L at 20°C (99.7%)<br>hexane: 2.06 g/L at 20°C (99.7%)<br>acetonitrile: 38.5 g/L at 20°C (98.7%) |
| Surface tension (state concentration and temperature, state purity) | 72.0 mN/m at 24°C (90 % saturated solution) (99.7%)                                                                                                                                                                                                                             |
| Partition coefficient (state temperature, pH and purity)            | log P <sub>OW</sub> = 3.28 at 20°C (pH range: 6.5 – 6.8) (99.7%)<br><br>log P <sub>ow</sub> = 3.18 (pH 4) (99.8%)<br>log P <sub>ow</sub> = 3.20 (pH 7) (99.8%)<br>log P <sub>ow</sub> = 3.19 (pH 9) (99.8%)                                                                     |
| Dissociation constant (state purity)                                | pK <sub>a</sub> = 2.7 at 18°C (99.5%)<br>Dissociation product is the protonated aniline nitrogen product                                                                                                                                                                        |

UV/VIS absorption (max.) incl.  $\epsilon$   
(state purity, pH)

|                       |                                                    |
|-----------------------|----------------------------------------------------|
| (99.7%)               |                                                    |
| Acidic solution:      |                                                    |
| $\lambda_{\max}$ (nm) | $\epsilon$ (L mol <sup>-1</sup> cm <sup>-1</sup> ) |
| 358                   | $5.02 \times 10^3$                                 |
| 278                   | $2.83 \times 10^4$                                 |
| Neutral solution :    |                                                    |
| $\lambda_{\max}$ (nm) | $\epsilon$ (L mol <sup>-1</sup> cm <sup>-1</sup> ) |
| 344                   | $3.17 \times 10^3$                                 |
| 287                   | $2.94 \times 10^4$                                 |
| Basic solution :      |                                                    |
| $\lambda_{\max}$ (nm) | $\epsilon$ (L mol <sup>-1</sup> cm <sup>-1</sup> ) |
| 344                   | $3.22 \times 10^3$                                 |
| 287                   | $2.98 \times 10^4$                                 |
| Not flammable         |                                                    |
| Not explosive         |                                                    |
| Not oxidising         |                                                    |

Flammability (state purity)

Explosive properties (state purity)

Oxidising properties (state purity)

**Summary of representative uses evaluated, for which all risk assessments needed to be completed (*mepanipyrin*)**  
 (Regulation (EU) N° 284/2013, Annex Part A, points 3, 4)

| Crop and/or situation (a) | Member State or Country            | Product name | F G or I (b) | Pests or Group of pests controlled (c)            | Preparation |                | Application                                                                                                                                                       |                                          |                    |                                    | Application rate per treatment |                    |                                                                                        | PHI (days) (m) | Remarks |
|---------------------------|------------------------------------|--------------|--------------|---------------------------------------------------|-------------|----------------|-------------------------------------------------------------------------------------------------------------------------------------------------------------------|------------------------------------------|--------------------|------------------------------------|--------------------------------|--------------------|----------------------------------------------------------------------------------------|----------------|---------|
|                           |                                    |              |              |                                                   | Type (d-f)  | Conc. a.s. (i) | method kind (f-h)                                                                                                                                                 | range of growth stages & season (j)      | number min-max (k) | Interval between application (min) | kg a.s./hL min-max (l)         | Water L/ha min-max | kg a.s./ha min-max (l)<br>a) max. rate per appl.<br>b) max. total rate per crop/season |                |         |
| Table and wine grapes     | CY, ES, FR, GR, IT, PT (S-EU zone) | Frupica      | F            | grey mould <i>Botryotinia fuckeliana</i> (BOTRCI) | WP          | 500 g/kg       | foliar spray applications, upward spraying tractor-mounted broadcast air-assisted sprayers hand-held knapsack sprayers, including motorized knapsack mist-blowers | BBCH 77-89 summer-autumn (01-Jun/15-Nov) | 1                  | n.a.                               | 0.05 – 0.6                     | 100-1000           | a) 0.5-0.6<br>b) 0.5-0.6                                                               | 21             | None    |
| Strawberries              | CY, ES, FR, GR, IT, PT (S-EU zone) | Frupica      | F            | grey mould <i>Botryotinia fuckeliana</i> (BOTRCI) | WP          | 500 g/kg       | foliar spray applications, downward spraying tractor-mounted ground boom sprayers hand-held knapsack sprayers                                                     | BBCH 60-89 spring-summer (15-Apr/15-Aug) | 1-2                | 7 days                             | 0.015 – 0.2                    | 200-2000           | a) 0.3-0.4<br>b) 0.6-0.8                                                               | 1              | None    |

| Crop and/or situation (a) | Member State or Country        | Product name | F G or I (b) | Pests or Group of pests controlled (c)            | Preparation |                | Application                                                                                                   |                                          |                    |                                    | Application rate per treatment |                    |                                                                                        | PHI (days) (m) | Remarks |
|---------------------------|--------------------------------|--------------|--------------|---------------------------------------------------|-------------|----------------|---------------------------------------------------------------------------------------------------------------|------------------------------------------|--------------------|------------------------------------|--------------------------------|--------------------|----------------------------------------------------------------------------------------|----------------|---------|
|                           |                                |              |              |                                                   | Type (d-f)  | Conc. a.s. (i) | method kind (f-h)                                                                                             | range of growth stages & season (j)      | number min-max (k) | Interval between application (min) | kg a.s./hL min-max (l)         | Water L/ha min-max | kg a.s./ha min-max (l)<br>a) max. rate per appl.<br>b) max. total rate per crop/season |                |         |
| Strawberries              | CY, ES, FR, IT, PT (S-EU zone) | Frupica      | G            | grey mould <i>Botryotinia fuckeliana</i> (BOTRCI) | WP          | 500 g/kg       | foliar spray applications, downward/upward spraying hand-held knapsack sprayers                               | BBCH 60-89 spring-summer (01-Mar/01-Oct) | 1-2                | 7 days                             | 0.015 – 0.2                    | 200-2000           | a) 0.3-0.4<br>b) 0.6-0.8                                                               | 1              | None    |
| Tomatoes                  | CY, ES, GR, IT (S-EU zone)     | Frupica      | F            | grey mould <i>Botryotinia fuckeliana</i> (BOTRCI) | WP          | 500 g/kg       | foliar spray applications, downward spraying tractor-mounted ground boom sprayers hand-held knapsack sprayers | BBCH 61-89 summer (01-Jun/15-Sep)        | 1-2                | 7 days                             | 0.05 – 0.2                     | 200-800            | a) 0.4<br>b) 0.8                                                                       | 1              | None    |
| Tomatoes                  | CY, ES, GR, IT (S-EU zone)     | Frupica      | G            | grey mould <i>Botryotinia fuckeliana</i> (BOTRCI) | WP          | 500 g/kg       | foliar spray applications, upward spraying hand-held knapsack sprayers                                        | BBCH 61-89 at any season (15-Feb/31-Dec) | 1-2                | 7 days                             | 0.04 – 0.2                     | 200-1000           | a) 0.4<br>b) 0.8                                                                       | 1              | None    |

|                                                                                                                                                                                                                                                                                                                                                                                                                                                                                                                                                                                                                         |                                                                                                                                                                                                                                                                                                                                                                                                                                                                                                                                                                                                                                                                                                                               |
|-------------------------------------------------------------------------------------------------------------------------------------------------------------------------------------------------------------------------------------------------------------------------------------------------------------------------------------------------------------------------------------------------------------------------------------------------------------------------------------------------------------------------------------------------------------------------------------------------------------------------|-------------------------------------------------------------------------------------------------------------------------------------------------------------------------------------------------------------------------------------------------------------------------------------------------------------------------------------------------------------------------------------------------------------------------------------------------------------------------------------------------------------------------------------------------------------------------------------------------------------------------------------------------------------------------------------------------------------------------------|
| <p>(a) For crops, the EU and Codex classifications (both) should be taken into account; where relevant, the use situation should be described (e.g. fumigation of a structure)</p> <p>(b) Outdoor or field use (F), greenhouse application (G) or indoor application (I)</p> <p>(c) e.g. biting and sucking insects, soil born insects, foliar fungi, weeds</p> <p>(d) e.g. wettable powder (WP), emulsifiable concentrate (EC), granule (GR)</p> <p>(e) CropLife International Technical Monograph no 2, 6th Edition. Revised May 2008. Catalogue of pesticide</p> <p>(f) All abbreviations used must be explained</p> | <p>(i) g/kg or g/L. Normally the rate should be given for the active substance (according to ISO) and not for the variant in order to compare the rate for same active substances used in different variants (e.g. fluoroxypyr). <b>In certain cases, where only one variant is synthesised, it is more appropriate to give the rate for the variant (e.g. benthialdicarb-isopropyl).</b></p> <p>(j) Growth stage range from first to last treatment (BBCH Monograph, Growth Stages of Plants, 1997, Blackwell, ISBN 3-8263-3152-4), including where relevant, information on season at time of application</p> <p>(k) Indicate the minimum and maximum number of applications possible under practical conditions of use</p> |
|-------------------------------------------------------------------------------------------------------------------------------------------------------------------------------------------------------------------------------------------------------------------------------------------------------------------------------------------------------------------------------------------------------------------------------------------------------------------------------------------------------------------------------------------------------------------------------------------------------------------------|-------------------------------------------------------------------------------------------------------------------------------------------------------------------------------------------------------------------------------------------------------------------------------------------------------------------------------------------------------------------------------------------------------------------------------------------------------------------------------------------------------------------------------------------------------------------------------------------------------------------------------------------------------------------------------------------------------------------------------|

|                                                                                                                                                                                                                                                   |                                                                                                                                                                                                                             |
|---------------------------------------------------------------------------------------------------------------------------------------------------------------------------------------------------------------------------------------------------|-----------------------------------------------------------------------------------------------------------------------------------------------------------------------------------------------------------------------------|
| <p>(g) Method, e.g. high volume spraying, low volume spraying, spreading, dusting, drench<br/>         (h) Kind, e.g. overall, broadcast, aerial spraying, row, individual plant, between the plant- type of equipment used must be indicated</p> | <p>(l) The values should be given in g or kg whatever gives the more manageable number (e.g. 200 kg/ha instead of 200 000 g/ha or 12.5 g/ha instead of 0.0125 kg/ha<br/>         (m) PHI - minimum pre-harvest interval</p> |
|---------------------------------------------------------------------------------------------------------------------------------------------------------------------------------------------------------------------------------------------------|-----------------------------------------------------------------------------------------------------------------------------------------------------------------------------------------------------------------------------|

**Summary of additional intended uses for which MRL applications have been made, that in addition to the uses above, have also been considered in the consumer risk assessment (name of active substance or the respective variant)**

**Regulation (EC) N° 1107/2009 Article 8.1(g)**

*Not applicable*

## Further information, Efficacy

### Effectiveness (Regulation (EU) N° 284/2013, Annex Part A, point 6.2)

Mepanipyrim containing products are used in agriculture as a fungicide in strawberry, grapes and tomato and are applied by foliar sprays.

The original authorizations of Frupica have been granted on the basis of a detailed biological dossier (1997).

It has been concluded that the formulation Frupica gave control of *Botryotinia fuckeliana* (BOTRCI) which was equivalent to the reference standards.

More detailed assessment will be performed for products authorization applications.

### Adverse effects on field crops (Regulation (EU) N° 284/2013, Annex Part A, point 6.4)

The original authorizations of Frupica have been granted on the basis of a detailed biological dossier (1997). It has

been concluded that the formulation Frupica had no detrimental adverse effects, nor adverse effects on the quality or on the transformation processes (wine-making) of the following crops: strawberry, grapevine, tomato.

More detailed assessment will be performed for products authorization applications.

### Observations on other undesirable or unintended side-effects (Regulation (EU) N° 284/2013, Annex Part A, point 6.5)

The original authorizations of Frupica have been granted on the basis of a detailed biological dossier (1997). It has

been concluded that the formulation Frupica had no detrimental adverse effects on beneficial arthropods (*Typhlodromus*, *Amblyseius*).

More detailed assessment will be performed for products authorization applications.

### Groundwater metabolites: Screening for biological activity (SANCO/221/2000-rev.10-final Step 3 a Stage 1)

Activity against target organism

| <i>Met1</i> | <i>Met2</i> | <i>Met3</i> | <i>Met4</i> | <i>Met5</i> | <i>Met6</i> |
|-------------|-------------|-------------|-------------|-------------|-------------|
| <i>no</i>   | <i>no</i>   | <i>no</i>   | <i>no</i>   | <i>no</i>   | <i>no</i>   |

Assessment not triggered since there are no relevant metabolisms in groundwater for mepanipyrim.

## Methods of Analysis

### Analytical methods for the active substance (Regulation (EU) N° 283/2013, Annex Part A, point 4.1 and Regulation (EU) N° 284/2013, Annex Part A, point 5.2)

|                                                     |                                                                                                       |
|-----------------------------------------------------|-------------------------------------------------------------------------------------------------------|
| Technical a.s. (analytical technique)               | HPLC-UV                                                                                               |
| Impurities in technical a.s. (analytical technique) | HPLC-UV<br>GC-HSS for determination of toluene in the technical material (LOQ = 0.03 % w/w)           |
| Plant protection product (analytical technique)     | HPLC-UV for the determination of mepanipyrim in the plant protection product<br>Toluene: GC headspace |

### Analytical methods for residues (Regulation (EU) N° 283/2013, Annex Part A, point 4.2 & point 7.4.2)

#### Residue definitions for monitoring purposes

|                         |                                |
|-------------------------|--------------------------------|
| Food of plant origin    | Mepanipyrim (fruit crops only) |
| Food of animal origin   | Not necessary                  |
| Soil                    | Mepanipyrim                    |
| Sediment                | Mepanipyrim                    |
| Water surface           | Mepanipyrim                    |
| drinking/ground         | Mepanipyrim                    |
| Air                     | Mepanipyrim                    |
| Body fluids and tissues | Mepanipyrim                    |

#### Monitoring/Enforcement methods

|                                                                                               |                                                                                                                                                                                                                                              |
|-----------------------------------------------------------------------------------------------|----------------------------------------------------------------------------------------------------------------------------------------------------------------------------------------------------------------------------------------------|
| Food/feed of plant origin (analytical technique and LOQ for methods for monitoring purposes)  | QuECHERS citrate multi-residue method (LC-MS/MS)<br>LOQ = 0.01 mg/kg (high water, acidic, dry)<br>(GC) LOQ = 0.01 mg/kg (oily)                                                                                                               |
| Food/feed of animal origin (analytical technique and LOQ for methods for monitoring purposes) | No method submitted: not necessary                                                                                                                                                                                                           |
| Soil (analytical technique and LOQ)                                                           | GC-MS (LOQ = 0.01 mg/kg , mepanipyrim)<br><br>LC-MS/MS (LOQ = 0.01 mg/kg) (mepanipyrim)                                                                                                                                                      |
| Water (analytical technique and LOQ)                                                          | Surface water:<br>GC-MS (DB-5) (LOQ = 0.1 µg/L for mepanipyrim)<br>Confirmatory technique: GC-MS (using another stationary phase (DB-1701))<br><br>Drinking water:<br>LC-MS/MS (LOQ = 0.05 µg/L for mepanipyrim)<br>Independently validated. |



|                                                        |                                                                                                                                                                    |
|--------------------------------------------------------|--------------------------------------------------------------------------------------------------------------------------------------------------------------------|
| Air (analytical technique and LOQ)                     | GC-MS (LOQ = 0.75 µg/m <sup>3</sup> for mepanipyrim)<br>Confirmatory technique not required since sufficient confirmatory methods are available for soil and water |
| Body fluids and tissues (analytical technique and LOQ) | Data gap                                                                                                                                                           |

**Classification and labelling with regard to physical and chemical data (Regulation (EU) N° 283/2013, Annex Part A, point 10)**

|                                                                                                                                                                                                |             |
|------------------------------------------------------------------------------------------------------------------------------------------------------------------------------------------------|-------------|
| Substance                                                                                                                                                                                      | Mepanipyrim |
| Harmonised classification according to Regulation (EC) No 1272/2008 and its Adaptations to Technical Process [Table 3.1 of Annex VI of Regulation (EC) No 1272/2008 as amended] <sup>1</sup> : | None        |
| Peer review proposal <sup>2</sup> for harmonised classification according to Regulation (EC) No 1272/2008:                                                                                     | None        |

<sup>1</sup> Regulation (EC) No 1272/2008 of the European Parliament and of the Council of 16 December 2008 on classification, labelling and packaging of substances and mixtures, amending and repealing Directives 67/548/EEC and 1999/45/EC, and amending Regulation (EC) No 1907/2006. OJ L 353, 31.12.2008, 1-1355.

<sup>2</sup> It should be noted that harmonised classification and labelling is formally proposed and decided in accordance with Regulation (EC) No 1272/2008. Proposals for classification made in the context of the evaluation procedure under Regulation (EC) No 1107/2009 are not formal proposals.

## Impact on Human and Animal Health

### Absorption, distribution, metabolism and excretion (toxicokinetics) (Regulation (EU) N° 283/2013, Annex Part A, point 5.1)

|                                                             |                                                                                                                                                                                                                                                                                                                                                                                                                                                      |
|-------------------------------------------------------------|------------------------------------------------------------------------------------------------------------------------------------------------------------------------------------------------------------------------------------------------------------------------------------------------------------------------------------------------------------------------------------------------------------------------------------------------------|
| Rate and extent of oral absorption/systemic bioavailability | Rapidly and extensively absorbed in rat (approximately 80% of the administered dose at 5 mg/kg, via faeces (55%) and urine (25%)). In bile duct cannulated rats 48 - 72 % of the dose in bile.                                                                                                                                                                                                                                                       |
| Toxicokinetics                                              | $T_{\max} = 6 \text{ h}$<br>$C_{\max} = 6.63 \text{ } \mu\text{g/mL}$<br>$\text{AUC} = 256.4 \text{ } \mu\text{g} \times \text{h} / \text{mL}$<br>$T_{1/2} (6 \text{ h} - 24 \text{ h}) = 9.95 \text{ hours}$ ;<br>$T_{1/2} (48 \text{ h} - 168 \text{ h}) = 89.5 \text{ hours}$                                                                                                                                                                     |
| Distribution                                                | Widely distributed (mainly in fat, liver, skin, kidney, adrenals, thyroid at 24 h, mainly in liver until 168 h)                                                                                                                                                                                                                                                                                                                                      |
| Potential for bioaccumulation                               | No evidence for bioaccumulation                                                                                                                                                                                                                                                                                                                                                                                                                      |
| Rate and extent of excretion                                | <p>Rapid, representing &gt;90% of the dose within 48 h (18-28% in urine and 65-73% in faeces, in major part via bile (21-78% in Study 4)). Complete at 168 h.</p> <p>Distribution and excretion are similar between 5 mg/kg and 500 mg/kg.</p> <p>Excretion through urine slightly delayed at high dose in relation to the low dose.</p> <p>Patterns of distribution and excretion are similar for unique and repeated doses.</p>                    |
| Metabolism in animals                                       | <p>Investigated in bile, urine, faeces extracts and plasma. Extensive in rats by hydroxylation of the phenyl ring and on the lateral chains of the pyrimidine ring. Further conjugation reactions lead to numerous sulphate, glucuronide and cysteine-glycine conjugates. Metabolite identification was considered sufficient. No sex-differences.</p> <p>Unchanged parent is a major compound in faeces (20-35%) after high dose administration</p> |
| <i>In vitro</i> metabolism                                  | Not performed – <i>In vitro</i> metabolism study is missing                                                                                                                                                                                                                                                                                                                                                                                          |
| Toxicologically relevant compounds (animals and plants)     | Mepanipyrim                                                                                                                                                                                                                                                                                                                                                                                                                                          |
| Toxicologically relevant compounds (environment)            | Mepanipyrim                                                                                                                                                                                                                                                                                                                                                                                                                                          |

### Acute toxicity (Regulation (EU) N° 283/2013, Annex Part A, point 5.2)

|                                  |                 |  |
|----------------------------------|-----------------|--|
| Rat, mouse LD <sub>50</sub> oral | > 5000 mg/kg bw |  |
| Rat LD <sub>50</sub> dermal      | > 2000 mg/kg bw |  |

|                                 |                                                                             |  |
|---------------------------------|-----------------------------------------------------------------------------|--|
| Rat LC <sub>50</sub> inhalation | > 0.59 mg/L air /4h ( <i>nose only</i> )                                    |  |
| Skin irritation                 | Non-irritant                                                                |  |
| Eye irritation                  | Non-irritant                                                                |  |
| Skin sensitisation              | Non-sensitising ( <i>Magnusson-Kligman</i> )                                |  |
| Phototoxicity                   | Phototoxic <i>in vitro</i> – No phototoxicity data <i>in vivo</i> available |  |

### Short-term toxicity (Regulation (EU) N° 283/2013, Annex Part A, point 5.3)

|                                |                                                                                                                                                                                                                                                                                |  |
|--------------------------------|--------------------------------------------------------------------------------------------------------------------------------------------------------------------------------------------------------------------------------------------------------------------------------|--|
| Target organ / critical effect | <p><u>Rat</u>: hematology (↓MCHC, ↑neutrophils and ↓lymphocytes in ♂), and clinical chemistry findings (↑T. cholesterol, ↓triglyceride and ↓non-esterified fatty acid)</p> <p><u>Mouse</u>: liver (hypertrophy)</p> <p><u>Dog</u>: liver (hypertrophy), prostate (atrophy)</p> |  |
| Relevant oral NOAEL            | <p>90-day rat: 6.95 mg/kg bw per day</p> <p>90-day, dog: 7.5 mg/kg bw per day</p> <p>13-week, mouse: 19 mg/kg bw-per day</p> <p>52-week dog: 2.5 mg/kg bw per day</p>                                                                                                          |  |
| Relevant dermal NOAEL          | 28-day, rabbit: 300 mg/kg bw per day                                                                                                                                                                                                                                           |  |
| Relevant inhalation NOAEL      | No data - not required                                                                                                                                                                                                                                                         |  |

### Genotoxicity (Regulation (EU) N° 283/2013, Annex Part A, point 5.4)

|                            |                                                                                                                                                                                                                                                                                                                                                                                         |  |
|----------------------------|-----------------------------------------------------------------------------------------------------------------------------------------------------------------------------------------------------------------------------------------------------------------------------------------------------------------------------------------------------------------------------------------|--|
| <i>In vitro</i> studies    | <p>Ames reverse gene mutation assay: negative</p> <p>Gene mutation test: negative</p> <p>DNA damage and repair: negative</p> <p><i>In-vitro</i> chromosome aberration assay:</p> <ul style="list-style-type: none"> <li>-Main test : positive w/o S9 mix; negative with S9</li> <li>-Confirmatory test: negative w/o S9 mix</li> </ul> <p>Unscheduled DNA synthesis assay: negative</p> |  |
| <i>In vivo</i> studies     | <p>Micronucleus test, mouse bone marrow: negative</p> <p>Chromosome aberration, rat bone marrow: negative</p>                                                                                                                                                                                                                                                                           |  |
| Photomutagenicity          | Open considering the phototoxic potential                                                                                                                                                                                                                                                                                                                                               |  |
| Potential for genotoxicity | Mepanipyrin is unlikely to be genotoxic                                                                                                                                                                                                                                                                                                                                                 |  |

### Long-term toxicity and carcinogenicity (Regulation (EU) N°283/2013, Annex Part A, point 5.5)

|                                                  |                                                                                                                                                                                                                                                                      |                |
|--------------------------------------------------|----------------------------------------------------------------------------------------------------------------------------------------------------------------------------------------------------------------------------------------------------------------------|----------------|
| Long-term effects (target organ/critical effect) | <u>Rat:</u><br>-Target organs: liver (main), kidneys, parathyroid, pancreas.<br>-Critical effect: pancreas atrophy<br><u>Mouse:</u><br>-Target organ: Liver (hypertrophy)<br>-Critical effects: ↓MCV, ↑Plt, ↑liver weight, ↑hyperplastic foci, ↑hepatocyte swelling. |                |
| Relevant long-term NOAEL                         | <u>Rat (2-year):</u> <2.45 mg/kg bw per day<br><u>Mouse (18-month):</u> 56.0 mg/kg b.w per day                                                                                                                                                                       |                |
| Carcinogenicity (target organ, tumour type)      | <u>Rat:</u> benign liver tumours (adenomas, cystadenoma) and uterine adenocarcinoma (in the limits of HCV)<br><u>Mouse:</u> liver adenomas and carcinomas                                                                                                            | Cat. 2<br>H351 |
| Relevant NOAEL for carcinogenicity               | <u>Rat (2-year):</u> 7.3 mg/kg bw per day;<br><u>Mouse (18-month):</u> 56.0 mg/kg bw per day                                                                                                                                                                         |                |

### Reproductive toxicity (Regulation (EU) N° 283/2013, Annex Part A, point 5.6)

#### Reproduction toxicity

|                                       |                                                                                                                                                                                                                                                                                                              |  |
|---------------------------------------|--------------------------------------------------------------------------------------------------------------------------------------------------------------------------------------------------------------------------------------------------------------------------------------------------------------|--|
| Reproduction target / critical effect | <u>Parental toxicity:</u> liver; increased incidence of hepatocytic fatty vacuolation.<br><u>Reproductive toxicity:</u> ↓implantation sites, ↓litter size (study 1), fertility index decrease in rat (study 2).<br><u>Offspring's toxicity:</u> Liver, increased incidence of hepatocytic fatty vacuolation. |  |
| Relevant parental NOAEL               | <2.45 mg/kg bw per day                                                                                                                                                                                                                                                                                       |  |
| Relevant reproductive NOAEL           | 46 mg/kg bw per day                                                                                                                                                                                                                                                                                          |  |
| Relevant offspring NOAEL              | <2.45 mg/kg bw per day                                                                                                                                                                                                                                                                                       |  |

#### Developmental toxicity

|                                        |                                                                                                                                                                                                                                                    |  |
|----------------------------------------|----------------------------------------------------------------------------------------------------------------------------------------------------------------------------------------------------------------------------------------------------|--|
| Developmental target / critical effect | <u>Rat:</u><br>Maternal toxicity: ↓ body weight<br>Developmental toxicity: ↑ hind-limb intramuscular haemorrhage<br><u>Rabbit:</u><br>Maternal toxicity: few faeces in under-tray<br>Developmental toxicity: ↑resorptions, ↑post-implantation loss |  |
| Relevant maternal NOAEL                | Rat: 150 mg/kg bw per day<br>Rabbit: 10 mg/kg bw per day                                                                                                                                                                                           |  |
| Relevant developmental NOAEL           | Rat: 150 mg/kg bw per day<br>Rabbit: 10 mg/kg bw per day                                                                                                                                                                                           |  |

**Neurotoxicity (Regulation (EU) N° 283/2013, Annex Part A, point 5.7)**

|                                                                              |                                                                                                                                         |  |
|------------------------------------------------------------------------------|-----------------------------------------------------------------------------------------------------------------------------------------|--|
| Acute neurotoxicity                                                          | Neurotoxicity NOAEL: 80 mg/kg<br>Neurotoxicity LOAEL: 400 mg/kg, based on lower rearing / activity counts<br>Systemic NOAEL: 2000 mg/kg |  |
| Repeated neurotoxicity                                                       | Repeated neurotoxicity studies and additional studies were not submitted as not considered necessary                                    |  |
| Additional studies (e.g. delayed neurotoxicity, developmental neurotoxicity) | Developmental neurotoxicity studies were not submitted as not considered necessary                                                      |  |

**Other toxicological studies (Regulation (EU) N° 283/2013, Annex Part A, point 5.8)**

Supplementary studies on the active substance

**MoA studies regarding carcinogenicity**

Six investigative toxicology studies were conducted on Mepanipyrim to elucidate the mode of action (MoA) of liver tumour formation in rats and mice.

The potential of Mepanipyrim to induce hepatic microsomal metabolising enzymes and hepatocellular proliferation was investigated. The hepatic PCNA (proliferating cell nuclear antigen) index was raised and there was immuno-histochemical evidence of induction of cytochrome P450 isoforms (♂ only), and proliferation of SER following single doses (5000 mg/kg bw) and repeated doses for seven days (2000 mg/kg bw) when administered to rats by gavage. Similar effects were seen in ♂ mice given single (5000 mg/kg bw) or seven daily (3000 mg/kg bw) oral doses by gavage.

Two short-term tests carried out to investigate the initiating and promoting activity in relation to the induction of liver cell tumours in rodents. An increase of liver weight and an increase of  $\gamma$ -GTP<sup>+</sup> foci in rodents receiving diet containing Mepanipyrim at the highest doses (5000 ppm in ♀ rats and 7000 ppm in ♂ mice). A weak increase of P-450 content was recorded in mice after dietary administration of Mepanipyrim at 350 and 7000 ppm for 13 weeks.

Two studies examined the effect of Mepanipyrim on hepatic enzyme parameters after dietary administration to Fischer 344 rats and on B<sub>6</sub>C<sub>3</sub>F<sub>1</sub> mice for 4 weeks. These studies indicated that Mepanipyrim was not acting as a typical phenobarbital-type enzyme inducer, since it also showed some characteristics of a peroxisome proliferator. These effects were only observed at the high dose (highest tumourigenic dose level in the 2-year study). There was very limited hepatic enzyme induction at a dose level lower than the NOAEL for tumours.

**MoA studies regarding effects on lipid metabolism**

In publications of the open literature, notifier suggested that Mepanipyrim inhibits intracellular transport process of VLDL from the Golgi to the cell surface. Since the trans-Golgi apparatus regulates important general post-translational modifications of proteins, thereby directing its final destination, the finding is considered toxicologically relevant. A final MoA for the induction of fatty vacuolation in rat hepatocytes was not demonstrated. There was also no evidence that the effect would be of no concern for human health. Therefore, it should remain of potential toxicological relevance, and animal-derived NOAEL's are considered adequate for further risk assessment.

Endocrine disrupting properties

Prostate atrophy in the dogs (90d, 1 yr), uterine carcinoma in rats (2years), and decrease of the fertility index on the two generation study in rats, were noted.

A clear mechanism for the vague effects on prostate and uterus was absent, and the toxicological profile of mepanipyrim is indicative for RMS and co-RMS to consider the a.s. not an overt endocrine perturbator.

On the other hand, uterus was a target organ in the 2-year rat carcinogenicity study, including limited increase of uterus adenocarcinoma at 2000 ppm (1 case) and at 4000 ppm (2 cases).

As several effects are observed in the available studies, as sensitive endpoints like sexual maturation and sperm parameters have not been investigated, and the mechanistic information in the RAR is not sufficient, further clarification of the ED potential is needed using mechanistic data.

Studies performed on metabolites or impurities

Impurity I3

Acute, oral, rat: LD<sub>50</sub> = 836 mg/kg bw

M11

- Acute, oral, rat: LD<sub>50</sub>>5000 mg/kg b.w.
- Ames-test: positive in TA98 (+S9)
- Clastogenicity: positive in-vitro (CHL) ±S9; (equivocal ↑polyploid cells)
- UDS in-vivo (rat liver): negative
- Micronucleus in-vivo (mouse BM): negative
- Comet-assay in-vivo (hepatocytes): negative

M31 (identified in plant residues)

Acute, oral, rat: LD<sub>50</sub> >5000 mg/kg bw

Ames-test: negative

Genotoxicity covered by M11 due to structural similarity

QSAR data and repeated dose toxicity study are missing

M33 (identified in plant residues)

No studies available

Genotoxicity covered by M11 due to structural similarity

QSAR data and repeated dose toxicity study will be covered by M31

M36 (identified in plant residues)

Acute, oral, rat: LD<sub>50</sub> >5000 mg/kg bw

Ames-test: negative

Genotoxicity covered by M11 due to structural similarity

QSAR data and repeated dose toxicity study will be covered by M31

**Medical data (Regulation (EU) N° 283/2013, Annex Part A, point 5.9)**

Based on information from the manufacturing plants, as well as a review of published literature, it is concluded that there have been no reported incidents of mepanipyrim poisoning in humans.

**Summary<sup>1</sup> (Regulation (EU) N° 1107/2009, Annex II, point 3.1 and 3.6)**

|                                                  | Value<br>(mg/kg bw (per day)) | Study                                          | Uncertainty<br>factor |
|--------------------------------------------------|-------------------------------|------------------------------------------------|-----------------------|
| Acceptable Daily Intake (ADI)                    | 0.012 <sup>(1)</sup>          | LOAEL from the 2yr rat-study, and the 2G-study | 200 <sup>(4)</sup>    |
| Acute Reference Dose (ARfD)                      | 0.10 <sup>(2)</sup>           | rabbit, developmental                          | 100                   |
| Acceptable Operator Exposure Level (AOEL)        | 0.012 <sup>(3)</sup>          | LOAEL from the 2yr rat-study and the 2G-study  | 200 <sup>(4)</sup>    |
| Acute Acceptable Operator Exposure Level (AAOEL) | 0.10                          | rabbit, developmental                          | 100                   |

<sup>1</sup> Previously set ADI was 0.024 mg/kg bw per day

<sup>2</sup> Previously set ARfD was 0.30 mg/kg bw

<sup>3</sup> Previously set AOEL was 0.07 mg/kg bw per day (European Commission, 2004)

<sup>4</sup> An additional UF of 2 was used (further than the standard UF of 100) due to the use of LOAEL instead of the NOAEL

\* No correction for limited oral absorption/bioavailability (100 %).

**Dermal absorption (Regulation (EU) N° 284/2013, Annex Part A, point 7.3)**

Representative formulation (50% WP formulation  
in water-soluble bags)

Concentrate: 0.4%

Dilutions: 6% for low volume applications and 13% for  
high volume applications



## Exposure scenarios (Regulation (EU) N° 284/2013, Annex Part A, point 7.2)

Operators

| <b>German model (70 kg bw default)</b>                                                                                                                                              | <b>Level of PPE</b>                             | <b>% AOEL</b> |
|-------------------------------------------------------------------------------------------------------------------------------------------------------------------------------------|-------------------------------------------------|---------------|
| <b>strawberry or tomato; Tractor-mounted trailed boom sprayer outdoor</b><br><ul style="list-style-type: none"> <li>• 20 ha/day</li> <li>• Low spray volume<sup>1</sup></li> </ul>  | No gloves                                       | 127%          |
|                                                                                                                                                                                     | No gloves, coverall and sturdy footwear         | <b>40%</b>    |
|                                                                                                                                                                                     | Gloves, coverall and sturdy footwear            | <b>18%</b>    |
| <b>strawberry or tomato; Tractor-mounted trailed boom sprayer outdoor</b><br><ul style="list-style-type: none"> <li>• 20 ha/day</li> <li>• High spray volume<sup>2</sup></li> </ul> | No gloves                                       | 263%          |
|                                                                                                                                                                                     | No gloves, coverall and sturdy footwear         | <b>74%</b>    |
|                                                                                                                                                                                     | Gloves, coverall and sturdy footwear            | <b>28%</b>    |
| <b>strawberry or tomato; Hand-held knapsack outdoors</b><br><ul style="list-style-type: none"> <li>• 1 ha/day</li> <li>• Low spray volume<sup>1</sup></li> </ul>                    | No PPE                                          | 134%          |
|                                                                                                                                                                                     | No additional PPE, coverall and sturdy footwear | <b>67%</b>    |
|                                                                                                                                                                                     | PPE (gloves), coverall and sturdy footwear      | <b>37%</b>    |
| <b>Vines; Tractor-mounted broadcast air-assisted sprayer outdoors</b><br><ul style="list-style-type: none"> <li>• 8 ha/day</li> <li>• Low spray volume<sup>1</sup></li> </ul>       | No PPE                                          | 410%          |
|                                                                                                                                                                                     | No additional PPE, coverall and sturdy footwear | <b>98%</b>    |
|                                                                                                                                                                                     | PPE (gloves), coverall and sturdy footwear      | <b>73%</b>    |
| <b>Vines; Tractor-mounted broadcast air-assisted sprayer outdoors</b><br><ul style="list-style-type: none"> <li>• 8 ha/day</li> <li>• High spray volume<sup>2</sup></li> </ul>      | No PPE                                          | 870%          |
|                                                                                                                                                                                     | No additional PPE, coverall and sturdy footwear | 193%          |
|                                                                                                                                                                                     | PPE (gloves), coverall and sturdy footwear      | 141%          |
| <b>Vines; Hand-held knapsack application outdoors</b><br><ul style="list-style-type: none"> <li>• 1 ha/day</li> <li>• Low spray volume<sup>1</sup></li> </ul>                       | No PPE                                          | 202%          |
|                                                                                                                                                                                     | No additional PPE, coverall and sturdy footwear | <b>100%</b>   |
|                                                                                                                                                                                     | PPE (gloves), coverall and sturdy footwear      | <b>55%</b>    |

<sup>1</sup>:Low spray volume, DA=6%; <sup>2</sup>:high spray volume, DA=13%

| UK POEM model (60 kg b-w- default)                                                                                                                                                                                       | Level of PPE                                       | % AOEL |
|--------------------------------------------------------------------------------------------------------------------------------------------------------------------------------------------------------------------------|----------------------------------------------------|--------|
| <b>strawberry or tomato; Tractor-mounted trailed boom sprayer outdoor</b><br><ul style="list-style-type: none"> <li>• 50 ha/day<sup>3</sup>, 6 h/day<sup>3</sup></li> <li>• 200 L/ha</li> </ul>                          | No gloves                                          | 709%   |
|                                                                                                                                                                                                                          | Gloves during application                          | 124%   |
| <b>strawberry or tomato; Tractor-mounted trailed boom sprayer outdoor</b><br><ul style="list-style-type: none"> <li>• 50 ha/day<sup>3</sup>, 6 h/day<sup>3</sup></li> <li>• 1000 L/ha<sup>10</sup></li> <li>•</li> </ul> | No PPE                                             | 303%   |
|                                                                                                                                                                                                                          | Gloves during application                          | 50%    |
| <b>strawberry or tomato; Hand-held knapsack outdoors</b><br><ul style="list-style-type: none"> <li>• 1 ha/day<sup>4</sup>, 6 h/day<sup>4</sup></li> <li>• 2008 L/ha</li> <li>•</li> </ul>                                | No PPE                                             | 1733%  |
|                                                                                                                                                                                                                          | Gloves during application                          | 858%   |
| <b>Vines; Tractor-mounted broadcast air-assisted sprayer outdoors</b><br><ul style="list-style-type: none"> <li>• 15 ha/day<sup>3</sup>, 6 h/day<sup>3</sup></li> <li>• 100 L/ha<sup>8</sup></li> </ul>                  | No PPE                                             | 3813%  |
|                                                                                                                                                                                                                          | Gloves during application                          | 2463%  |
| <b>Vines; Tractor-mounted broadcast air-assisted sprayer outdoors</b><br><ul style="list-style-type: none"> <li>• 15 ha/day<sup>5</sup>, 6 h/day<sup>5</sup></li> <li>• 1000 L/ha<sup>11</sup></li> </ul>                | No PPE                                             | 1338%  |
|                                                                                                                                                                                                                          | Gloves during application                          | 948%   |
| <b>Vines; Hand-held knapsack application outdoors</b><br><ul style="list-style-type: none"> <li>• 1 ha/day<sup>4</sup>, 6 h/day<sup>4</sup></li> <li>• 1008 L/ha</li> </ul>                                              | No PPE                                             | 3763%  |
|                                                                                                                                                                                                                          | Gloves and impermeable coverall during application | 875%   |

<sup>3</sup> UK POEM default values for field crops tractor-mounted boom sprayer

<sup>4</sup> UK POEM default value for field crops hand-held knapsack sprayer

<sup>5</sup> Lower spray concentration using worst case 13% dermal absorption

#### Dutch Model<sup>1</sup>

**Hand-held knapsack application indoors to fruit and fruiting vegetable crops (strawberry or tomato)**  
*Application rate: 0.4 kg a.s./ha (using WP-SB)<sup>2</sup> with realistic low volume application*

|                                                                                                                        |                                 |             |
|------------------------------------------------------------------------------------------------------------------------|---------------------------------|-------------|
| <ul style="list-style-type: none"> <li>• 70 kg operator<sup>4</sup></li> <li>• Low spray volume<sup>5</sup></li> </ul> | No PPE                          | <b>618%</b> |
|                                                                                                                        | Additional PPE including Gloves | <b>105%</b> |

<sup>1</sup> No PPE (defined as operator wearing long sleeved shirt, long trousers (“permeable”) but no gloves)

<sup>2</sup> Water-Soluble Bags (WP-SB) cannot be considered during mixing and loading in the Dutch glasshouse model, therefore the actual exposures will be lower than estimated

<sup>3</sup> Dutch model default value for indoor application

<sup>4</sup> Dutch model default body weight

<sup>5</sup> 6% dermal absorption applied

Workers

**German model of worker re-entry**

| <b>Re-entry Scenario</b>                      |          | <b>% AOEL</b> |
|-----------------------------------------------|----------|---------------|
| Vine crops (grapes) – harvesting, 13% DA      | No PPE   | 576%          |
|                                               | With PPE | 115%          |
| Vine crops (grapes) – crop-inspection, 13% DA | No PPE   | 650%          |
|                                               | With PPE | 130%          |
| Tomato crops – harvesting, 13% DA             | No PPE   | 117%          |
|                                               | With PPE | 6%            |
| Strawberry crops – harvesting, 13% DA         | No PPE   | 468%          |
|                                               | With PPE | 23%           |

Bystanders  
and  
residents

## BYSTANDERS AND RESIDENTS

### BfR model for estimation of bystander and resident exposure to mepanipyrin

| Crop scenario                                                                                                    | Bystander or resident, adults or children |          | % AOEL (10m-drift) | %AOEL (3m-drift) |
|------------------------------------------------------------------------------------------------------------------|-------------------------------------------|----------|--------------------|------------------|
|                                                                                                                  |                                           |          |                    |                  |
| Tractor-mounted broadcast air-assisted sprayer application outdoors to vine crops (low volume)                   | Bystander                                 | adults   | 6.32%              | 40.27%           |
|                                                                                                                  |                                           | children | 5.15%              | 31.64%           |
|                                                                                                                  | Resident                                  | adults   | 2.75%              | 5.23%            |
|                                                                                                                  |                                           | children | 5.83%              | 14.37%           |
| Tractor-mounted broadcast air-assisted sprayer application outdoors to vine crops (high volume)                  | Bystander                                 | adults   | 13.49%             | 87.05%           |
|                                                                                                                  |                                           | children | 10.75%             | 68.14%           |
|                                                                                                                  | Resident                                  | adults   | 3.28%              | 8.64%            |
|                                                                                                                  |                                           | children | 6.53%              | 18.89%           |
| Hand-held knapsack sprayer application outdoors to vine crops (low volume)                                       | Bystander                                 | adults   | 6.50%              | 40.45%           |
|                                                                                                                  |                                           | children | 5.54%              | 32.03%           |
|                                                                                                                  | Resident                                  | adults   | 2.75%              | 5.23%            |
|                                                                                                                  |                                           | children | 5.83%              | 14.37%           |
| Tractor-mounted trailed boom sprayer application outdoors to low field crops (strawberry or tomato, low volume)  | Bystander                                 | adults   | 0.98%              |                  |
|                                                                                                                  |                                           | children | 0.78%              |                  |
|                                                                                                                  | Resident                                  | adults   | 2.42%              |                  |
|                                                                                                                  |                                           | children | 4.69%              |                  |
| Tractor-mounted trailed boom sprayer application outdoors to low field crops (strawberry or tomato, high volume) | Bystander                                 | adults   | 2.11%              |                  |
|                                                                                                                  |                                           | children | 1.67%              |                  |
|                                                                                                                  | Resident                                  | adults   | 2.56%              |                  |
|                                                                                                                  |                                           | children | 4.87%              |                  |
| Hand-held knapsack sprayer application outdoors to low field crops (strawberry or tomato, low volume)            | Bystander                                 | adults   | 1.20%              |                  |
|                                                                                                                  |                                           | children | 1.25%              |                  |
|                                                                                                                  | Resident                                  | adults   | 2.42%              |                  |
|                                                                                                                  |                                           | children | 4.69%              |                  |

The UK CRD model was also used giving in overall higher values

**Classification with regard to toxicological data (Regulation (EU) N° 283/2013, Annex Part A, Section 10)**

Substance :

Mepanipyrim

Harmonised classification according to Regulation (EC) No 1272/2008 and its Adaptations to Technical Process [Table 3.1 of Annex VI of Regulation (EC) No 1272/2008 as amended]<sup>4</sup> :

Carc. Cat. 2; H351

Peer review proposal<sup>5</sup> for harmonised classification according to Regulation (EC) No 1272/2008:

Carc. Cat. 2; H351

<sup>4</sup> Regulation (EC) No 1272/2008 of the European Parliament and of the Council of 16 December 2008 on classification, labelling and packaging of substances and mixtures, amending and repealing Directives 67/548/EEC and 1999/45/EC, and amending Regulation (EC) No 1907/2006. OJ L 353, 31.12.2008, 1-1355.

<sup>5</sup> It should be noted that harmonised classification and labelling is formally proposed and decided in accordance with Regulation (EC) No 1272/2008.

## Residues in or on treated products food and feed

## Metabolism in plants (Regulation (EU) N° 283/2013, Annex Part A, points 6.2.1, 6.5.1, 6.6.1 and 6.7.1)

|                                                                                                                                                                                                                                                                                                                                        |                                                                                                                                                                                                                                                                                                                                                    |                                              |                         |                                                                             |
|----------------------------------------------------------------------------------------------------------------------------------------------------------------------------------------------------------------------------------------------------------------------------------------------------------------------------------------|----------------------------------------------------------------------------------------------------------------------------------------------------------------------------------------------------------------------------------------------------------------------------------------------------------------------------------------------------|----------------------------------------------|-------------------------|-----------------------------------------------------------------------------|
| <b>Primary crops</b><br>(Plant groups covered)<br><b>OECD Guideline 501</b>                                                                                                                                                                                                                                                            | <b>Crop groups</b>                                                                                                                                                                                                                                                                                                                                 | <b>Crop(s)</b>                               | <b>Application(s)</b>   | <b>DAT (days)</b>                                                           |
|                                                                                                                                                                                                                                                                                                                                        | Fruit crops                                                                                                                                                                                                                                                                                                                                        | Grapes                                       | Foliar, 3x500 g a.s./ha | 30-32 DALA                                                                  |
|                                                                                                                                                                                                                                                                                                                                        |                                                                                                                                                                                                                                                                                                                                                    | Tomatoes                                     | Foliar, 3x500 g a.s./ha | 26 & 62 DALA                                                                |
|                                                                                                                                                                                                                                                                                                                                        |                                                                                                                                                                                                                                                                                                                                                    | Apples                                       | Foliar, 3x500 g a.s./ha | 15 & 31 DALA                                                                |
|                                                                                                                                                                                                                                                                                                                                        | Root crops                                                                                                                                                                                                                                                                                                                                         | -                                            | -                       | -                                                                           |
|                                                                                                                                                                                                                                                                                                                                        | Leafy crops                                                                                                                                                                                                                                                                                                                                        | -                                            | -                       | -                                                                           |
|                                                                                                                                                                                                                                                                                                                                        | Cereals/grass crops                                                                                                                                                                                                                                                                                                                                | -                                            | -                       | -                                                                           |
|                                                                                                                                                                                                                                                                                                                                        | Pulses/Oilseeds                                                                                                                                                                                                                                                                                                                                    | -                                            | -                       | -                                                                           |
| Miscellaneous                                                                                                                                                                                                                                                                                                                          | -                                                                                                                                                                                                                                                                                                                                                  | -                                            | -                       |                                                                             |
| Investigation conducted using radiolabelled [ <sup>14</sup> C-Aniline]-mepanipyrim or [ <sup>14</sup> C-Pyrimidine]-mepanipyrim;<br>Major residue component in fruits at final harvest: mepanipyrim (39-44% TRR grapes; 23-38% TRR tomatoes; 56-70% TRR apples);<br>Significant proportions of metabolite M-31 in grapes (20-30% TRR). |                                                                                                                                                                                                                                                                                                                                                    |                                              |                         |                                                                             |
| <b>Rotational crops</b><br>(metabolic pattern)<br><b>OECD Guideline 502</b>                                                                                                                                                                                                                                                            | <b>Crop groups</b>                                                                                                                                                                                                                                                                                                                                 | <b>Crop(s)</b>                               | <b>PBI (days)</b>       | <b>Comments</b>                                                             |
|                                                                                                                                                                                                                                                                                                                                        | Root/tuber crops                                                                                                                                                                                                                                                                                                                                   | Carrot                                       | 30,120,365              | 0.8 kg a.s./ha on bare soil (1N considering representative use on tomatoes) |
|                                                                                                                                                                                                                                                                                                                                        | Leafy crops                                                                                                                                                                                                                                                                                                                                        | Lettuce                                      | 30,120,365              |                                                                             |
|                                                                                                                                                                                                                                                                                                                                        | Cereal (small grain)                                                                                                                                                                                                                                                                                                                               | Wheat                                        | 30,120,365              |                                                                             |
| Other                                                                                                                                                                                                                                                                                                                                  | -                                                                                                                                                                                                                                                                                                                                                  | -                                            |                         |                                                                             |
| Rotational crop and primary crop metabolism similar?                                                                                                                                                                                                                                                                                   | Yes;<br>Major residue component in rotational crops (and soil): mepanipyrim;<br>Acidic metabolite (B-11) observed in wheat hay and straw (max. 13% TRR/0.083 mg/kg)                                                                                                                                                                                |                                              |                         |                                                                             |
| <b>Processed commodities</b><br>(standard hydrolysis study)<br><b>OECD Guideline 507</b>                                                                                                                                                                                                                                               | <b>Conditions</b>                                                                                                                                                                                                                                                                                                                                  | <b>Mepanipyrim (% applied radioactivity)</b> |                         |                                                                             |
|                                                                                                                                                                                                                                                                                                                                        | 20 min, 90°C, pH 4                                                                                                                                                                                                                                                                                                                                 | 102.0 +/- 2.5                                |                         |                                                                             |
|                                                                                                                                                                                                                                                                                                                                        | 60 min, 100°C, pH 5                                                                                                                                                                                                                                                                                                                                | 105.3 +/- 4.7                                |                         |                                                                             |
|                                                                                                                                                                                                                                                                                                                                        | 20 min, 120°C, pH 6                                                                                                                                                                                                                                                                                                                                | 99.7 +/- 1.2                                 |                         |                                                                             |
| Residue pattern in processed commodities similar to residue pattern in raw commodities?                                                                                                                                                                                                                                                | Yes;<br>Mepanipyrim is hydrolytically stable under processing conditions representative of pasteurisation, boiling and sterilisation.<br>For metabolite M31, stability under standard hydrolysis conditions representative of processing have to be demonstrated. For the time being the residue definition for processed commodities remains open |                                              |                         |                                                                             |
| Plant residue definition for monitoring (RD-Mo)<br><b>OECD Guidance, series on pesticides No 31</b>                                                                                                                                                                                                                                    | Mepanipyrim (fruit crops only)                                                                                                                                                                                                                                                                                                                     |                                              |                         |                                                                             |
| Plant residue definition for risk assessment (RD-RA)                                                                                                                                                                                                                                                                                   | Mepanipyrim and M-31 (free and conjugated)<br><i>(provisional: the way the residue definition will be expressed is pending the toxicity profile of M-31)</i>                                                                                                                                                                                       |                                              |                         |                                                                             |
| Conversion factor (monitoring to risk assessment)                                                                                                                                                                                                                                                                                      | -Table and wine grapes: 1.6<br>-Strawberries: 1.1<br>-Tomato: none                                                                                                                                                                                                                                                                                 |                                              |                         |                                                                             |

**Metabolism in livestock (Regulation (EU) N° 283/2013, Annex Part A, points 6.2.2, 6.2.3, 6.2.4, 6.2.5 6.7.1)**

| <b>OECD Guideline 503 and SANCO/11187/2013 rev. 3 (fish)</b>                                         | <b>Animal</b>                               | <b>Dose (mg/kg bw/d)</b> | <b>Duration (days)</b> | <b>N rate/comment</b> |
|------------------------------------------------------------------------------------------------------|---------------------------------------------|--------------------------|------------------------|-----------------------|
| <b>Animals covered</b>                                                                               | Laying hen                                  | -                        | -                      | -                     |
|                                                                                                      | Goat/Cow                                    | -                        | -                      | -                     |
|                                                                                                      | Pig                                         | -                        | -                      | -                     |
|                                                                                                      | Fish                                        | mg/kg DM                 | -                      | -                     |
|                                                                                                      | <i>No data available, no data required.</i> |                          |                        |                       |
| Time needed to reach a plateau concentration in milk and eggs (days)                                 | Not applicable                              |                          |                        |                       |
| Animal residue definition for monitoring (RD-Mo)<br><b>OECD Guidance, series on pesticides No 31</b> | Not applicable                              |                          |                        |                       |
| Animal residue definition for risk assessment (RD-RA)                                                | Not applicable                              |                          |                        |                       |
| Conversion factor (monitoring to risk assessment)                                                    | Not applicable                              |                          |                        |                       |
| Metabolism in rat and ruminant similar (Yes/No)                                                      | Not applicable                              |                          |                        |                       |
| Fat soluble residues (Yes/No)<br><b>(FAO, 2009)</b>                                                  | Not applicable                              |                          |                        |                       |

**Residues in succeeding crops (Regulation (EU) N° 283/2013, Annex Part A, point 6.6.2)**

|                                                                                             |                                                                                                                                                                                                                                             |
|---------------------------------------------------------------------------------------------|---------------------------------------------------------------------------------------------------------------------------------------------------------------------------------------------------------------------------------------------|
| <b>Confined rotational crop study</b><br>(Quantitative aspect)<br><b>OECD Guideline 502</b> | Confined rotational crop study conducted on carrot, lettuce and wheat (0.8 kg a.s./ha on bare soil):<br>Mepanipyrim residues >0.01 mg/kg in wheat straw (30 DAT) and carrot (root and foliage – 30 & 120 DAT).                              |
| <b>Field rotational crop study</b><br><b>OECD Guideline 504</b>                             | Limited field rotational crop study conducted on cabbage, parsnip/turnip and spinach (representative use tomatoes, i.e. 2x 400 g a.s./ha):<br>Minimal uptake of residues mepanipyrim observed (mepanipyrim <0.01 mg/kg in rotational crops) |

**Stability of residues (Regulation (EU) N° 283/2013, Annex Part A, point 6.1)**  
**OECD Guideline 506**

| Plant products<br>(Category)                                                                                                                                                                                                                                                                                                | Commodity                                 | T<br>(°C) | Stability (Months)     |      |   |   |
|-----------------------------------------------------------------------------------------------------------------------------------------------------------------------------------------------------------------------------------------------------------------------------------------------------------------------------|-------------------------------------------|-----------|------------------------|------|---|---|
|                                                                                                                                                                                                                                                                                                                             |                                           |           | mepanipyrim            | M31  |   |   |
| High water content                                                                                                                                                                                                                                                                                                          | Tomatoes,                                 | -20       | ≥ 18                   | ≥ 18 |   |   |
|                                                                                                                                                                                                                                                                                                                             | Spinach,                                  | -18       | ≥ 9                    | -    |   |   |
|                                                                                                                                                                                                                                                                                                                             | Cabbage head                              | -18       | ≥ 9                    | -    |   |   |
| High oil content                                                                                                                                                                                                                                                                                                            | -                                         | -         | -                      | -    |   |   |
| High protein content                                                                                                                                                                                                                                                                                                        | -                                         | -         | -                      | -    |   |   |
| High starch content                                                                                                                                                                                                                                                                                                         | Parsnip root                              | -18       | ≥ 9                    | -    |   |   |
| High acid content                                                                                                                                                                                                                                                                                                           | Grapes                                    | -20       | ≥ 16                   | ≥ 16 |   |   |
|                                                                                                                                                                                                                                                                                                                             | Strawberries                              | -         | ≥ 19                   | ≥ 18 |   |   |
| Processed products                                                                                                                                                                                                                                                                                                          | Tomato<br>juice/puree,<br>canned tomatoes | -20       | ≥ 18                   | ≥ 18 |   |   |
|                                                                                                                                                                                                                                                                                                                             | Strawberry jam                            | -20       | ≥ 18                   | ≥ 18 |   |   |
|                                                                                                                                                                                                                                                                                                                             | Grape juice,<br>raisins                   | -20       | ≥ 18                   | ≥ 18 |   |   |
|                                                                                                                                                                                                                                                                                                                             | Wine                                      | -20       | ≥ 15                   | ≥ 15 |   |   |
| Other                                                                                                                                                                                                                                                                                                                       | -                                         | -         | -                      | -    |   |   |
| Overall, residues of mepanipyrim are stable in tomatoes (high water content), strawberries and grapes (high acid content) and their processed products for at least 18 months when stored frozen. Frozen storage stability of mepanipyrim for at least 9 months was demonstrated in a high starch commodity (parsnip root). |                                           |           |                        |      |   |   |
| Animal                                                                                                                                                                                                                                                                                                                      | Animal<br>commodity                       | T<br>(°C) | Stability (Month/Year) |      |   |   |
|                                                                                                                                                                                                                                                                                                                             |                                           |           |                        |      |   |   |
| -                                                                                                                                                                                                                                                                                                                           | Muscle                                    |           | -                      | -    | - | - |
| -                                                                                                                                                                                                                                                                                                                           | Liver                                     |           | -                      | -    | - | - |
| -                                                                                                                                                                                                                                                                                                                           | Kidney                                    |           | -                      | -    | - | - |
| -                                                                                                                                                                                                                                                                                                                           | Milk                                      |           | -                      | -    | - | - |
| -                                                                                                                                                                                                                                                                                                                           | Egg                                       |           | -                      | -    | - | - |
| <i>No data available, no data required.</i>                                                                                                                                                                                                                                                                                 |                                           |           |                        |      |   |   |



**Summary of residues data from the supervised residue trials (Regulation (EU) N° 283/2013, Annex Part A, point 6.3) OECD Guideline 509, OECD Guidance, series on pesticides No 66 and OECD MRL calculator**

| Crop (cGAP)                                                                                                                                                                                     | Region/<br>Indoor<br>(a)  | Residue levels (mg/kg) observed in the supervised residue trials relevant to the supported GAPs (b)                                                                                                                                                                                                                                                                                                                               | Recommendations/comments (OECD calculations)                                                                                                                                                  | MRL proposals (mg/kg) | HR (mg/kg) (c)       | STMR (mg/kg) (d)     |   |                      |                      |
|-------------------------------------------------------------------------------------------------------------------------------------------------------------------------------------------------|---------------------------|-----------------------------------------------------------------------------------------------------------------------------------------------------------------------------------------------------------------------------------------------------------------------------------------------------------------------------------------------------------------------------------------------------------------------------------|-----------------------------------------------------------------------------------------------------------------------------------------------------------------------------------------------|-----------------------|----------------------|----------------------|---|----------------------|----------------------|
| <b>RD Monitoring (Mo): mepanipyrim</b>                                                                                                                                                          |                           |                                                                                                                                                                                                                                                                                                                                                                                                                                   |                                                                                                                                                                                               |                       |                      |                      |   |                      |                      |
| <b>RD Risk Assessment (RA) (provisional): mepanipyrim and M31 (free and conjugated),-expressed as mepanipyrim, combined or separately (pending the outcome on toxicological profile of M31)</b> |                           |                                                                                                                                                                                                                                                                                                                                                                                                                                   |                                                                                                                                                                                               |                       |                      |                      |   |                      |                      |
| <b>Grapes</b><br>(1 x 0.6 kg a.s./ha, PHI 21 days)                                                                                                                                              | NEU                       | Mo:<br>0.15, 0.16, 0.31, 0.40, 0.46, 0.53, 0.87, 0.92 <sup>(f)</sup> , 1.05, 1.16;<br>RA:<br>0.15, 0.16, 0.31, 0.40, 0.46, 0.53, 0.87, 0.92 <sup>(f)</sup> , 1.05, 1.16                                                                                                                                                                                                                                                           | NEU (n=10) and SEU (n=17) datasets were merged because statistically similar (Mann-Whitney U-test; $\alpha=0.05$ );<br><br>The MRL of 2 mg/kg is derived from merged datasets.                | 2                     | Mo: 1.16<br>RA: 1.16 | Mo: 0.50<br>RA: 0.50 |   |                      |                      |
|                                                                                                                                                                                                 | SEU                       | Mo:<br>0.06 <sup>(e)</sup> , 0.07, 0.10, 0.15, 0.18, 0.19, 0.21, 0.28, 0.54, 0.71, 0.85, 1.04, 1.11, 0.05, 0.18, 0.41, 0.67<br>RA:<br>0.09 <sup>(e)</sup> , 0.07, 0.11, 0.26, 0.19, 0.19, 0.23, 0.43, 0.55, 0.73, 0.86, 1.09, 1.25 <sup>(e)</sup> , 0.07, 0.18, 0.49, 0.73                                                                                                                                                        |                                                                                                                                                                                               |                       |                      |                      | 2 | Mo: 1.11<br>RA: 1.25 | Mo: 0.21<br>RA: 0.26 |
|                                                                                                                                                                                                 | NEU+SEU (merged datasets) | Mo:<br>0.05, 0.06 <sup>(e)</sup> , 0.07, 0.10, 0.15, 0.15, 0.16, 0.18, 0.18, 0.19, 0.21, 0.28, 0.31, 0.40, 0.41, 0.46, 0.53, 0.54, 0.67, 0.71, 0.85, 0.87, 0.92 <sup>(f)</sup> , 1.04, 1.05, 1.11, 1.16<br>RA:<br>0.07, 0.07, 0.09 <sup>(e)</sup> , 0.11, 0.15, 0.16, 0.18, 0.19, 0.19, 0.23, 0.26, 0.31, 0.40, 0.43, 0.48, 0.49, 0.53, 0.55, 0.73, 0.73, 0.86, 0.87, 0.92 <sup>(f)</sup> , 1.05, 1.09, 1.16, 1.25 <sup>(e)</sup> |                                                                                                                                                                                               |                       |                      |                      |   |                      |                      |
| <b>Strawberries</b><br>(1 x 0.8 kg a.s./ha; PHI 1 day; outdoor/indoor)                                                                                                                          | NEU                       | Mo:<br>0.11, 0.13, 0.27 <sup>(e)</sup> , 0.33 <sup>(e)</sup> , 0.36, 0.47, 0.54 <sup>(f)</sup> , 0.59<br>RA:<br>0.17, 0.17, 0.27 <sup>(e)</sup> , 0.35 <sup>(e)</sup> , 0.39, 0.50, 0.57 <sup>(f)</sup> , 0.65                                                                                                                                                                                                                    | Outdoor datasets (NEU and SEU – merged, because statistically similar according to Mann-Whitney U-test ( $\alpha=0.05$ )). The MRL proposal of 3 mg/kg derived from the indoor dataset (n=8). | 1.5                   | Mo: 0.59<br>RA: 0.65 | Mo: 0,35<br>RA: 0.37 |   |                      |                      |

| Crop (cGAP)                                                        | Region/<br>Indoor (a)     | Residue levels (mg/kg) observed in the supervised residue trials relevant to the supported GAPs (b)                                                                                                                                                                                                                                            | Recommendations/comments (OECD calculations)                                                                                                                                                                                                                                                                                                                                    | MRL proposals (mg/kg) | HR (mg/kg) (c)              | STMR (mg/kg) (d)            |
|--------------------------------------------------------------------|---------------------------|------------------------------------------------------------------------------------------------------------------------------------------------------------------------------------------------------------------------------------------------------------------------------------------------------------------------------------------------|---------------------------------------------------------------------------------------------------------------------------------------------------------------------------------------------------------------------------------------------------------------------------------------------------------------------------------------------------------------------------------|-----------------------|-----------------------------|-----------------------------|
|                                                                    | SEU                       | Mo:<br>2 x 0.19, 0.25, 0.51, 0.65, 0.74, 0.86 <sup>(f)</sup><br>RA:<br>2 x 0.19, 0.30, 0.62, 0.67, 0.96 <sup>(e)</sup> , 0.94 <sup>(f)</sup>                                                                                                                                                                                                   |                                                                                                                                                                                                                                                                                                                                                                                 | 2 (n=7)               | Mo: 0.86<br>RA: 0.96        | Mo: 0.51<br>RA: 0.62        |
|                                                                    | NEU+SEU (merged datasets) | Mo:<br>0.11, 0.13, 2 x 0.19, 0.25, 0.27 <sup>(e)</sup> , 0.33 <sup>(e)</sup> , 0.36, 0.47, 0.51, 0.54 <sup>(f)</sup> , 0.59, 0.65, 0.74, 0.86 <sup>(f)</sup><br>RA:<br>0.17, 0.17, 0.19, 0.19, 0.27 <sup>(e)</sup> , 0.30, 0.35 <sup>(e)</sup> , 0.39, 0.50, 0.57 <sup>(f)</sup> , 0.62, 0.65, 0.67, 0.94 <sup>(f)</sup> , 0.96 <sup>(e)</sup> |                                                                                                                                                                                                                                                                                                                                                                                 | 1.5                   | Mo: 0.86<br>RA: 0.96        | Mo: 0.36<br>RA: 0.39        |
|                                                                    | Indoor                    | Mo:<br>0.26 <sup>(e)</sup> , 0.27 <sup>(e)</sup> , 0.31, 0.39, 0.42 <sup>(e)</sup> , 0.95, 1.18, 1.57<br>RA:<br>0.28 <sup>(e)</sup> , 0.30 <sup>(e)</sup> , 0.40 <sup>(e)</sup> , 0.41, 0.46 <sup>(e)</sup> , 0.97, 1.24, 1.63                                                                                                                 |                                                                                                                                                                                                                                                                                                                                                                                 | 3                     | Mo: 1.57<br><b>RA: 1.63</b> | Mo: 0.41<br><b>RA: 0.44</b> |
| <b>Tomatoes</b><br>(1 x 0.8 kg a.s./ha; PHI 1 day; outdoor/indoor) | SEU                       | Mo:<br>0.19 <sup>(e)</sup> , 0.21, 0.23 <sup>(e)</sup> , 0.25 <sup>(e)</sup> , 0.26, 0.37, 0.42, 0.43, 0.49<br>RA:<br>0.19 <sup>(e)</sup> , 0.21, 0.23 <sup>(e)</sup> , 0.25 <sup>(e)</sup> , 0.26, 0.37, 0.42, 0.43, 0.49                                                                                                                     | Outdoor (SEU) dataset and indoor dataset were not merged, even though statistically similar (Mann-Whitney U-test; $\alpha=0.05$ ), because of presumed significantly different crop cultivation between outdoor and indoor situation.<br><br>No full dataset of independent indoor trials is available (n=7); one additional GAP compliant residue trial is required (data gap) | 1                     | Mo: 0.49<br>RA: 0.49        | Mo: 0.26<br>RA: 0.26        |
|                                                                    | Indoor                    | Mo:<br>0.19, 0.22, 0.29, 0.30 (cherry), 0.32, 0.51 <sup>(f)</sup> , 0.86 (cherry)<br>RA:<br>0.19, 0.22, 0.29, 0.30 (cherry), 0.32, 0.51 <sup>(f)</sup> , 0.86 (cherry)                                                                                                                                                                         |                                                                                                                                                                                                                                                                                                                                                                                 | 1.5                   | Mo: 0.86<br><b>RA: 0.86</b> | Mo: 0.30<br><b>RA: 0.30</b> |

Summary of the data on formulation equivalence [OECD Guideline 509](#)

| Crop (cGAP)                                                                                                             | Region/<br>Indoor (a) | Residue levels (mg/kg) observed in the supervised residue trials relevant to the supported GAPs (b) | Recommendations/comments (OECD calculations) | MRL proposals (mg/kg) | HR (mg/kg) (c) | STMR (mg/kg) (d) |
|-------------------------------------------------------------------------------------------------------------------------|-----------------------|-----------------------------------------------------------------------------------------------------|----------------------------------------------|-----------------------|----------------|------------------|
| Crop                                                                                                                    | Region                | Residue data (mg/kg)                                                                                | Recommendations/comments                     |                       |                |                  |
| -                                                                                                                       | -                     | <i>No data provided; no data required</i>                                                           | -                                            | -                     | -              | -                |
| <b>Summary of data on residues in pollen and bee products</b> (Regulation (EU) No 283/2013, Annex Part A, point 6.10.1) |                       |                                                                                                     |                                              |                       |                |                  |
| Product(s)                                                                                                              | Region                | Residue data (mg/kg)                                                                                | Recommendations/comments                     |                       |                |                  |
| -                                                                                                                       | -                     | <i>No data provided; no data required</i>                                                           | -                                            | -                     | -              | -                |

- (a): **NEU** or **SEU** for northern or southern **outdoor** trials in EU member states (**N+SEU** if both zones), **Indoor** for glasshouse/protected crops, **Country** if non-EU location.
- (b): Residue levels in trials conducted according to GAP reported in ascending order (e.g. 3x <0.01, 0.01, 6x 0.02, 0.04, 0.08, 3x 0.10, 2x 0.15, 0.17). When residue definition for monitoring and risk assessment differs, use **Mo/RA** to differentiate data expressed according to the residue definition for **Monitoring and Risk Assessment**.
- (c): **HR**: Highest residue. When residue definition for monitoring and risk assessment differs, HR according to residue definition for monitoring reported in brackets (HR<sub>Mo</sub>).
- (d): **STMR**: Supervised Trials Median Residue. When residue definition for monitoring and risk assessment differs, STMR according to definition for monitoring reported in brackets (STMR<sub>Mo</sub>).
- (e) Result at higher PHI since it was higher than at shorter PHI
- (f) Averaged value from dependent trials

**Inputs for animal burden calculations**

| Feed commodity        | Median dietary burden |         | Maximum dietary burden |         |
|-----------------------|-----------------------|---------|------------------------|---------|
|                       | (mg/kg)               | Comment | (mg/kg)                | Comment |
| <i>not applicable</i> | -                     | -       | -                      | -       |

**Residues from livestock feeding studies (Regulation (EU) N° 283/2013, Annex Part A, points 6.4.1, 6.4.2, 6.4.3 and 6.4.4)**  
**OECD Guideline 505 and OECD Guidance, series on pesticides No 73**

| MRL calculations                                                                       | Ruminant                                                              |                      |                                   |                      | Pig/Swine                         |                        | Poultry                           |                       | Fish                              |                      |
|----------------------------------------------------------------------------------------|-----------------------------------------------------------------------|----------------------|-----------------------------------|----------------------|-----------------------------------|------------------------|-----------------------------------|-----------------------|-----------------------------------|----------------------|
|                                                                                        | <b>Highest expected intake</b><br>(mg/kg bw/d)<br>(mg/kg DM for fish) | Beef cattle          |                                   | Ram/Ewe              |                                   | Breeding               |                                   | Broiler               |                                   | Carp                 |
|                                                                                        | Dairy cattle                                                          |                      | Lamb                              |                      | Finishing                         |                        | Layer                             |                       | Trout                             | n.a.                 |
|                                                                                        |                                                                       |                      |                                   |                      |                                   |                        | Turkey                            |                       | Fish intake >0.1 mg/kg DM         |                      |
| Intake >0.004 mg/kg bw                                                                 | No                                                                    |                      | No                                |                      | No                                |                        | No                                |                       | No                                |                      |
| Feeding study submitted                                                                | No                                                                    |                      | No                                |                      | No                                |                        | No                                |                       | No                                |                      |
| <b>Representative feeding level</b> (mg/kg bw/d, mg/kg DM for fish) and <b>N rates</b> | Level                                                                 | Beef: N<br>Dairy: N  | Level                             | Lamb: N<br>Ewe: N    | Level                             | N rate<br>Breed/Finish | Level                             | B or T: N<br>Layer: N | Level                             | N rate<br>Carp/Trout |
|                                                                                        | Estimated HR <sup>(a)</sup> at 1N                                     | <b>MRL proposals</b> | Estimated HR <sup>(a)</sup> at 1N | <b>MRL proposals</b> | Estimated HR <sup>(a)</sup> at 1N | <b>MRL proposals</b>   | Estimated HR <sup>(a)</sup> at 1N | <b>MRL proposals</b>  | Estimated HR <sup>(a)</sup> at 1N | <b>MRL proposals</b> |
| Muscle                                                                                 |                                                                       |                      |                                   |                      |                                   |                        |                                   |                       |                                   |                      |
| Fat                                                                                    |                                                                       |                      |                                   |                      |                                   |                        |                                   |                       |                                   |                      |
| Meat <sup>(b)</sup>                                                                    |                                                                       |                      |                                   |                      |                                   |                        |                                   |                       |                                   |                      |
| Liver                                                                                  |                                                                       |                      |                                   |                      |                                   |                        |                                   |                       |                                   |                      |
| Kidney                                                                                 |                                                                       |                      |                                   |                      |                                   |                        |                                   |                       |                                   |                      |
| Milk <sup>(a)</sup>                                                                    |                                                                       |                      |                                   |                      |                                   |                        |                                   |                       |                                   |                      |
| Eggs                                                                                   |                                                                       |                      |                                   |                      |                                   |                        |                                   |                       |                                   |                      |
| Method of calculation <sup>(c)</sup>                                                   | <i>Not required</i>                                                   |                      | <i>Not required</i>               |                      | <i>Not required</i>               |                        | <i>Not required</i>               |                       | <i>Not required</i>               |                      |

<sup>(a)</sup>: Estimated HR calculated at 1N level (**estimated mean level for milk**).

<sup>(b)</sup>: HR in meat calculated for mammalian on the basis of 20% fat + 80% muscle and 10% fat + 90% muscle for poultry

<sup>(c)</sup>: The OECD guidance document on residues in livestock (series on pesticides 73) recommends three different approaches to derive MRLs for animal products; by applying a transfer factor (Tf), by intrapolation (It) or by linear regression (Ln). Fill in method(s) considered to derive the MRL proposals.

| STMR calculations                                                                      | Ruminant                                                             |                                     |                             |                                     | Pig/Swine                   |                                     | Poultry                     |                                     | Fish                        |                                     |
|----------------------------------------------------------------------------------------|----------------------------------------------------------------------|-------------------------------------|-----------------------------|-------------------------------------|-----------------------------|-------------------------------------|-----------------------------|-------------------------------------|-----------------------------|-------------------------------------|
|                                                                                        | <b>Median expected intake</b><br>(mg/kg bw/d)<br>(mg/kg DM for fish) | Beef cattle                         |                             | Ram/Ewe                             |                             | Breeding                            |                             | Broiler                             |                             | Carp                                |
|                                                                                        | Dairy cattle                                                         |                                     | Lamb                        |                                     | Finishing                   |                                     | Layer                       |                                     | Trout                       |                                     |
|                                                                                        |                                                                      |                                     |                             |                                     |                             |                                     | Turkey                      |                                     |                             |                                     |
| <b>Representative feeding level</b> (mg/kg bw/d, mg/kg DM for fish) and <b>N rates</b> | Level                                                                | Beef: N<br>Dairy: N                 | Level                       | Lamb : N<br>Ewe: N                  | Level                       | N rate<br>Breed/Finish              | Level                       | B or T: N<br>Layer: N               | Level                       | N rate<br>Carp/Trout                |
|                                                                                        | Mean level in feeding level                                          | Estimated STMR <sup>(b)</sup> at 1N | Mean level in feeding level | Estimated STMR <sup>(b)</sup> at 1N | Mean level in feeding level | Estimated STMR <sup>(b)</sup> at 1N | Mean level in feeding level | Estimated STMR <sup>(b)</sup> at 1N | Mean level in feeding level | Estimated STMR <sup>(b)</sup> at 1N |
| Muscle                                                                                 |                                                                      |                                     |                             |                                     |                             |                                     |                             |                                     |                             |                                     |
| Fat                                                                                    |                                                                      |                                     |                             |                                     |                             |                                     |                             |                                     |                             |                                     |
| Meat <sup>(a)</sup>                                                                    |                                                                      |                                     |                             |                                     |                             |                                     |                             |                                     |                             |                                     |
| Liver                                                                                  |                                                                      |                                     |                             |                                     |                             |                                     |                             |                                     |                             |                                     |
| Kidney                                                                                 |                                                                      |                                     |                             |                                     |                             |                                     |                             |                                     |                             |                                     |
| Milk                                                                                   |                                                                      |                                     |                             |                                     |                             |                                     |                             |                                     |                             |                                     |
| Eggs                                                                                   |                                                                      |                                     |                             |                                     |                             |                                     |                             |                                     |                             |                                     |
| Method of calculation <sup>(c)</sup>                                                   | <i>Not required</i>                                                  |                                     | <i>Not required</i>         |                                     | <i>Not required</i>         |                                     | <i>Not required</i>         |                                     | <i>Not required</i>         |                                     |

<sup>(a)</sup>: STMR in meat calculated for mammalian on the basis of 20% fat + 80% muscle and 10% fat + 90% muscle for poultry

<sup>(b)</sup>: When the mean level is set at the LOQ, the STMR is set at the LOQ.

<sup>(c)</sup>: The OECD guidance document on residues in livestock (series on pesticide 73) recommends three different approaches to derive MRLs for animal products; by applying a transfer factor (Tf), by intrapolation (It) or by linear regression (Ln). Fill in method(s) considered to derive the MRL proposals.

### Conversion Factors (CF) for monitoring to risk assessment

| Median Conversion Factors (CF) calculated at the different PHIs in the supervised residues trials <sup>(a)</sup><br>OECD Guidance, series on pesticides No 66 |                       |                       |               |               |                |                |                      |                                                                                                                       |
|---------------------------------------------------------------------------------------------------------------------------------------------------------------|-----------------------|-----------------------|---------------|---------------|----------------|----------------|----------------------|-----------------------------------------------------------------------------------------------------------------------|
| PHI (days)                                                                                                                                                    | 1                     | 3                     | 5             | 7             | 20-22          | 28-36          | 57-63                | Comments                                                                                                              |
| Grapes                                                                                                                                                        | n.r.                  | n.r.                  | n.r.          | n.r.          | 1.05<br>(n=28) | 1.08<br>(n=19) | <b>1.61</b><br>(n=9) | Supported GAP (BBCH 77 – BBCH 89; PHI 21 days) allows for treatment around 60 days pre-harvest;<br>n.r.: not relevant |
| Strawberries                                                                                                                                                  | <b>1.06</b><br>(n=25) | <b>1.09</b><br>(n=25) | 1.10<br>(n=3) | 1.17<br>(n=3) | -              | -              | -                    |                                                                                                                       |
| Tomatoes                                                                                                                                                      | n.a.                  | n.a.                  | n.a.          | n.a.          | n.a.           | n.a.           | n.a.                 | not applicable, as M31 residues < LOQ (<0.01 mg/kg)                                                                   |
| -Table and wine grapes: 1.6<br>-Strawberries: 1.1<br>-Tomato: none                                                                                            |                       |                       |               |               |                |                |                      |                                                                                                                       |

(a): CF calculated at the supported PHI are underlined

### Processing factors (Regulation (EU) N° 283/2013, Annex Part A, points 6.5.2 and 6.5.3)

OECD Guideline 508 and OECD Guidance, series on testing and assessment No 96

| Crop (RAC)/Edible part or Crop (RAC)/Processed product | Number of studies <sup>(a)</sup> | Processing Factor (PF)                                           |           | Conversion Factor (CF <sub>P</sub> ) for RA <sup>(b)</sup> |
|--------------------------------------------------------|----------------------------------|------------------------------------------------------------------|-----------|------------------------------------------------------------|
|                                                        |                                  | Individual values                                                | Median PF |                                                            |
| Strawberries / canned                                  | 8                                | 0.15, 0.25, 0.35, 0.50, 0.70, 0.88, 1.00, 1.07                   | 0.60      | -                                                          |
| Strawberries / jam                                     | 8                                | 0.16, 0.21, 0.32, 0.45, 0.48, 0.50, 0.54, 0.59                   | 0.47      | -                                                          |
| Tomatoes / juice                                       | 8                                | 0.03, 0.04, 0.08, 0.15, 0.15, 0.21, 0.45, 0.60                   | 0.15      | -                                                          |
| Tomatoes / puree                                       | 11                               | 0.28, 0.42, 0.52, 0.55, 0.56, 0.62, 0.73, 0.76, 0.90, 1.22, 1.25 | 0.62      | -                                                          |
| Tomatoes/ paste                                        | 3                                | 0.71, 0.92, 1.33                                                 | 0.92      | -                                                          |
| Tomatoes / ketchup                                     | 4                                | 0.42, 0.62, 0.80, 1.25                                           | 0.71      | -                                                          |
| Tomatoes / canned                                      | 8                                | 0.03, 0.04, 2x 0.05, 0.06, 0.06, 0.08, 0.10                      | 0.05      | -                                                          |
| Grapes / raisins                                       | 31                               | 0.49 – 4.20; 0.65, 0.81, 1.71, 2.50                              | 1.83      | -                                                          |
| Grapes / juice                                         | 31                               | 0.03 – 0.23; 0.05, 0.06, 0.20, 0.21                              | 0.08      | -                                                          |
| Grapes / must                                          | 34                               | 0.09 – 3.00                                                      | 0.50      | -                                                          |
| Grapes / red wine                                      | 34                               | 0.01 – 0.5                                                       | 0.05      | -                                                          |
| Grapes / white wine                                    | 38                               | 0.01 – 0.3                                                       | 0.10      | -                                                          |

<sup>(a)</sup>: Studies with residues in the RAC at or close to the LOQ should be disregarded (unless concentration)

<sup>(b)</sup>: Conversion factors for processed commodities cannot be derived for the time being since the residue definition for risk assessment in processed commodities is pending the hydrolysis studies on M31.

<sup>(c)</sup>: M31 residue levels were <LOQ in RAC and ≤LOQ in processed commodities

### Consumer risk assessment (Regulation (EU) N° 283/2013, Annex Part A, point 6.9)

#### Consumer risk assessment limited to the representative uses (provisional)

|                                                |                                                   |
|------------------------------------------------|---------------------------------------------------|
| <b>ADI</b>                                     | 0.012 mg/kg bw per day                            |
| TMDI according to EFSA PRIMo (rev.2)           | 76% ADI (WHO Cluster diet B)                      |
| NTMDI, according to (to be specified)          | Not applicable                                    |
| IEDI (% ADI), according to EFSA PRIMo (rev.2)  | Highest IEDI:<br>16% ADI (FR, all population)     |
| NEDI (% ADI), according to (to be specified)   | Not applicable                                    |
| Factors included in the calculations           | MRL (TMDI calculations); STMR (IEDI calculations) |
| <b>ARfD</b>                                    | 0.1 mg/kg bw                                      |
| IESTI (% ARfD), according to EFSA PRIMo        | Highest IESTI: 82% ARfD (table grapes)            |
| NESTI (% ARfD), according to (to be specified) | Not applicable                                    |
| Factors included in IESTI and NESTI            | HR                                                |

#### Additional contribution to the consumer intakes through drinking water resulting from groundwater metabolite(s) expected to be present above 0.75 µg/L

|                                           |                |
|-------------------------------------------|----------------|
| Metabolite(s)                             | Not applicable |
| ADI (mg/kg bw per day)                    | Not applicable |
| Intake of groundwater metabolites (% ADI) | Not applicable |

**WHO Guideline (WHO, 2009)**

#### Proposed MRLs (Regulation (EU) No 283/2013, Annex Part A, points 6.7.2 and 6.7.3)

| Code <sup>(a)</sup>       | Commodity/Group              | MRL/Import tolerance <sup>(b)</sup> ( mg/kg) and Comments |                                                                                          |
|---------------------------|------------------------------|-----------------------------------------------------------|------------------------------------------------------------------------------------------|
| <b>Plant commodities</b>  |                              |                                                           |                                                                                          |
| 0151010/<br>0151020       | Table grapes/<br>Wine grapes | 2                                                         | -                                                                                        |
| 0152000                   | Strawberries                 | 3                                                         | NEU, SEU and indoor uses                                                                 |
| 0231010                   | Tomatoes                     | 1.5                                                       | SEU and indoor uses. (dataset incomplete, an additional GAP compliant trial is required) |
| <b>Animal commodities</b> |                              |                                                           |                                                                                          |
| -                         | Not required                 |                                                           |                                                                                          |

(a): Commodity code number, as listed in Annex I of Regulation (EC) No 396/2005

(b): MRLs proposed at the LOQ, should be annotated by an asterisk (\*) after the figure.



## Environmental fate and behaviour

### Route of degradation (aerobic) in soil (Regulation (EU) N° 283/2013, Annex Part A, point 7.1.1.1)

|                                                                                                  |                                                                                                                                                                   |
|--------------------------------------------------------------------------------------------------|-------------------------------------------------------------------------------------------------------------------------------------------------------------------|
| Mineralisation after 100 days                                                                    | 2.4-14.2 % AR after 120 d, [ <sup>14</sup> C- pyrimidine]-mepanipyrim (n <sup>6</sup> = 4)<br>5.4 % AR after 120 d, [ <sup>14</sup> C- phenyl]-mepanipyrim (n= 1) |
| Non-extractable residues after 100 days                                                          | 18.6-67.7 % AR after 120 d, [ <sup>14</sup> C- pyrimidine]-mepanipyrim (n= 4)<br>26.0 % AR after 120 d, [ <sup>14</sup> C- phenyl]-mepanipyrim (n= 1)             |
| Metabolites requiring further consideration - name and/or code, % of applied (range and maximum) | No chromatographically resolved metabolites exceeded 5% AR<br>Sterile conditions: No data available                                                               |

### Route of degradation (anaerobic) in soil (Regulation (EU) N° 283/2013, Annex Part A, point 7.1.1.2)

|                                                                                                                             |                                                                                                                                                  |
|-----------------------------------------------------------------------------------------------------------------------------|--------------------------------------------------------------------------------------------------------------------------------------------------|
| Mineralisation after 100 days                                                                                               | 0.7 % after 90 d, [ <sup>14</sup> C-phenyl]-mepanipyrim (n= 1)<br>0.8 % after 90 d, [ <sup>14</sup> C-pyrimidine]-mepanipyrim (n= 1)             |
| Non-extractable residues after 100 days                                                                                     | 22.4-27.8 % after 90 d, [ <sup>14</sup> C-phenyl]-mepanipyrim (n= 1)<br>23.7-26.8 % after 90 d, [ <sup>14</sup> C-pyrimidine]-mepanipyrim (n= 1) |
| Metabolites that may require further consideration for risk assessment - name and/or code, % of applied (range and maximum) | No chromatographically resolved metabolites exceeded 5% AR<br>Sterile conditions: No data available                                              |

### Route of degradation (photolysis) on soil (Regulation (EU) N° 283/2013, Annex Part A, point 7.1.1.3)

|                                                                                                                             |                                                                                                                                              |
|-----------------------------------------------------------------------------------------------------------------------------|----------------------------------------------------------------------------------------------------------------------------------------------|
| Metabolites that may require further consideration for risk assessment - name and/or code, % of applied (range and maximum) | No chromatographically resolved metabolites exceeded 5% AR<br>Sterile conditions: No data available                                          |
| Mineralisation at study end                                                                                                 | 1.8 % after 14 d, [ <sup>14</sup> C-pyrimidine]-CO <sub>2</sub> (n= 1)<br>3.5 % after 14 d, [ <sup>14</sup> C-phenyl]-CO <sub>2</sub> (n= 1) |
| Non-extractable residues at study end                                                                                       | 7.2-7.4 % after 14 d, [ <sup>14</sup> C-pyrimidine]-mepanipyrim (n= 1)<br>8.4-8.7 % after 14 d, [ <sup>14</sup> C-phenyl]-residues (n= 1)    |

<sup>6</sup> n corresponds to the number of soils.

**Rate of degradation in soil (aerobic) laboratory studies active substance (Regulation (EU) N° 283/2013, Annex Part A, point 7.1.2.1.1 and Regulation (EU) N° 284/2013, Annex Part A, point 9.1.1.1)**

| Parent Mepanipyrin                   | Dark aerobic conditions |                          |                                |                                        |                       |                       |                                                    |                       |                                            |
|--------------------------------------|-------------------------|--------------------------|--------------------------------|----------------------------------------|-----------------------|-----------------------|----------------------------------------------------|-----------------------|--------------------------------------------|
|                                      |                         |                          |                                | Persistence endpoints                  |                       |                       | Modelling endpoints                                |                       |                                            |
| Soil type                            | X <sup>7</sup>          | pH <sup>a)</sup>         | t. °C / % water content at pF2 | DT <sub>50</sub> /DT <sub>90</sub> (d) | St. (χ <sup>2</sup> ) | Method of calculation | DT <sub>50</sub> (d) 20 °C pF2/10kPa <sup>b)</sup> | St. (χ <sup>2</sup> ) | Method of calculation                      |
| Loam (study No. 35TM028)             |                         | 6.4 (NA)                 | 20°C /19.6                     | 155.0/744.5                            | 4.7                   | HS                    | 253.92 <sup>d)</sup>                               | 4.7                   | HS <sup>c)</sup><br>k1: 0.0132, k2: 0.0027 |
| Sandy loam (study No. OVJ0024)       |                         | 4.3 (CaCl <sub>2</sub> ) | 20°C /22.0                     | 152.6/506.9                            | 1.7                   | SFO                   | 152.6                                              | 1.7                   | SFO                                        |
| Clay loam (study No. OVJ0024)        |                         | 7.1 (CaCl <sub>2</sub> ) | 20°C /40.0                     | 38.8/128.9                             | 2.4                   | SFO                   | 38.8                                               | 2.4                   | SFO                                        |
| Sandy clay (study No. OVJ0024)       |                         | 6.1 (CaCl <sub>2</sub> ) | 20°C / 44.9                    | 155.8/>1000                            | 1.9                   | FOMC                  | 123.4                                              | 4.5                   | SFO                                        |
| Geometric mean (if not pH dependent) |                         |                          |                                |                                        |                       |                       | 116.7                                              |                       |                                            |
| pH dependence                        |                         |                          |                                |                                        |                       |                       |                                                    | No                    |                                            |

<sup>a)</sup> Measured in [medium to be stated, usually calcium chloride solution or water]

<sup>b)</sup> Normalised using a Q10 of 2.58 and Walker equation coefficient of 0.7

<sup>c)</sup> DT<sub>50</sub> from slow phase of HS and DFOP models are used for modelling

<sup>d)</sup> DT<sub>50</sub> = ln2/k<sub>2</sub>

**Rate of degradation in soil (aerobic) laboratory studies transformation products (Regulation (EU) N° 283/2013, Annex Part A, point 7.1.2.1.2 and Regulation (EU) N° 284/2013, Annex Part A, point 9.1.1.1)**

No chromatographically resolved metabolites exceeding 5% AR were identified.

**Rate of degradation field soil dissipation studies (Regulation (EU) N° 283/2013, Annex Part A, point 7.1.2.2.1 and Regulation (EU) N° 284/2013, Annex Part A, point 9.1.1.2.1)**

| Parent                                     | Location (country or USA state). | Aerobic conditions |                  |            |                             |                             |                       |                       |                                           |                       |                       |
|--------------------------------------------|----------------------------------|--------------------|------------------|------------|-----------------------------|-----------------------------|-----------------------|-----------------------|-------------------------------------------|-----------------------|-----------------------|
|                                            |                                  | X <sup>8</sup>     | pH <sup>a)</sup> | Depth (cm) | DT <sub>50</sub> (d) actual | DT <sub>90</sub> (d) actual | St. (χ <sup>2</sup> ) | Method of calculation | DT <sub>50</sub> (d) Norm <sup>b)</sup> . | St. (χ <sup>2</sup> ) | Method of calculation |
| Loamy sand (Study No. 35TM033) (bare soil) | Netherlands                      |                    | 6.2              | 20         | 42.9                        | 142                         | 8.97                  | SFO                   | 35.7                                      | 12.9                  | SFO                   |

<sup>7</sup> X This column is reserved for any other property that is considered to have a particular impact on the degradation rate. Column and this footnote may be removed if not used.

<sup>8</sup> X This column is reserved for any other property that is considered to have a particular impact on the degradation rate. Column and this footnote may be removed if not used.

**Rate of degradation field soil dissipation studies (Regulation (EU) N° 283/2013, Annex Part A, point 7.1.2.2.1 and Regulation (EU) N° 284/2013, Annex Part A, point 9.1.1.2.1)**

| Parent                                                 | Aerobic conditions               |                |                  |            |                             |                             |                       |                       |                                           |                       |                                          |
|--------------------------------------------------------|----------------------------------|----------------|------------------|------------|-----------------------------|-----------------------------|-----------------------|-----------------------|-------------------------------------------|-----------------------|------------------------------------------|
| Soil type (indicate if bare or cropped soil was used). | Location (country or USA state). | X <sup>8</sup> | pH <sup>a)</sup> | Depth (cm) | DT <sub>50</sub> (d) actual | DT <sub>90</sub> (d) actual | St. (χ <sup>2</sup> ) | Method of calculation | DT <sub>50</sub> (d) Norm <sup>b)</sup> . | St. (χ <sup>2</sup> ) | Method of calculation                    |
| Silt loam (Study No. 35TM033) (bare soil)              | France                           |                | 6.9              | 20         | 11.9                        | 127                         | 8.74                  | DFOP (modified)       | 59.7                                      | 10.8                  | HS<br>k1:<br>0.060704,<br>k2:<br>0.01161 |
| Clay loam (Study No. 35TM033) (bare soil)              | Spain                            |                | 8.3              | 20         | 82.1                        | 273                         | 15.3                  | SFO                   | -                                         | -                     | -                                        |
| Clay (Study No. 35TM033) (bare soil)                   | Italy                            |                | 7.7              | 20         | 11.8                        | 158                         | 11.5                  | HS (modified)         | 127                                       | 11.5                  | HS<br>k1:<br>0.05545,<br>k2:<br>0.005462 |
| Geometric mean (if not pH dependent)                   |                                  |                |                  |            |                             |                             |                       |                       |                                           |                       |                                          |
| pH dependence                                          |                                  |                |                  |            |                             | No                          |                       |                       |                                           |                       |                                          |

<sup>a)</sup> Measured in 1M KCl

<sup>b)</sup> Normalised using a Q10 of 2.58 and Walker equation coefficient of 0.7, values are DegT<sub>50</sub>matrix

**Combined laboratory and field kinetic endpoints for modelling (when not from different populations)\***

|                                                                                                      |                                                                          |              |
|------------------------------------------------------------------------------------------------------|--------------------------------------------------------------------------|--------------|
| Rate of degradation in soil active substance, normalised geometric mean (if not pH dependent)        | Mepanipyrim<br>90.6 (d)**                                                |              |
| Rate of degradation in soil transformation products, normalised geometric mean (if not pH dependent) | Met I<br>No chromatographically resolved metabolites exceeded 5% AR      | Met II<br>/  |
| Kinetic formation fraction (f. f. $k_f / k_{dp}$ ) of transformation products, arithmetic mean       | Met I from<br>No chromatographically resolved metabolites exceeded 5% AR | Met 2 from / |

\* Only relevant after implementation of the published EFSA guidance describing how to amalgamate laboratory and field endpoints.

\*\* Derived by pooling laboratory and field data to be used for future simulations.

**Soil accumulation (Regulation (EU) N° 283/2013, Annex Part A, point 7.1.2.2 and Regulation (EU) N° 284/2013, Annex Part A, point 9.1.1.2)**

Soil accumulation and plateau concentration

Not applicable:  $DT_{90}$  was < 1 year in each test soil, ranging from 71 to 275 days, based on FOCUS kinetics. No studies on soil accumulation were submitted.

**Rate of degradation in soil (anaerobic) laboratory studies active substance (Regulation (EU) N° 283/2013, Annex Part A, point 7.1.2.1.3 and Regulation (EU) N° 284/2013, Annex Part A, point 9.1.1.1)**

| Parent                                 | Dark anaerobic conditions |                          |                |                                         |                                          |                  |                       |
|----------------------------------------|---------------------------|--------------------------|----------------|-----------------------------------------|------------------------------------------|------------------|-----------------------|
|                                        | X <sub>9</sub>            | pH <sup>a)</sup>         | t. °C / % MWHC | DT <sub>50</sub> / DT <sub>90</sub> (d) | DT <sub>50</sub> (d) 20 °C <sup>b)</sup> | St. ( $\chi^2$ ) | Method of calculation |
| UK sandy loam soil (study No. OVJ0025) |                           | 5.8 (CaCl <sub>2</sub> ) | 20°C/pF2       | 337/1121                                |                                          | 0.8              | SFO                   |
| Geometric mean (if not pH dependent)   |                           |                          |                | /                                       |                                          |                  |                       |

<sup>a)</sup> Measured in [medium to be stated, usually calcium chloride solution or water]

<sup>b)</sup> Normalised using a Q10 of 2.58

<sup>9</sup> X This column is reserved for any other property that is considered to have a particular impact on the degradation rate. Column and this footnote may be removed if not used.

**Rate of degradation in soil (anaerobic) laboratory studies transformation products (Regulation (EU) N° 283/2013, Annex Part A, point 7.1.2.1.4 and Regulation (EU) N° 284/2013, Annex Part A, point 9.1.1.1)**

| Met 1                                                      | Dark anaerobic conditions Metabolite dosed or the precursor from which the f.f. was derived was xxx. |                  |                |                                         |                                        |                                         |                       |                       |
|------------------------------------------------------------|------------------------------------------------------------------------------------------------------|------------------|----------------|-----------------------------------------|----------------------------------------|-----------------------------------------|-----------------------|-----------------------|
| Soil type                                                  | X <sup>10</sup>                                                                                      | pH <sup>a)</sup> | t. °C / % MWHC | DT <sub>50</sub> / DT <sub>90</sub> (d) | f. f. k <sub>f</sub> / k <sub>dp</sub> | DT <sub>50</sub> (d) 20°C <sup>b)</sup> | St. (χ <sup>2</sup> ) | Method of calculation |
| No chromatographically resolved metabolites exceeded 5% AR |                                                                                                      |                  |                |                                         |                                        |                                         |                       |                       |
|                                                            |                                                                                                      |                  |                |                                         |                                        |                                         |                       |                       |
| Geometric mean (if not pH dependent)                       |                                                                                                      |                  |                |                                         |                                        |                                         |                       |                       |
| Arithmetic mean                                            |                                                                                                      |                  |                |                                         |                                        |                                         |                       |                       |

<sup>a)</sup> Measured in [medium to be stated, usually calcium chloride solution or water]

<sup>b)</sup> Normalised using a Q10 of 2.58

**Rate of degradation on soil (photolysis) laboratory active substance (Regulation (EU) N° 283/2013, Annex Part A, point 7.1.1.3)**

| Parent                                    | Soil photolysis |                          |                        |                                                            |                       |                       |
|-------------------------------------------|-----------------|--------------------------|------------------------|------------------------------------------------------------|-----------------------|-----------------------|
| Soil type                                 | X <sup>10</sup> | pH <sup>a)</sup>         | t. °C / % MWHC         | DT <sub>50</sub> / DT <sub>90</sub> (d) calculated at 40°N | St. (χ <sup>2</sup> ) | Method of calculation |
| Clay loam soil (Study report No. 35TM029) |                 | 7.2 (NA <sup>b)</sup> )  | 20°C/ 45%              | 138.6/ 460.5                                               | NA                    | NA                    |
| Clay loam soil (Study report No. OVJ0079) |                 | 7.0 (CaCl <sub>2</sub> ) | 20°C/ NA <sup>b)</sup> | 479 <sup>c)</sup> /1592 <sup>c)</sup>                      | NA                    | NA                    |

<sup>a)</sup> Measured in [medium to be stated, usually calcium chloride solution or water]

<sup>b)</sup> NA = not available

<sup>c)</sup> to be treated with caution since these values far exceed the incubation period

<sup>10</sup> X This column is reserved for any other property that is considered to have a particular impact on the degradation rate. Column and this footnote may be removed if not used.

**Soil adsorption active substance (Regulation (EU) N° 283/2013, Annex Part A, point 7.1.3.1.1 and Regulation (EU) N° 284/2013, Annex Part A, point 9.1.2.1)**

| Parent                                                |      |                        |                       |                        |                       |                         |        |
|-------------------------------------------------------|------|------------------------|-----------------------|------------------------|-----------------------|-------------------------|--------|
| Soil Type                                             | OC % | Soil pH <sup>a)</sup>  | K <sub>d</sub> (mL/g) | K <sub>oc</sub> (mL/g) | K <sub>F</sub> (mL/g) | K <sub>Foc</sub> (mL/g) | 1/n    |
| Acidic UK sand soil (Study report No. 35TM004)        | 0.9  | 5.2 (H <sub>2</sub> O) | -                     | 874.4                  | 7.870                 | 874                     | 0.829  |
| Loamy sand soil (Study report No. 35TM004)            | 2.4  | 5.8 (H <sub>2</sub> O) | -                     | 635.0                  | 15.241                | 635                     | 0.766  |
| Alkaline loam soil (Study report No. 35TM004)         | 1.6  | 7.9 (H <sub>2</sub> O) | -                     | 395.3                  | 6.324                 | 395                     | 0.805  |
| California sandy loam soil (Study report No. 35TM004) | 0.6  | 8.3 (H <sub>2</sub> O) | -                     | 5859.3                 | 35.156                | 5859                    | 0.910  |
| Loamy sand soil (Study No. 35TM0031)                  | 9.1  | 4.1                    | -                     | 1756                   | 159.8                 | 1756                    | 0.837  |
| Geometric mean (if not pH dependent)*                 |      |                        |                       |                        |                       | 1177                    | 0.828  |
| Arithmetic mean (if not pH dependent)                 |      |                        |                       |                        |                       | 44.88                   | 1903.8 |
| pH dependence                                         |      |                        | No                    |                        |                       |                         |        |

<sup>a)</sup> Measured in [medium to be stated, usually calcium chloride solution or water]

\* Only relevant after implementation of the published EFSA guidance.

**Soil adsorption transformation products (Regulation (EU) N° 283/2013, Annex Part A, point 7.1.3.1.2 and Regulation (EU) N° 284/2013, Annex Part A, point 9.1.2.1)**

| Metabolite 1                                               |      |                       |                       |                         |                       |                         |     |
|------------------------------------------------------------|------|-----------------------|-----------------------|-------------------------|-----------------------|-------------------------|-----|
| Soil Type                                                  | OC % | Soil pH <sup>a)</sup> | K <sub>d</sub> (mL/g) | K <sub>doc</sub> (mL/g) | K <sub>F</sub> (mL/g) | K <sub>Foc</sub> (mL/g) | 1/n |
| No chromatographically resolved metabolites exceeded 5% AR |      |                       |                       |                         |                       |                         |     |
|                                                            |      |                       |                       |                         |                       |                         |     |
| Geometric mean (if not pH dependent)*                      |      |                       |                       |                         |                       |                         |     |
| Arithmetic mean (if not pH dependent)                      |      |                       |                       |                         |                       |                         |     |
| pH dependence, <i>Yes or No</i>                            |      |                       |                       |                         |                       |                         |     |

<sup>a)</sup> Measured in [medium to be stated, usually calcium chloride solution or water]

\* Only relevant after implementation of the published EFSA guidance.

**Mobility in soil column leaching active substance (Regulation (EU) N° 283/2013, Annex Part A, point 7.1.4.1.1 and Regulation (EU) N° 284/2013, Annex Part A, point 9.1.2.1)**

Column leaching

|                                                                                                                                                                                                                                                                                                                                                                                                                                                  |
|--------------------------------------------------------------------------------------------------------------------------------------------------------------------------------------------------------------------------------------------------------------------------------------------------------------------------------------------------------------------------------------------------------------------------------------------------|
| Elution (mm): 300 mm<br>Time period (d): 2 d                                                                                                                                                                                                                                                                                                                                                                                                     |
| Leachate: 0.009% - 0.134% total residues/radioactivity in leachate (3 soils)<br>(Study report No. 6177-535/17)<br>Leachate: < 0.1% total residues/radioactivity in leachate (3 soils tested, but in two of the three soils investigated radioactivity was not present in the leachate from the soil columns)<br>(Study report No. 6750)<br><br>88-94 % total residues/radioactivity retained in top 6 cm after 2 days<br>(Study report No. 6750) |

**Mobility in soil column leaching transformation products (Regulation (EU) N° 283/2013, Annex Part A, point 7.1.4.1.2 and Regulation (EU) N° 284/2013, Annex Part A, point 9.1.2.1)**

Column leaching

|                                                            |
|------------------------------------------------------------|
| Elution (mm): x mm<br>Time period (d): x d                 |
| No chromatographically resolved metabolites exceeded 5% AR |

**Lysimeter / field leaching studies (Regulation (EU) N° 283/2013, Annex Part A, points 7.1.4.2 / 7.1.4.3 and Regulation (EU) N° 284/2013, Annex Part A, points 9.1.2.2 / 9.1.2.3)**

Lysimeter/ field leaching studies

Acceptable predicted environmental concentrations in groundwater (<0.001 µg/L) were calculated (vol. 3 CP B8) therefore no field leaching data are provided or are considered necessary.

**Hydrolytic degradation (Regulation (EU) N° 283/2013, Annex Part A, point 7.2.1.1)**

Hydrolytic degradation of the active substance and metabolites &gt; 10 %

pH 5: <9% after 30 days  
No degradation of metabolite > 10%

pH 7: <9% after 30 days  
No degradation of metabolite > 10%

pH 9: 31.80% after 30 days at 70 °C

**Aqueous photochemical degradation (Regulation (EU) N° 283/2013, Annex Part A, points 7.2.1.2 / 7.2.1.3)**

Photolytic degradation of active substance and metabolites above 10 %

Artificial light equivalent to natural Florida summer sunlight, 50°N; DT<sub>50</sub> 10.5 days (30 days irradiation)  
None of the 6 minor metabolites accounted for >3% of applied radioactivity at any time point  
(Study report No. 6765)

Artificial sunlight, DT<sub>50</sub> = 846.15 hours equivalent to 63.41 days with natural sunlight at latitude 30°N  
No photodegradates representing more than 10 % of the applied radioactivity were detected.  
(Study report No. 35TM030)

Quantum yield of direct phototransformation in water at Σ &gt; 290 nm

$5.87 \times 10^{-6} \text{ mol} \cdot \text{Einstein}^{-1}$

**'Ready biodegradability' (Regulation (EU) N° 283/2013, Annex Part A, point 7.2.2.1)**

Readily biodegradable (yes/no)

There is a study indicating that the substance is **not readily biodegradable** (Study report No. 35TM027)



**Aerobic mineralisation in surface water (Regulation (EU) N° 283/2013, Annex Part A, point 7.2.2.2 and Regulation (EU) N° 284/2013, Annex Part A, point 9.2.1)**

| Parent                                                           |                      |                         |                        |                                                                               |                                         |                          |                                                               |                                            |                          |                          |
|------------------------------------------------------------------|----------------------|-------------------------|------------------------|-------------------------------------------------------------------------------|-----------------------------------------|--------------------------|---------------------------------------------------------------|--------------------------------------------|--------------------------|--------------------------|
| System identifier<br>(indicate fresh,<br>estuarine or<br>marine) | pH<br>water<br>phase | pH<br>sed <sup>a)</sup> | t.<br>°C <sup>b)</sup> | DT <sub>50</sub> /DT <sub>90</sub> whole sys.<br>(suspended sediment<br>test) |                                         | St.<br>(χ <sup>2</sup> ) | DT <sub>50</sub> /DT <sub>90</sub><br>Water (pelagic<br>test) |                                            | St.<br>(χ <sup>2</sup> ) | Method of<br>calculation |
|                                                                  |                      |                         |                        | At study<br>temp                                                              | Normalise<br>d to x<br>°C <sup>c)</sup> |                          | At<br>study<br>temp                                           | Norma<br>lised<br>to x<br>°C <sup>c)</sup> |                          |                          |
| <b>No study<br/>available (data<br/>requirement)</b>             |                      |                         |                        |                                                                               |                                         |                          |                                                               |                                            |                          |                          |
|                                                                  |                      |                         |                        |                                                                               |                                         |                          |                                                               |                                            |                          |                          |
|                                                                  |                      |                         |                        |                                                                               |                                         |                          |                                                               |                                            |                          |                          |

<sup>a)</sup> Measured in [medium to be stated, usually calcium chloride solution or water]

<sup>b)</sup> Temperature of incubation=temperature that the environmental media was collected or std temperature of 20°C

<sup>c)</sup> Normalised using a Q10 of 2.58 to the temperature of the environmental media at the point of sampling. (note temp of x should be stated).

| Metabolite X                                                            | Max in total system x % after n days |                         |                        |                                                                               |                                         |                          |                                                               |                                            |                          |                          |
|-------------------------------------------------------------------------|--------------------------------------|-------------------------|------------------------|-------------------------------------------------------------------------------|-----------------------------------------|--------------------------|---------------------------------------------------------------|--------------------------------------------|--------------------------|--------------------------|
| System identifier<br>(indicate fresh,<br>estuarine or<br>marine)        | pH<br>water<br>phase                 | pH<br>sed <sup>a)</sup> | t.<br>°C <sup>b)</sup> | DT <sub>50</sub> /DT <sub>90</sub> whole sys.<br>(suspended sediment<br>test) |                                         | St.<br>(χ <sup>2</sup> ) | DT <sub>50</sub> /DT <sub>90</sub><br>Water (pelagic<br>test) |                                            | St.<br>(χ <sup>2</sup> ) | Method of<br>calculation |
|                                                                         |                                      |                         |                        | At study<br>temp                                                              | Normalise<br>d to x<br>°C <sup>c)</sup> |                          | At<br>study<br>temp                                           | Norma<br>lised<br>to x<br>°C <sup>c)</sup> |                          |                          |
| No<br>chromatographic<br>ally resolved<br>metabolites<br>exceeded 5% AR |                                      |                         |                        |                                                                               |                                         |                          |                                                               |                                            |                          |                          |
|                                                                         |                                      |                         |                        |                                                                               |                                         |                          |                                                               |                                            |                          |                          |
|                                                                         |                                      |                         |                        |                                                                               |                                         |                          |                                                               |                                            |                          |                          |

<sup>a)</sup> Measured in [medium to be stated, usually calcium chloride solution or water]

<sup>b)</sup> Temperature of incubation=temperature that the environmental media was collected or std temperature of 20°C

<sup>c)</sup> Normalised using a Q10 of 2.58 to the temperature of the environmental media at the point of sampling. (note temp of x should be stated).

| Mineralisation and non extractable residues (for parent dosed experiments) |                |        |                                                   |                                                                       |                                                                                          |
|----------------------------------------------------------------------------|----------------|--------|---------------------------------------------------|-----------------------------------------------------------------------|------------------------------------------------------------------------------------------|
| System identifier (indicate fresh, estuarine or marine)                    | pH water phase | pH sed | Mineralisation x % after n d. (end of the study). | Non-extractable residues. max x % after n d (suspended sediment test) | Non-extractable residues. max x % after n d (end of the study) (suspended sediment test) |
| <b>No data available</b>                                                   |                |        |                                                   |                                                                       |                                                                                          |
|                                                                            |                |        |                                                   |                                                                       |                                                                                          |
|                                                                            |                |        |                                                   |                                                                       |                                                                                          |

**Water / sediment study (Regulation (EU) N° 283/2013, Annex Part A, point 7.2.2.3 and Regulation (EU) N° 284/2013, Annex Part A, point 9.2.2)**

| Parent                                         | Distribution (max in water 1-4% after 100 days) |                        |       |                                                                                                          |                                               |                  |                                                                                                                                            |                  |                                        |                                                                                                                                                                            |                                          |  |
|------------------------------------------------|-------------------------------------------------|------------------------|-------|----------------------------------------------------------------------------------------------------------|-----------------------------------------------|------------------|--------------------------------------------------------------------------------------------------------------------------------------------|------------------|----------------------------------------|----------------------------------------------------------------------------------------------------------------------------------------------------------------------------|------------------------------------------|--|
| Water / sediment system                        | pH water phase                                  | pH sed <sup>a)</sup>   | t. °C | Type data                                                                                                | DT <sub>50</sub> /DT <sub>90</sub> whole sys. | St. ( $\chi^2$ ) | DT <sub>50</sub> /DT <sub>90</sub> water                                                                                                   | St. ( $\chi^2$ ) | DT <sub>50</sub> /DT <sub>90</sub> sed | St. ( $\chi^2$ )                                                                                                                                                           | Method of calculation                    |  |
| Millstream Pond (Study report No. 535/26-1015) | 6.88 ± 0.05                                     | 7.7 (H <sub>2</sub> O) | 20    | triggers                                                                                                 | 12.2/40.4                                     | 3.9              | 2.6/8.7                                                                                                                                    | 7.1              | 17.0/56.5                              | 2.5                                                                                                                                                                        | SFO, level P-I                           |  |
|                                                |                                                 |                        |       | modelling                                                                                                | NR <sup>c)</sup>                              | NR <sup>c)</sup> | 1000                                                                                                                                       | NA <sup>d)</sup> | 12.2                                   | NA <sup>d)</sup>                                                                                                                                                           | SFO, level P-II, 1 <sup>st</sup> default |  |
| Iron Hatch (Study report No. 535/26-1015)      | 7.40 ± 0.05                                     | 8.0 (H <sub>2</sub> O) | 20    | triggers                                                                                                 | 21.5/71.4                                     | 4.9              | 9.9/33.0                                                                                                                                   | 6.4              | 29.6/98.3                              | 6.4                                                                                                                                                                        | SFO, level P-I                           |  |
|                                                |                                                 |                        |       | modelling                                                                                                | NR <sup>c)</sup>                              | NR <sup>c)</sup> | 1000                                                                                                                                       | NA <sup>d)</sup> | 21.5                                   | NA <sup>d)</sup>                                                                                                                                                           | SFO, level P-II, 1 <sup>st</sup> default |  |
| <b>Geometric mean at 20°C<sup>b)</sup></b>     |                                                 |                        |       | <b>Step 1<br/>Level P-I<br/>Total System<br/>DegT<sub>50</sub> modelling<br/>= 16.2 d (geomean), SFO</b> |                                               |                  | <b>Step 2<br/>Level P-I<br/>DT<sub>50</sub> modelling<br/>= 16.2 d for both compartments (geomean DegT<sub>50</sub> total system), SFO</b> |                  |                                        | <b>Steps 3 and 4<br/>DT<sub>50</sub> water modelling<br/>= 1000 days<br/>DT<sub>50</sub> sediment modelling<br/>= 16.2 d (geomean DegT<sub>50</sub> total system), SFO</b> |                                          |  |

<sup>a)</sup> Measured in [medium to be stated, usually calcium chloride solution or water]

<sup>b)</sup> Normalised using a Q10 of 2.58

<sup>c)</sup> NR = not relevant

<sup>d)</sup> NA = not applicable

|                                                            |                                                                                                                                                                                                                                                                                                                                                                                                                                                                                                                                                              |                      |       |                                               |                  |                                          |                  |                                        |                  |                       |
|------------------------------------------------------------|--------------------------------------------------------------------------------------------------------------------------------------------------------------------------------------------------------------------------------------------------------------------------------------------------------------------------------------------------------------------------------------------------------------------------------------------------------------------------------------------------------------------------------------------------------------|----------------------|-------|-----------------------------------------------|------------------|------------------------------------------|------------------|----------------------------------------|------------------|-----------------------|
| Metabolite X                                               | Distribution (e.g. max in water x after n d. Max. sed x % after n d). Max in total system x % after n days, kinetic formation fraction ( $k_f/k_{dp}$ ): where possible indicate a value for each experiment, clarifying whether fraction was derived for whole system or sediment and or water compartments. The identity of the precursor should also be included (e.g. from parent). Arithmetic mean of kinetic formation fractions to be stated. When calculating arithmetic means, the compartments: whole system, water, sediment should not be mixed. |                      |       |                                               |                  |                                          |                  |                                        |                  |                       |
| Water / sediment system                                    | pH water phase                                                                                                                                                                                                                                                                                                                                                                                                                                                                                                                                               | pH sed <sup>a)</sup> | t. °C | DT <sub>50</sub> /DT <sub>90</sub> whole sys. | St. ( $\chi^2$ ) | DT <sub>50</sub> /DT <sub>90</sub> water | St. ( $\chi^2$ ) | DT <sub>50</sub> /DT <sub>90</sub> sed | St. ( $\chi^2$ ) | Method of calculation |
| No chromatographically resolved metabolites exceeded 5% AR |                                                                                                                                                                                                                                                                                                                                                                                                                                                                                                                                                              |                      |       |                                               |                  |                                          |                  |                                        |                  |                       |
|                                                            |                                                                                                                                                                                                                                                                                                                                                                                                                                                                                                                                                              |                      |       |                                               |                  |                                          |                  |                                        |                  |                       |
|                                                            |                                                                                                                                                                                                                                                                                                                                                                                                                                                                                                                                                              |                      |       |                                               |                  |                                          |                  |                                        |                  |                       |
| Geometric mean at 20°C <sup>b)</sup>                       |                                                                                                                                                                                                                                                                                                                                                                                                                                                                                                                                                              |                      |       |                                               |                  |                                          |                  |                                        |                  |                       |

<sup>a)</sup> Measured in [medium to be stated, usually calcium chloride solution or water]

<sup>b)</sup> Normalised using a Q10 of 2.58

| Mineralisation and non-extractable residues (from parent dosed experiments) |                |                        |                                                    |                                                    |                                                                         |
|-----------------------------------------------------------------------------|----------------|------------------------|----------------------------------------------------|----------------------------------------------------|-------------------------------------------------------------------------|
| Water / sediment system                                                     | pH water phase | pH sed                 | Mineralisation x % after 100 d. (end of the study) | Non-extractable residues in sed. max x % after x d | Non-extractable residues in sed. max x % after 100 d (end of the study) |
| Millstream Pond (Study report No. 535/26-1015)                              | 6.88 ± 0.05    | 7.7 (H <sub>2</sub> O) | 5.55                                               | 84.28 (100 d)                                      | 84.28                                                                   |
| Iron Hatch (Study report No. 535/26-1015)                                   | 7.40 ± 0.05    | 8.0 (H <sub>2</sub> O) | 14.61                                              | 67.52 (100 d)                                      | 67.52                                                                   |

### Fate and behaviour in air (Regulation (EU) N° 283/2013, Annex Part A, point 7.3.1)

|                                            |                                                                                                                                                                                                                     |
|--------------------------------------------|---------------------------------------------------------------------------------------------------------------------------------------------------------------------------------------------------------------------|
| Direct photolysis in air                   | Not studied                                                                                                                                                                                                         |
| Photochemical oxidative degradation in air | DT <sub>50</sub> of 0.5 hours derived by the Atkinson model (SANCO/1412/2001/01-Final).<br>The OH radicals concentration and day length values were 1.5 x 10 <sup>6</sup> cm <sup>-3</sup> (Flack, 1997, CA 2.8/01) |
| Volatilisation                             | /                                                                                                                                                                                                                   |
|                                            | from soil surfaces (BBA guideline): /                                                                                                                                                                               |
| Metabolites                                | No metabolite of concern                                                                                                                                                                                            |

### Residues requiring further assessment (Regulation (EU) N° 283/2013, Annex Part A, point 7.4.1)

|                                                                                                    |                   |
|----------------------------------------------------------------------------------------------------|-------------------|
| Environmental occurring residues requiring further assessment by other disciplines (toxicology and | Soil: mepanipyrim |
|----------------------------------------------------------------------------------------------------|-------------------|

ecotoxicology) and or requiring consideration for groundwater exposure

Surface water: mepanipyrim  
Sediment: mepanipyrim  
Ground water: mepanipyrim  
Air: mepanipyrim

#### Definition of the residue for monitoring (Regulation (EU) N° 283/2013, Annex Part A, point 7.4.2)

See section 5, Ecotoxicology

#### Monitoring data, if available (Regulation (EU) N° 283/2013, Annex Part A, point 7.5)

Soil (indicate location and type of study)

/

Surface water (indicate location and type of study)

/

Ground water (indicate location and type of study)

/

Air (indicate location and type of study)

Meplanipyrim was detected in all samples but at very low levels (0.18 to 0.44 ng/m<sup>3</sup>)  
Atmospheric samples, Strasbourg, France,  
Environmental Pollution 158 (2010) 576-584

#### PEC soil (Regulation (EU) N° 284/2013, Annex Part A, points 9.1.3 / 9.3.1)

Parent

DT<sub>50</sub> (d): 82.1 days

Method of calculation

Kinetics: SFO

Field or Lab: representative worst case trigger value from field studies (Graham, 2016a, Vol. 3 A.S – B.8)

Application data

Crops: grapevines, strawberries, tomatoes

Depth of soil layer: 5cm

Soil bulk density: 1.5g/cm<sup>3</sup>

% plant interception: 70% for grapevines (flowering), 60% for strawberries (BBCH 60-89), 80% for tomatoes (BBCH 61-89)

Number of applications: 1 for grapevines, 1-2 for strawberries and tomatoes

Interval (d): NA for grapevines, 7 days for strawberries and tomatoes

Application rate(s): 600 g a.s./ha for grapevines, 400 g a.s./ha for strawberries and tomatoes (corrected application rates: 180 g a.s./ha for grapevines, 160 g a.s./ha for strawberries, 80 g a.s./ha for tomatoes)

| PEC <sub>(s)</sub><br>(mg/kg) | Grapevines<br>1 x 600g<br>a.i/ha                                                                |       | Strawberries<br>1 x 400g<br>a.i/ha |       | Strawberries<br>2 x 400g<br>a.i/ha                                                             |       | Tomatoes<br>1 x 400g<br>a.i/ha |       | Tomatoes<br>2 x 400g<br>a.i/ha                                                                 |       |
|-------------------------------|-------------------------------------------------------------------------------------------------|-------|------------------------------------|-------|------------------------------------------------------------------------------------------------|-------|--------------------------------|-------|------------------------------------------------------------------------------------------------|-------|
|                               | Actual                                                                                          | TWA   | Actual                             | TWA   | Actual                                                                                         | TWA   | Actual                         | TWA   | Actual                                                                                         | TWA   |
| Initial                       | 0.240                                                                                           |       | 0.213                              |       | 0.414                                                                                          |       | 0.107                          |       | 0.207                                                                                          |       |
| Short term 24h                | 0.238                                                                                           | 0.239 | 0.212                              | 0.212 | 0.411                                                                                          | 0.413 | 0.106                          | 0.106 | 0.205                                                                                          | 0.206 |
| 2d                            | 0.236                                                                                           | 0.238 | 0.210                              | 0.212 | 0.407                                                                                          | 0.411 | 0.105                          | 0.106 | 0.204                                                                                          | 0.205 |
| 4d                            | 0.232                                                                                           | 0.236 | 0.206                              | 0.210 | 0.401                                                                                          | 0.408 | 0.103                          | 0.105 | 0.200                                                                                          | 0.204 |
| Long term 7d                  | 0.226                                                                                           | 0.233 | 0.201                              | 0.207 | 0.391                                                                                          | 0.402 | 0.101                          | 0.104 | 0.195                                                                                          | 0.201 |
| 28d                           | 0.189                                                                                           | 0.214 | 0.168                              | 0.190 | 0.327                                                                                          | 0.369 | 0.084                          | 0.095 | 0.164                                                                                          | 0.185 |
| 50d                           | 0.157                                                                                           | 0.196 | 0.140                              | 0.174 | 0.272                                                                                          | 0.338 | 0.070                          | 0.087 | 0.136                                                                                          | 0.169 |
| 100d                          | 0.103                                                                                           | 0.162 | 0.092                              | 0.144 | 0.178                                                                                          | 0.280 | 0.046                          | 0.072 | 0.089                                                                                          | 0.140 |
| Plateau concentration         | Maximum peak concentration:<br>0.252<br>Baseline concentration:<br>0.0112 mg/kg<br>After 1 year |       |                                    |       | Maximum peak concentration:<br>0.434<br>Baseline concentration:<br>0.021 mg/kg<br>After 1 year |       |                                |       | Maximum peak concentration:<br>0.217<br>Baseline concentration:<br>0.011 mg/kg<br>After 1 year |       |

|                                     |                                                                                                                                                                |                                             |                                |                                               |
|-------------------------------------|----------------------------------------------------------------------------------------------------------------------------------------------------------------|---------------------------------------------|--------------------------------|-----------------------------------------------|
| Metabolite I                        | Molecular weight relative to the parent:<br>DT <sub>50</sub> (d): x days<br>Kinetics: SFO<br>Field or Lab: representative worst case from field studies.       |                                             |                                |                                               |
| Method of calculation               |                                                                                                                                                                |                                             |                                |                                               |
| Application data                    | Application rate assumed: x g/ha (assumed Met I is formed at a maximum of x % of the applied dose) or formation fraction (if sequential modelling is employed) |                                             |                                |                                               |
| <b>PEC<sub>(s)</sub></b><br>(mg/kg) | Single application<br>Actual                                                                                                                                   | Single application<br>Time weighted average | Multiple application<br>Actual | Multiple application<br>Time weighted average |
| Initial                             | <b>No major metabolites</b>                                                                                                                                    |                                             |                                |                                               |
| Short term 24h                      |                                                                                                                                                                |                                             |                                |                                               |
| 2d                                  |                                                                                                                                                                |                                             |                                |                                               |
| 4d                                  |                                                                                                                                                                |                                             |                                |                                               |
| Long term 7d                        |                                                                                                                                                                |                                             |                                |                                               |
| 28d                                 |                                                                                                                                                                |                                             |                                |                                               |
| 50d                                 |                                                                                                                                                                |                                             |                                |                                               |
| 100d                                |                                                                                                                                                                |                                             |                                |                                               |
| Plateau concentration               | x mg/kg after n yr                                                                                                                                             |                                             |                                |                                               |

## PEC ground water (Regulation (EU) N° 284/2013, Annex Part A, point 9.2.4.1)

Method of calculation and type of study (e.g. modelling, field leaching, lysimeter)

For FOCUS gw modelling, values used –  
 Modelling using FOCUS model(s), with appropriate FOCUSgw scenarios, according to FOCUS guidance.  
 Model(s) used: FOCUS PEARL (version 4.4.4), FOCUS PELMO (version 4.4.3), FOCUS MACRO (version 5.5.3)  
 Crops: grapevines, strawberries, tomatoes  
 Crop uptake factor: /  
 Water solubility (mg/L): 3.1 at pH 7 and 20°C  
 Vapour pressure: 2.32 x 10<sup>-5</sup> Pa at 25°C  
 Geometric mean parent DT50 field 59.2 d (normalisation to 10kPa or pF2, 20 °C with Q10 of 2.58 and Walker equation coefficient 0.7 for PELMO and PEARL and 0.49 for MACRO 5.5.3)\*.  
 KOC: parent, geometric mean 1177 mL/g, arithmetic mean 1/n= 0.83.  
 Metabolites: no major metabolite

For field and lysimeter studies  
 Location: Europe (Netherlands, France, Spain, Italy)  
 Study type (e.g. lysimeter, field): field  
 Soil properties:

Netherlands  
 pH = 6.3, OC= 1.4, MWHC = /

France  
 pH = 7.5, OC= 1.1, MWHC = /

Spain  
 pH = 9.1, OC= 0.8, MWHC = /

Italy  
 pH = 8.7, OC= 1.2, MWHC = /

Dates of application :  
 grapevines: summer, autumn  
 strawberries: spring/summer, summer  
 tomatoes: early summer, late summer  
 Crop : Interception estimated: grapevines (0.60, 0.75), strawberries (0.60, 0.60), tomatoes (0.80, 0.50)  
 Number of applications: 1 year, 1 application per year for grapevines, 1-2 applications per year for strawberries and tomatoes  
 Duration: one season  
 Daily weather data (air temperature range and rainfall) throughout the field phase were collected from regional weather stations located within a distance of 5 – 20 km from the trial sites.

Average annual leachate volume (mm): unknown

## Application rate

Gross application rate: 600 g/ha for grapevines, 400 g/ha for strawberries and tomatoes

Crop growth stage: 77 (summer)/89 (autumn) for grapevines, 60 (spring/summer)/89 (summer) for strawberries, 61 (early summer)/89 (late summer) for tomatoes

Canopy interception %: grapevines: 0.60/0.75, strawberries: 0.60/0.60, tomatoes: 0.80/0.50

Application rate net of interception: grapevines: 240/150 g/ha, strawberries: 160/160 g/ha, tomatoes: 80/200 g/ha

No. of applications: 1 for grapevines, 1-2 for strawberries and tomatoes

Time of application (absolute or relative application dates): please refer to table B.2.4.1-3 in Vol. 3 CP B.8

\* Geometric mean DT50 of 90.6 d derived by pooling laboratory and field data should be used for future simulations.

| Crop         | Scenario      | Application timing | Predicted 80 <sup>th</sup> percentile average annual concentrations (µg/L) |         |         |
|--------------|---------------|--------------------|----------------------------------------------------------------------------|---------|---------|
|              |               |                    | PEARL                                                                      | PELMO   | MACRO   |
| Grapevines   | Châteaudun    | Summer             | < 0.001                                                                    | < 0.001 | < 0.001 |
|              |               | Autumn             | < 0.001                                                                    | < 0.001 | < 0.001 |
|              | Hamburg       | Summer             | < 0.001                                                                    | < 0.001 | NA      |
|              |               | Autumn             | < 0.001                                                                    | < 0.001 | NA      |
|              | Kremsmünster  | Summer             | < 0.001                                                                    | < 0.001 | NA      |
|              |               | Autumn             | < 0.001                                                                    | < 0.001 | NA      |
|              | Piacenza      | Summer             | < 0.001                                                                    | < 0.001 | NA      |
|              |               | Autumn             | < 0.001                                                                    | < 0.001 | NA      |
|              | Porto         | Summer             | < 0.001                                                                    | < 0.001 | NA      |
|              |               | Autumn             | < 0.001                                                                    | < 0.001 | NA      |
|              | Sevilla       | Summer             | < 0.001                                                                    | < 0.001 | NA      |
|              |               | Autumn             | < 0.001                                                                    | < 0.001 | NA      |
| Thiva        | Summer        | < 0.001            | < 0.001                                                                    | NA      |         |
|              | Autumn        | < 0.001            | < 0.001                                                                    | NA      |         |
| Strawberries | Hamburg       | Spring/summer      | < 0.001                                                                    | < 0.001 | < 0.001 |
|              |               | Summer             | < 0.001                                                                    | < 0.001 | < 0.001 |
|              | Jokioinen     | Spring/summer      | < 0.001                                                                    | < 0.001 | NA      |
|              |               | Summer             | < 0.001                                                                    | < 0.001 | NA      |
|              | Kremsmünster  | Spring/summer      | < 0.001                                                                    | < 0.001 | NA      |
|              |               | Summer             | < 0.001                                                                    | < 0.001 | NA      |
| Sevilla      | Spring/summer | < 0.001            | < 0.001                                                                    | NA      |         |
|              | Summer        | < 0.001            | < 0.001                                                                    | NA      |         |
| Tomatoes     | Châteaudun    | Early summer       | < 0.001                                                                    | < 0.001 | < 0.001 |
|              |               | Late summer        | < 0.001                                                                    | < 0.001 | < 0.001 |
|              | Piacenza      | Early summer       | < 0.001                                                                    | < 0.001 | NA      |
|              |               | Late summer        | < 0.001                                                                    | < 0.001 | NA      |
|              | Porto         | Early summer       | < 0.001                                                                    | < 0.001 | NA      |
|              |               | Late summer        | < 0.001                                                                    | < 0.001 | NA      |
|              | Sevilla       | Early summer       | < 0.001                                                                    | < 0.001 | NA      |
|              |               | Late summer        | < 0.001                                                                    | < 0.001 | NA      |
| Thiva        | Early summer  | < 0.001            | < 0.001                                                                    | NA      |         |
|              | Late summer   | < 0.001            | < 0.001                                                                    | NA      |         |



**PEC<sub>(gw)</sub>** From lysimeter / field studies

| Parent                | 1 <sup>st</sup> year | 2 <sup>nd</sup> year | 3 <sup>rd</sup> year |
|-----------------------|----------------------|----------------------|----------------------|
| Annual average (µg/L) | /                    | /                    | /                    |

  

| Metabolite X          | 1 <sup>st</sup> year        | 2 <sup>nd</sup> year | 3 <sup>rd</sup> year |
|-----------------------|-----------------------------|----------------------|----------------------|
| Annual average (µg/L) | <b>No major metabolites</b> |                      |                      |

**PEC surface water and PEC sediment (Regulation (EU) N° 284/2013, Annex Part A, points 9.2.5 / 9.3.1)**

Parent

Parameters used in FOCUS<sub>s</sub>w step 1 and 2

Version control no. of FOCUS calculator:

Molecular weight (g/mol): 223.3

K<sub>OC</sub>/K<sub>OM</sub> (mL/g): 1177/682.6 (geomean, n = 5)DT<sub>50</sub> soil (d): 59.2 days (field, in accordance with FOCUS SFO)\*DT<sub>50</sub> water/sediment system @ 20°C (d): 16.2 d (highest DT<sub>50</sub> (total system) of 2 water/sediment systems)DT<sub>50</sub> water @ 20°C (d): 1000 (worst-case default value according to FOCUS recommendation)DT<sub>50</sub> sediment @ 20°C (d): 16.2 (highest DT<sub>50</sub> (total system) of 2 water/sediment systems)

Crop interception (%): vines 60%, strawberries 40%, tomatoes 70% (the agreed % was max. 70 % for all crops)

Parameters used in FOCUS<sub>s</sub>w step 3 (if performed)

Version control no.'s of FOCUS software: FOCUS PRZM, MACRO and TOXSWA

Water solubility @ 20°C (mg/L): 3.1

Vapour pressure: 1.21 x 10<sup>-5</sup> Pa at 20°CK<sub>om</sub>/K<sub>oc</sub> (mL/g): 682.6/1177 (geomean, n = 5)

1/n: (Freundlich isotherm exponent) 0.83 (arithmetic mean, n = 5)

Q10=2.58, Walker equation coefficient 0.7

Crop uptake factor: 0.0 (default value for non-systemic compounds)

Application rate

Crop and growth stage: vines, strawberries, tomatoes (for application dates and growth stages please refer to study report No. WP13101, Peeters, 2016b)

Number of applications: 1 for vines, 1-2 for strawberries and tomatoes

Interval (d): for application dates please refer to study report No. WP13101, Peeters, 2016b

Application rate(s): 600 g a.s./ha for vines, 400 g a.s./ha for strawberries and tomatoes

Application window:

Grapevines:

1. First possible summer application after maximum leaf

area development

2. Last possible autumn application 21 days before harvest date

Strawberries:

1. Last possible spring application 1 day before harvest date

2. Last possible summer application 1 day before harvest date

Tomatoes

1. Last possible summer application 1 day before harvest date

\* Geometric mean DT50 of 90.6 d derived by pooling laboratory and field data should be used for future simulations.

| FOCUS Step for vines                        | summer application | Water              |                | Sediment            |                 |
|---------------------------------------------|--------------------|--------------------|----------------|---------------------|-----------------|
|                                             |                    | Global max. (µg/L) | TWAC 7d (µg/L) | Global max. (µg/kg) | TWAC 7d (µg/kg) |
| 1                                           | all                | 93.90              | 73.37          | 916.2               | 850             |
| 2                                           | Northern Europe    | 16.06              | 10.75          | 131.9               | 120.5           |
| 2                                           | Southern Europe    | 16.35              | 13.84          | 165.4               | 151.2           |
| 3                                           | D6 – ditch (D6d)   | 10.28              | 7.446          | 18.61               | 17.62           |
|                                             | R1 – pond (R1p)    | 0.367              | 0.329          | 1.550               | 1.547           |
|                                             | R1 – stream (R1s)  | 7.333              | 0.151          | 0.656               | 0.483           |
|                                             | R2 – stream (R2s)  | 10.11              | 0.154          | 0.814               | 0.516           |
|                                             | R3 – stream (R3s)  | 10.63              | 0.565          | 2.711               | 1.659           |
|                                             | R4 – stream (R4s)  | 7.537              | 0.258          | 1.394               | 0.929           |
| 4<br>20 m<br>no-<br>spray<br>buffer<br>zone | D6 – ditch (D6d)   | 0.821              | 0.626          | 1.851               | 1.756           |
|                                             | R1 – pond (R1p)    | 0.128              | 0.118          | 0.593               | 0.592           |
|                                             | R1 – stream (R1s)  | 0.700              | 0.019          | 0.105               | 0.078           |
|                                             | R2 – stream (R2s)  | 0.963              | 0.016          | 0.081               | 0.058           |
|                                             | R3 – stream (R3s)  | 1.003              | 0.058          | 0.280               | 0.194           |
|                                             | R4 – stream (R4s)  | 0.723              | 0.059          | 0.307               | 0.211           |

| FOCUS Step for vines                    | autumn application | Water              |                | Sediment            |                 |
|-----------------------------------------|--------------------|--------------------|----------------|---------------------|-----------------|
|                                         |                    | Global max. (µg/L) | TWAC 7d (µg/L) | Global max. (µg/kg) | TWAC 7d (µg/kg) |
| 1                                       | all                | 93.90              | 73.37          | 948.3               | 850.0           |
| 2                                       | Northern Europe    | 22.29              | 19.40          | 232.4               | 212.4           |
| 2                                       | Southern Europe    | 19.32              | 16.62          | 198.9               | 181.8           |
| 3                                       | D6 – ditch (D6d)   | 10.28              | 7.451          | 18.79               | 17.82           |
|                                         | R1 – pond (R1p)    | 0.366              | 0.329          | 1.872               | 1.871           |
|                                         | R1 – stream (R1s)  | 7.538              | 0.226          | 1.171               | 0.777           |
|                                         | R3 – stream (R3s)  | 10.63              | 0.661          | 5.617               | 4.636           |
| 4<br>20 m<br>no-spray<br>buffer<br>zone | D6 – ditch (D6d)   | 2.127              | 0.619          | 1.847               | 1.755           |
|                                         | R1 – pond (R1p)    | 0.127              | 0.117          | 0.711               | 0.711           |
|                                         | R1 – stream (R1s)  | 0.719              | 0.023          | 0.118               | 0.089           |
|                                         | R3 – stream (R3s)  | 0.999              | 0.157          | 0.862               | 0.683           |

| FOCUS Step for strawberries           | multiple spring applications | Water              |                | Sediment               |                        |
|---------------------------------------|------------------------------|--------------------|----------------|------------------------|------------------------|
|                                       |                              | Global max. (µg/L) | TWAC 7d (µg/L) | Global max. (µg/kg)    | TWAC 7d (µg/kg)        |
| 1                                     | all                          | 111.1              | 92.49          | 1.22 x 10 <sup>3</sup> | 1.08 x 10 <sup>3</sup> |
| 2                                     | Southern Europe              | 25.26              | 23.08          | 285.1                  | 260.5                  |
| 3                                     | D6 – ditch (D6d)             | 2.223              | 0.426          | 2.497                  | 2.015                  |
|                                       | R2 – stream (R2s)            | 1.909              | 0.130          | 17.44                  | 15.12                  |
|                                       | R3 – stream (R3s)            | 3.427              | 0.460          | 2.482                  | 2.134                  |
|                                       | R4 stream (R4s)              | 6.186              | 1.528          | 10.36                  | 8.318                  |
| 4<br>20 m<br>vegetated<br>buffer zone | D6 – ditch (D6d)             | 0.320              | 0.115          | 0.546                  | 0.527                  |
|                                       | R2 – stream (R2s)            | 0.247              | 0.030          | 1.019                  | 0.876                  |
|                                       | R3 – stream (R3s)            | 0.809              | 0.106          | 0.500                  | 0.420                  |
|                                       | R4 - stream (R4s)            | 1.460              | 0.360          | 1.963                  | 1.548                  |

| FOCUS Step for strawberries           | single spring application | Water              |                | Sediment            |                 |
|---------------------------------------|---------------------------|--------------------|----------------|---------------------|-----------------|
|                                       |                           | Global max. (µg/L) | TWAC 7d (µg/L) | Global max. (µg/kg) | TWAC 7d (µg/kg) |
| 1                                     | all                       | 55.57              | 46.24          | 610.8               | 541.2           |
| 2                                     | Southern Europe           | 13.59              | 12.38          | 152.5               | 139.6           |
| 3                                     | D6 – ditch (D6d)          | 2.536              | 0.484          | 2.104               | 1.645           |
|                                       | R2 – stream (R2s)         | 2.208              | 0.064          | 10.37               | 9.036           |
|                                       | R3 – stream (R3s)         | 2.349              | 0.260          | 1.474               | 1.264           |
|                                       | R4 - stream (R4s)         | 3.011              | 0.806          | 6.053               | 4.927           |
| 4<br>20 m<br>vegetated<br>buffer zone | D6 – ditch (D6d)          | 0.189              | 0.061          | 0.321               | 0.311           |
|                                       | R2 – stream (R2s)         | 0.227              | 0.015          | 0.592               | 0.513           |
|                                       | R3 – stream (R3s)         | 0.428              | 0.057          | 0.270               | 0.221           |
|                                       | R4 - stream (R4s)         | 0.710              | 0.191          | 1.061               | 0.845           |

| FOCUS Step for strawberries | multiple summer applications | Water              |                | Sediment               |                        |
|-----------------------------|------------------------------|--------------------|----------------|------------------------|------------------------|
|                             |                              | Global max. (µg/L) | TWAC 7d (µg/L) | Global max. (µg/kg)    | TWAC 7d (µg/kg)        |
| 1                           | all                          | 111.1              | 92.49          | 1.22 x 10 <sup>3</sup> | 1.08 x 10 <sup>3</sup> |
| 2                           | Northern Europe              | 14.21              | 12.75          | 155.1                  | 143.5                  |
| 3                           | Southern Europe              | 19.92              | 18.09          | 222.3                  | 203.9                  |
| 3                           | D3 – ditch (D3d)             | 2.212              | 0.319          | 1.794                  | 1.361                  |

|                                       |                   |       |       |       |       |
|---------------------------------------|-------------------|-------|-------|-------|-------|
|                                       | D4 – pond (D4p)   | 0.121 | 0.111 | 1.033 | 1.033 |
|                                       | D4 – stream (D4s) | 1.716 | 0.089 | 0.348 | 0.306 |
|                                       | D6 – ditch (D6d)  | 3.109 | 2.019 | 6.863 | 6.523 |
|                                       | R1 – pond (R1p)   | 0.524 | 0.489 | 3.947 | 3.945 |
|                                       | R1 - stream (R1s) | 3.196 | 0.364 | 8.961 | 7.560 |
| 4<br>20 m<br>vegetated<br>buffer zone | D3 – ditch (D3d)  | 0.151 | 0.025 | 0.157 | 0.126 |
|                                       | D4 – pond (D4p)   | 0.098 | 0.092 | 0.765 | 0.765 |
|                                       | D4 – stream (D4s) | 0.357 | 0.089 | 0.344 | 0.301 |
|                                       | D6 – ditch (D6d)  | 0.464 | 0.154 | 0.622 | 0.592 |
|                                       | R1 – pond (R1p)   | 0.131 | 0.122 | 0.953 | 0.952 |
|                                       | R1 - stream (R1s) | 0.754 | 0.084 | 0.766 | 0.609 |

| FOCUS Step<br>for<br>strawberries     | single summer<br>application | Water                    |                   | Sediment               |                    |
|---------------------------------------|------------------------------|--------------------------|-------------------|------------------------|--------------------|
|                                       |                              | Global<br>max.<br>(µg/L) | TWAC 7d<br>(µg/L) | Global max.<br>(µg/kg) | TWAC 7d<br>(µg/kg) |
| 1                                     | all                          | 55.57                    | 46.24             | 610.7                  | 541.1              |
| 2                                     | Northern Europe              | 7.646                    | 6.820             | 82.57                  | 76.70              |
| 2                                     | Southern Europe              | 10.62                    | 9.599             | 117.5                  | 108.1              |
| 3                                     | D3 – ditch (D3d)             | 2.527                    | 0.347             | 1.479                  | 1.082              |
|                                       | D4 – pond (D4p)              | 0.087                    | 0.077             | 0.505                  | 0.504              |
|                                       | D4 – stream (D4s)            | 1.791                    | 0.032             | 0.134                  | 0.117              |
|                                       | D6 – ditch (D6d)             | 2.551                    | 1.811             | 4.687                  | 4.399              |
|                                       | R1 – pond (R1p)              | 0.447                    | 0.408             | 2.226                  | 2.223              |
|                                       | R1 - stream (R1s)            | 1.733                    | 0.360             | 8.948                  | 7.485              |
| 4<br>20 m<br>vegetated<br>buffer zone | D3 – ditch (D3d)             | 0.188                    | 0.029             | 0.130                  | 0.102              |
|                                       | D4 – pond (D4p)              | 0.039                    | 0.036             | 0.338                  | 0.338              |
|                                       | D4 – stream (D4s)            | 0.181                    | 0.032             | 0.132                  | 0.116              |
|                                       | D6 – ditch (D6d)             | 0.196                    | 0.148             | 0.444                  | 0.417              |
|                                       | R1 – pond (R1p)              | 0.108                    | 0.098             | 0.572                  | 0.571              |
|                                       | R1 - stream (R1s)            | 0.413                    | 0.083             | 0.736                  | 0.585              |

| FOCUS Step<br>for<br>tomatoes         | multiple summer<br>applications | Water                    |                   | Sediment               |                        |
|---------------------------------------|---------------------------------|--------------------------|-------------------|------------------------|------------------------|
|                                       |                                 | Global<br>max.<br>(µg/L) | TWAC 7d<br>(µg/L) | Global max.<br>(µg/kg) | TWAC 7d<br>(µg/kg)     |
| 1                                     | all                             | 111.1                    | 92.49             | 1.22 x 10 <sup>3</sup> | 1.08 x 10 <sup>3</sup> |
| 2                                     | Southern Europe                 | 11.36                    | 10.08             | 121.5                  | 113.3                  |
| 3                                     | D6 – ditch (D6d)                | 2.191                    | 0.163             | 0.820                  | 0.562                  |
|                                       | R2 – stream (R2s)               | 1.939                    | 0.126             | 36.78                  | 34.91                  |
|                                       | R3 – stream (R3s)               | 3.450                    | 0.807             | 9.734                  | 7.644                  |
|                                       | R4 - stream (R4s)               | 5.336                    | 0.645             | 5.154                  | 3.628                  |
| 4<br>20 m<br>vegetated<br>buffer zone | D6 – ditch (D6d)                | 0.520                    | 0.085             | 0.426                  | 0.362                  |
|                                       | R2 – stream (R2s)               | 0.188                    | 0.029             | 2.016                  | 1.922                  |
|                                       | R3 – stream (R3s)               | 0.824                    | 0.194             | 1.052                  | 0.781                  |
|                                       | R4 - stream (R4s)               | 1.271                    | 0.148             | 1.007                  | 0.695                  |

| FOCUS Step<br>for<br>tomatoes | single summer<br>application | Water                    |                   | Sediment               |                    |
|-------------------------------|------------------------------|--------------------------|-------------------|------------------------|--------------------|
|                               |                              | Global<br>max.<br>(µg/L) | TWAC 7d<br>(µg/L) | Global max.<br>(µg/kg) | TWAC 7d<br>(µg/kg) |
| 1                             | all                          | 55.57                    | 46.24             | 610.7                  | 541.1              |
| 2                             | Southern Europe              | 6.160                    | 5.430             | 65.13                  | 59.51              |
| 3                             | D6 – ditch (D6d)             | 2.499                    | 0.153             | 0.737                  | 0.492              |
|                               | R2 – stream (R2s)            | 2.243                    | 0.046             | 18.44                  | 17.56              |
|                               | R3 – stream (R3s)            | 2.358                    | 0.338             | 5.743                  | 4.806              |

|             |                   |       |       |       |       |
|-------------|-------------------|-------|-------|-------|-------|
|             | R4 - stream (R4s) | 2.448 | 0.325 | 2.461 | 1.804 |
| 4           | D6 – ditch (D6d)  | 0.186 | 0.024 | 0.129 | 0.110 |
| 20 m        | R2 – stream (R2s) | 0.232 | 0.010 | 0.992 | 0.950 |
| vegetated   | R3 – stream (R3s) | 0.365 | 0.081 | 0.539 | 0.440 |
| buffer zone | R4 - stream (R4s) | 0.583 | 0.071 | 0.462 | 0.334 |

Metabolite **No major metabolites**

**Estimation of concentrations from other routes of exposure (Regulation (EU) N° 284/2013, Annex Part A, point 9.4)**

Method of calculation

No study available, Atmospheric exposure resulting from other routes of exposure such as dust deposition, amenity use or indirect exposure of surface water via a sewage treatment plant (STP) after application of the plant protection product in storage rooms, is not anticipated in accordance with the uses of the Frupica® WP formulation in agricultural crops as proposed. Therefore, further information is not required or provided.

**PEC**

Maximum concentration

No data

## Ecotoxicology

### Effects on birds and other terrestrial vertebrates (Regulation (EU) N° 283/2013, Annex Part A, point 8.1 and Regulation (EU) N° 284/2013, Annex Part A, point 10.1)

| Species                                                                                                                                                                                                                                                                                                        | Test substance | Time scale | End point            | Toxicity<br>(mg/kg bw per day)                  |
|----------------------------------------------------------------------------------------------------------------------------------------------------------------------------------------------------------------------------------------------------------------------------------------------------------------|----------------|------------|----------------------|-------------------------------------------------|
| <b>Birds</b>                                                                                                                                                                                                                                                                                                   |                |            |                      |                                                 |
| Mallard duck<br><i>Anas platyrhynchos</i>                                                                                                                                                                                                                                                                      | a.s.           | Acute      | LD <sub>50</sub>     | > 2250 mg a.s./kg bw                            |
| Bobwhite quail<br><i>Colinus virginianus</i>                                                                                                                                                                                                                                                                   | a.s.           | Acute      | LD <sub>50</sub>     | > 2250 mg a.s./kg bw                            |
| Bobwhite quail<br><i>Colinus virginianus</i>                                                                                                                                                                                                                                                                   | a.s.           | Long-term  | LD <sub>50</sub> /10 | 225.0 mg a.s./kg bw/day                         |
| Bobwhite quail<br><i>Colinus virginianus</i>                                                                                                                                                                                                                                                                   | a.s.           | Long-term  | NOEC                 | 100 mg a.s./kg bw/day                           |
| <b>Mammals</b>                                                                                                                                                                                                                                                                                                 |                |            |                      |                                                 |
| Mouse                                                                                                                                                                                                                                                                                                          | a.s.           | Acute      | LD <sub>50</sub>     | > 5000 mg a.s./kg bw                            |
| Rat                                                                                                                                                                                                                                                                                                            | a.s.           | Acute      | LD <sub>50</sub>     | > 5000 mg a.s./kg bw                            |
| Mouse                                                                                                                                                                                                                                                                                                          | Preparation    | Acute      | LD <sub>50</sub>     | > 5000 mg form./kg bw<br>(= 2650 mg a.s./kg bw) |
| Rat                                                                                                                                                                                                                                                                                                            | Preparation    | Acute      | LD <sub>50</sub>     | > 5000 mg form./kg bw<br>(= 2650 mg a.s./kg bw) |
| Rabbit                                                                                                                                                                                                                                                                                                         | a.s.           | Long-term  | NOAEL                | 10 mg a.s./kg bw/day                            |
| Rat                                                                                                                                                                                                                                                                                                            | a.s.           | Long-term  | NOAEL                | 93 mg/kg bw/day                                 |
| Endocrine disrupting properties (Annex Part A, points 8.1.5)                                                                                                                                                                                                                                                   |                |            |                      |                                                 |
| For the ecotoxicological assessments, no other data were available to address the potential endocrine activity of mepanipyrim. Pending on the outcome of the data gap in Section 2, further ecotoxicological tests might be necessary to address the potential endocrine disrupting properties of mepanipyrim. |                |            |                      |                                                 |

Additional higher tier studies (Annex Part A, points 10.1.1.2):

The applicant provided residue studies in grapevines, strawberry and tomato. From these studies, the highest measured residue value on the fruit, measured directly after the last application, was derived for each crop. The measured residue data on tomato could potentially be used to refine the long-term risk assessment for frugivorous mammals in tomato. The number of studies available (n=9) was however not considered sufficient to override the residue dataset from the EFSA Guidance Document (n = 86). Therefore, the RUD value for tomato could not be refined.

Based on data available from literature, the common vole (*Microtus arvalis*) was initially identified as focal species for small herbivorous mammals in grapevines, strawberry and tomato. However, at Pesticides Peer Review Meeting 154, the experts agreed that the available information is not sufficient for supporting the selection of the common vole as a specific focal species in these crops. A refinement based on biological parameters specific for the common vole (e.g. PD or PT refinements) could not be used in the risk assessment.

Terrestrial vertebrate wildlife (birds, mammals, reptile and amphibians) (Annex Part A, points 8.1.4, 10.1.3):  
No additional data available for mepanipyrim.

### Toxicity/exposure ratios for terrestrial vertebrates (Regulation (EU) N° 284/2013, Part A, Annex point 10.1)

#### Grapevines at BBCH 77-89, 1 x 600 g a.s./ha

| Growth stage                                              | Indicator or focal species           | Time scale | DDD (mg/kg bw per day) | TER               | Trigger |
|-----------------------------------------------------------|--------------------------------------|------------|------------------------|-------------------|---------|
| <b>Screening Step (Birds)</b>                             |                                      |            |                        |                   |         |
| All                                                       | Small omnivorous bird                | Acute      | 57.18                  | >39.3             | 10      |
| All                                                       | Small omnivorous bird                | Long-term  | 12.37                  | 8.1               | 5       |
| <b>Screening Step (Mammals)</b>                           |                                      |            |                        |                   |         |
| All                                                       | Small herbivorous mammal             | Acute      | 81.84                  | >61.1             | 10      |
| All                                                       | Small herbivorous mammal             | Long-term  | 22.99                  | <b>0.43</b>       | 5       |
| <b>Tier 1 (Mammals)</b>                                   |                                      |            |                        |                   |         |
| BBCH ≥ 40                                                 | Large herbivorous mammal "lagomorph" | Long-term  | 1.05                   | 9.5               | 5       |
| BBCH ≥ 20                                                 | Small insectivorous mammal "shrew"   | Long-term  | 0.60                   | 16.6              | 5       |
| BBCH ≥ 40                                                 | Small herbivorous mammal "vole"      | Long-term  | 6.90                   | <b>1.4</b>        | 5       |
| BBCH ≥ 40                                                 | Small omnivorous mammal "mouse"      | Long-term  | 0.73                   | 13.7              | 5       |
| <b>Higher tier (Mammals): -</b>                           |                                      |            |                        |                   |         |
| <b>Risk from bioaccumulation and food chain behaviour</b> |                                      |            |                        |                   |         |
| Indicator or focal species                                |                                      | Time scale | DDD (mg/kg bw per day) | TER               | Trigger |
| Earthworm-eating birds                                    |                                      | Long-term  | 0.266                  | 375               | 5       |
| Earthworm-eating mammals                                  |                                      | Long-term  | 0.325                  | 30.7              | 5       |
| Fish-eating birds                                         |                                      | Long-term  | 0.13                   | 775 <sup>a</sup>  | 5       |
| Fish-eating mammals                                       |                                      | Long-term  | 0.12                   | 86.7 <sup>a</sup> | 5       |
| Higher tier : not required                                |                                      |            |                        |                   |         |
| <b>Risk from consumption of contaminated water</b>        |                                      |            |                        |                   |         |
| Scenarios                                                 | Indicator or focal species           | Time scale | PEC <sub>dw</sub> xDWR | TER               | Trigger |
| Leaf scenario                                             | Birds                                | acute      | Not relevant           |                   | 5       |

| <b>Puddle scenario, Screening step</b>                                                             |         |           |            |                |    |
|----------------------------------------------------------------------------------------------------|---------|-----------|------------|----------------|----|
| 1) Application rate (g a.s./ha)/relevant endpoint <50 (koc<500 L/kg), TER calculation not needed   |         |           |            |                |    |
| 2) Application rate (g a.s./ha)/relevant endpoint <3000 (koc≥500 L/kg), TER calculation not needed |         |           |            |                |    |
| Puddle scenario                                                                                    | Birds   | acute     | Not needed | Case 2 (<0.27) | 10 |
| Puddle scenario                                                                                    | Mammals | acute     | Not needed | Case 2 (<0.12) | 10 |
| Puddle scenario                                                                                    | Birds   | Long-term | Not needed | Case 2 (6.0)   | 5  |
| Puddle scenario                                                                                    | Mammals | Long-term | Not needed | Case 2 (60)    | 5  |

<sup>a</sup> TER value calculated based on a BCF of 980, which was not normalized to 5% lipid content, as it was derived from a study where the lipid content was not measured.

### Strawberries at BBCH 60-89, 2 x 400 g a.s./ha (interval 7 days) (both indoor and outdoor use)

| Growth stage                                              | Indicator or focal species           | Time scale | DDD (mg/kg bw per day)  | TER               | Trigger |
|-----------------------------------------------------------|--------------------------------------|------------|-------------------------|-------------------|---------|
| <b>Screening Step (Birds)</b>                             |                                      |            |                         |                   |         |
| All                                                       | Small omnivorous bird                | Acute      | 88.93                   | >25.3             | 10      |
| All                                                       | Small omnivorous bird                | Long-term  | 21.98                   | <b>4.5</b>        | 5       |
| <b>Tier 1 (Birds)</b>                                     |                                      |            |                         |                   |         |
| BBCH ≥ 40                                                 | Small omnivorous bird "lark"         | Long-term  | 1.49                    | 67.0              | 5       |
| BBCH 61-89                                                | Frugivorous bird "starling"          | Long-term  | 4.55                    | 22.0              | 5       |
| BBCH ≥ 20                                                 | Small insectivorous bird "wagtail"   | Long-term  | 3.29                    | 30.4              | 5       |
| <b>Screening Step (Mammals)</b>                           |                                      |            |                         |                   |         |
| All                                                       | Small herbivorous mammal             | Acute      | 66.30                   | > 75.4            | 10      |
| All                                                       | Small herbivorous mammal             | Long-term  | 16.38                   | <b>0.61</b>       | 5       |
| <b>Tier 1 (Mammals)</b>                                   |                                      |            |                         |                   |         |
| BBCH ≥ 20                                                 | Small insectivorous mammal "shrew"   | Long-term  | 0.64                    | 15.5              | 5       |
| BBCH ≥ 40                                                 | Small herbivorous mammal "vole"      | Long-term  | 9.80                    | <b>1.0</b>        | 5       |
| BBCH ≥ 40                                                 | Large herbivorous mammal "lagomorph" | Long-term  | 1.93                    | 5.2               | 5       |
| BBCH ≥ 40                                                 | Small omnivorous mammal "mouse"      | Long-term  | 1.05                    | 9.5               | 5       |
| <b>Higher tier (Mammals): -</b>                           |                                      |            |                         |                   |         |
| <b>Risk from bioaccumulation and food chain behaviour</b> |                                      |            |                         |                   |         |
| Indicator or focal species                                |                                      | Time scale | DDD (mg/kg bw per day)  | TER               | Trigger |
| Earthworm-eating birds                                    |                                      | Long-term  | 0.460                   | 217               | 5       |
| Earthworm-eating mammals                                  |                                      | Long-term  | 0.561                   | 17.8              | 5       |
| Fish-eating birds                                         |                                      | Long-term  | 0.21                    | 484 <sup>a</sup>  | 5       |
| Fish-eating mammals                                       |                                      | Long-term  | 0.18                    | 54.2 <sup>a</sup> | 5       |
| Higher tier : not required                                |                                      |            |                         |                   |         |
| <b>Risk from consumption of contaminated water</b>        |                                      |            |                         |                   |         |
| Scenarios                                                 | Indicator or focal species           | Time scale | PEC <sub>dw</sub> × DWR | TER               | Trigger |
| Leaf scenario                                             | Birds                                | acute      | Not relevant            |                   | 5       |



| <b>Puddle scenario, Screening step</b>                                                             |         |           |            |                |    |
|----------------------------------------------------------------------------------------------------|---------|-----------|------------|----------------|----|
| 1) Application rate (g a.s./ha)/relevant endpoint <50 (koc<500 L/kg), TER calculation not needed   |         |           |            |                |    |
| 2) Application rate (g a.s./ha)/relevant endpoint <3000 (koc≥500 L/kg), TER calculation not needed |         |           |            |                |    |
| Puddle scenario                                                                                    | Birds   | acute     | Not needed | Case 2 (<0.36) | 10 |
| Puddle scenario                                                                                    | Mammals | acute     | Not needed | Case 2 (<0.16) | 10 |
| Puddle scenario                                                                                    | Birds   | Long-term | Not needed | Case 2 (8.0)   | 5  |
| Puddle scenario                                                                                    | Mammals | Long-term | Not needed | Case 2 (80)    | 5  |

<sup>a</sup> TER value calculated based on a BCF of 980, which was not normalized to 5% lipid content, as it was derived from a study where the lipid content was not measured.

### Tomatoes at BBCH 61-89, 2 x 400 g a.s./ha (interval 7 days) (both indoor and outdoor use)

| Growth stage                                              | Indicator or focal species         | Time scale | DDD (mg/kg bw per day) | TER               | Trigger |
|-----------------------------------------------------------|------------------------------------|------------|------------------------|-------------------|---------|
| <b>Screening Step (Birds)</b>                             |                                    |            |                        |                   |         |
| All                                                       | Small omnivorous bird              | Acute      | 88.93                  | >25.3             | 10      |
| All                                                       | Small omnivorous bird              | Long-term  | 21.98                  | <b>4.5</b>        | 5       |
| <b>Tier 1 (Birds)</b>                                     |                                    |            |                        |                   |         |
| BBCH 71-80                                                | Frugivorous bird "crow"            | Long-term  | 10.85                  | 9.2               | 5       |
| BBCH ≥ 50                                                 | Small granivorous bird "finch"     | Long-term  | 1.15                   | 86.7              | 5       |
| BBCH ≥ 50                                                 | Small omnivorous bird "lark"       | Long-term  | 1.12                   | 89.3              | 5       |
| BBCH 71-80                                                | Frugivorous bird "starling"        | Long-term  | 7.02                   | 14.2              | 5       |
| BBCH ≥ 20                                                 | Small insectivorous bird "wagtail" | Long-term  | 3.29                   | 30.4              | 5       |
| <b>Screening Step (Mammals)</b>                           |                                    |            |                        |                   |         |
| All                                                       | Small herbivorous mammal           | Acute      | 76.38                  | >65.5             | 10      |
| All                                                       | Small herbivorous mammal           | Long-term  | 24.52                  | <b>0.41</b>       | 5       |
| <b>Tier 1 (Mammals)</b>                                   |                                    |            |                        |                   |         |
| BBCH 71-89                                                | Frugivorous mammal "rat"           | Long-term  | 3.17                   | <b>3.16</b>       | 5       |
| BBCH ≥ 20                                                 | Small insectivorous mammal "shrew" | Long-term  | 0.64                   | 15.5              | 5       |
| BBCH ≥ 50                                                 | Small herbivorous mammal "vole"    | Long-term  | 7.36                   | <b>1.4</b>        | 5       |
| BBCH ≥ 50                                                 | Small omnivorous mammal "mouse"    | Long-term  | 0.78                   | 12.8              | 5       |
| <b>Higher tier (Mammals): -</b>                           |                                    |            |                        |                   |         |
| <b>Risk from bioaccumulation and food chain behaviour</b> |                                    |            |                        |                   |         |
| Indicator or focal species                                |                                    | Time scale | DDD (mg/kg bw per day) | TER               | Trigger |
| Earthworm-eating birds                                    |                                    | Long-term  | 0.575                  | 174               | 5       |
| Earthworm-eating mammals                                  |                                    | Long-term  | 0.701                  | 14.3              | 5       |
| Fish-eating birds                                         |                                    | Long-term  | 0.21                   | 484 <sup>a</sup>  | 5       |
| Fish-eating mammals                                       |                                    | Long-term  | 0.18                   | 54.2 <sup>a</sup> | 5       |
| Higher tier : not required                                |                                    |            |                        |                   |         |
| <b>Risk from consumption of contaminated water</b>        |                                    |            |                        |                   |         |
| Scenarios                                                 | Indicator or focal species         | Time scale | PEC <sub>dw</sub> xDWR | TER               | Trigger |
| Leaf scenario                                             | Birds                              | acute      | Not relevant           |                   | 5       |

| <b>Puddle scenario, Screening step</b>                                                             |         |           |            |                |    |
|----------------------------------------------------------------------------------------------------|---------|-----------|------------|----------------|----|
| 1) Application rate (g a.s./ha)/relevant endpoint <50 (koc<500 L/kg), TER calculation not needed   |         |           |            |                |    |
| 2) Application rate (g a.s./ha)/relevant endpoint <3000 (koc≥500 L/kg), TER calculation not needed |         |           |            |                |    |
| Puddle scenario                                                                                    | Birds   | acute     | Not needed | Case 2 (<0.36) | 10 |
| Puddle scenario                                                                                    | Mammals | acute     | Not needed | Case 2 (<0.16) | 10 |
| Puddle scenario                                                                                    | Birds   | Long-term | Not needed | Case 2 (8.0)   | 5  |
| Puddle scenario                                                                                    | Mammals | Long-term | Not needed | Case 2 (80)    | 5  |

<sup>a</sup> TER value calculated based on a BCF of 980, which was not normalized to 5% lipid content, as it was derived from a study where the lipid content was not measured.

### Toxicity data for all aquatic tested species (Regulation (EU) N° 283/2013, Annex Part A, points 8.2 and Regulation (EU) N° 284/2013 Annex Part A, point 10.2)\*

\* This section does not yet reflect the new EFSA Guidance Document on aquatic organisms which has been noted in the meeting of the Standing Committee on Plants, Animals, Food and Feed on 11 July 2014.

| Group                                         | Test substance | Time-scale (Test type)      | End point                                                                                                 | Toxicity <sup>1</sup>                                                                        |
|-----------------------------------------------|----------------|-----------------------------|-----------------------------------------------------------------------------------------------------------|----------------------------------------------------------------------------------------------|
| Laboratory tests                              |                |                             |                                                                                                           |                                                                                              |
| Fish                                          |                |                             |                                                                                                           |                                                                                              |
| Rainbow trout ( <i>Oncorhynchus mykiss</i> )  | Mepanipyrim    | Acute 96 h (static)         | Mortality, LC <sub>50</sub>                                                                               | > 0.74 mg a.s./L (mm)                                                                        |
| Rainbow trout ( <i>Oncorhynchus mykiss</i> )  | Frupica 50 WP  | Acute 96 h (static)         | Mortality, LC <sub>50</sub>                                                                               | > 0.67 mg a.s./L (mm)                                                                        |
| Rainbow trout ( <i>Oncorhynchus mykiss</i> )  | Mepanipyrim    | Chronic 28 d (flow-through) | Growth, NOEC                                                                                              | 0.029 mg a.s./L (mm)                                                                         |
| Rainbow trout ( <i>Oncorhynchus mykiss</i> )  | Mepanipyrim    | Chronic 91 d (flow-through) | Larval survival, NOEC<br>Growth, EC <sub>50</sub><br>Growth, EC <sub>20</sub><br>Growth, EC <sub>10</sub> | 0.051 mg a.s./L (mm)<br>0.130 mg a.s./L (mm)<br>0.046 mg a.s./L (mm)<br>0.027 mg a.s./L (mm) |
| Fathead minnow ( <i>Pimephales promelas</i> ) | Mepanipyrim    | Chronic 32 d (semi-static)  | Development, NOEC                                                                                         | 0.51 mg a.s./L (mm)                                                                          |
| Aquatic invertebrates                         |                |                             |                                                                                                           |                                                                                              |
| <i>Daphnia magna</i>                          | Mepanipyrim    | Acute 48 h (static)         | Mortality, EC <sub>50</sub>                                                                               | 0.63 mg a.s./L (mm)                                                                          |
| <i>Daphnia magna</i>                          | Frupica 50 WP  | Acute 48 h (static)         | Mortality, EC <sub>50</sub>                                                                               | 0.48 mg a.s./L (mm)                                                                          |

| Group                                                          | Test substance          | Time-scale<br>(Test type)              | End point                      | Toxicity <sup>1</sup>                                                           |
|----------------------------------------------------------------|-------------------------|----------------------------------------|--------------------------------|---------------------------------------------------------------------------------|
| <i>Daphnia magna</i>                                           | Mepanipyrim             | Chronic 21 d<br>(flow-through)         | Development, NOEC              | 0.031 mg a.s./L<br>(mm)                                                         |
|                                                                |                         |                                        | Development, EC <sub>50</sub>  | 0.277 mg a.s./L<br>(mm)                                                         |
|                                                                |                         |                                        | Development, EC <sub>20</sub>  | 0.206 mg a.s./L<br>(mm)                                                         |
|                                                                |                         |                                        | Development, EC <sub>10</sub>  | 0.176 mg a.s./L<br>(mm)                                                         |
| Sediment-dwelling organisms                                    |                         |                                        |                                |                                                                                 |
| Midge ( <i>Chironomus riparius</i> )                           | Mepanipyrim             | Chronic 28 d<br>(spiked water, static) | NOEC                           | 4.67 mg a.s./kg<br>dry sediment <sub>(im)</sub><br><br>(3.28 mg a.s./L<br>(im)) |
| Algae                                                          |                         |                                        |                                |                                                                                 |
| Green microalgae<br>( <i>Pseudokirchneriella subcapitata</i> ) | Mepanipyrim             | Chronic 72 h<br>(static)               | Growth rate:                   |                                                                                 |
|                                                                |                         |                                        | E <sub>r</sub> C <sub>50</sub> | 2.74 mg a.s./L<br>(mm)                                                          |
|                                                                |                         |                                        | E <sub>r</sub> C <sub>20</sub> | 1.53 mg a.s./L<br>(mm)                                                          |
|                                                                |                         |                                        | E <sub>r</sub> C <sub>10</sub> | 1.13 mg a.s./L<br>(mm)                                                          |
|                                                                |                         |                                        | NOEC <sub>r</sub>              | 0.363 mg a.s./L<br>(mm)                                                         |
|                                                                |                         |                                        | Yield:                         |                                                                                 |
|                                                                |                         |                                        | E <sub>y</sub> C <sub>50</sub> | 1.52 mg a.s./L<br>(mm)                                                          |
|                                                                |                         |                                        | E <sub>y</sub> C <sub>20</sub> | 1.04 mg a.s./L<br>(mm)                                                          |
| E <sub>y</sub> C <sub>10</sub>                                 | 0.86 mg a.s./L<br>(mm)  |                                        |                                |                                                                                 |
| NOEC <sub>y</sub>                                              | 0.363 mg a.s./L<br>(mm) |                                        |                                |                                                                                 |

| Group                                                                                                                                                                                                                                                                                                                                                                                                                                             | Test substance | Time-scale<br>(Test type) | End point                                                                                                                                                                                                                                                                                                | Toxicity <sup>1</sup>                                                                                                                                                                                          |
|---------------------------------------------------------------------------------------------------------------------------------------------------------------------------------------------------------------------------------------------------------------------------------------------------------------------------------------------------------------------------------------------------------------------------------------------------|----------------|---------------------------|----------------------------------------------------------------------------------------------------------------------------------------------------------------------------------------------------------------------------------------------------------------------------------------------------------|----------------------------------------------------------------------------------------------------------------------------------------------------------------------------------------------------------------|
| Green microalgae<br>( <i>Pseudokirchneriella subcapitata</i> )                                                                                                                                                                                                                                                                                                                                                                                    | Frupica 50 WP  | Chronic 72 h<br>(static)  | Growth rate:<br>E <sub>r</sub> C <sub>50</sub><br><br>E <sub>r</sub> C <sub>20</sub><br><br>E <sub>r</sub> C <sub>10</sub><br><br>NOEC <sub>r</sub><br><br>Yield:<br>E <sub>y</sub> C <sub>50</sub><br><br>E <sub>y</sub> C <sub>20</sub><br><br>E <sub>y</sub> C <sub>10</sub><br><br>NOEC <sub>y</sub> | 2.49 mg a.s./L<br>(mm)<br>0.89 mg a.s./L<br>(mm)<br>0.53 mg a.s./L<br>(mm)<br>0.041 mg a.s./L<br>(mm)<br>0.75 mg a.s./L<br>(mm)<br>0.21 mg a.s./L<br>(mm)<br>0.11 mg a.s./L<br>(mm)<br>0.041 mg a.s./L<br>(mm) |
| Further testing on aquatic organisms<br><i>Not needed</i>                                                                                                                                                                                                                                                                                                                                                                                         |                |                           |                                                                                                                                                                                                                                                                                                          |                                                                                                                                                                                                                |
| <p><b>Potential endocrine disrupting properties (Annex Part A, point 8.2.3)</b></p> <p>Based on the specific long-term <i>in vivo</i> studies reported in the DRAR there are no indications that mepanipyrin has endocrine-specific effects on fish. However, pending on the outcome of the data gap in Section 2, further ecotoxicological tests might be necessary to address the potential endocrine disrupting properties of mepanipyrin.</p> |                |                           |                                                                                                                                                                                                                                                                                                          |                                                                                                                                                                                                                |

<sup>1</sup> (nom) nominal concentration; (mm) mean measured concentration; (im) initial measured concentration prep.: preparation; a.s.: active substance

**Bioconcentration in fish (Annex Part A, point 8.2.2.3)**

|                                                                                                 | Mepanipyrim |
|-------------------------------------------------------------------------------------------------|-------------|
| logP <sub>O/W</sub>                                                                             | 3.28        |
| Steady-state bioconcentration factor (BCF)<br>(total wet weight/normalised to 5% lipid content) | 280*        |
| Uptake/depuration kinetics BCF<br>(total wet weight/normalised to 5% lipid content)             | -           |
| Annex VI Trigger for the bioconcentration factor                                                | -           |
| Clearance time (days) (CT <sub>50</sub> )                                                       | -           |
| (CT <sub>90</sub> )                                                                             | -           |
| Level and nature of residues (%) in organisms after the 14 day depuration phase                 | -           |
| Higher tier study                                                                               |             |
| <i>Not needed</i>                                                                               |             |

\* based on total <sup>14</sup>C. As the study from which this bioconcentration factor was derived was performed in accordance with a previous version of OECD Test Guideline 305, the lipid content of the fish tissue was not measured. It was therefore not possible to normalize the bioconcentration factor to 5% lipid content.

**Regulatory acceptable concentrations for the most sensitive aquatic organisms**

| <b>Mepanipyrim</b>               |                                     |                                    |                          |                  |
|----------------------------------|-------------------------------------|------------------------------------|--------------------------|------------------|
|                                  | <b>Most sensitive species group</b> | <b>Endpoint</b>                    | <b>Assessment factor</b> | <b>RAC</b>       |
| <b>Acute effect assessment</b>   | Aquatic invertebrates               | EC <sub>50</sub> = 0.48 mg a.s./L  | 100                      | 0.0048 mg a.s./L |
| <b>Chronic effect assessment</b> | <i>Chironomus riparius</i>          | NOEC = 4.67 mg a.s./kg             | 10                       | 0.467 mg a.s./kg |
|                                  | Fish                                | EC <sub>10</sub> = 0.027 mg a.s./L | 10                       | 0.0027 mg a.s./L |

### Comparison of the RAC for the most sensitive aquatic organisms with FOCUS PEC<sub>SW/SED</sub> values (Regulation (EU) N° 284/2013, Annex Part A, point 10.2)

#### FOCUS<sub>sw</sub> step 1-4 – Comparison of RACs and PEC<sub>SW</sub>/PEC<sub>SED</sub> for mepanipyrin – Grapevines at BBCH 77-89, 1 x 600 g a.s./ha (outdoor use)

| Step | Scenario        | RAC <sub>SW,CH</sub><br>(µg a.s./L) | Max PEC <sub>SW</sub><br>(µg a.s./L) | RAC <sub>SED,CH</sub><br>(µg a.s./kg) | Max PEC <sub>SED</sub><br>(µg a.s./kg) |
|------|-----------------|-------------------------------------|--------------------------------------|---------------------------------------|----------------------------------------|
| 1    | Europe          | 2.7                                 | <b>93.90</b>                         | 46.7                                  | <b>948.3</b>                           |
| 2    | Northern Europe |                                     | <b>22.29</b>                         |                                       | <b>232.4</b>                           |
|      | Southern Europe |                                     | <b>19.32</b>                         |                                       | <b>198.9</b>                           |
| 3    | D6 ditch        |                                     | <b>10.28</b>                         |                                       | 18.79                                  |
|      | R1 pond         |                                     | 0.367                                |                                       | 1.872                                  |
|      | R1 stream       |                                     | <b>7.538</b>                         |                                       | 1.171                                  |
|      | R2 stream       |                                     | <b>10.11</b>                         |                                       | 0.814                                  |
|      | R3 stream       |                                     | <b>10.63</b>                         |                                       | 5.617                                  |
|      | R4 stream       |                                     | <b>7.537</b>                         |                                       | 1.394                                  |
| 4    | D6 ditch        |                                     | 2.127                                |                                       | 1.851                                  |
|      | R1 pond         |                                     | 0.128                                |                                       | 0.711                                  |
|      | R1 stream       |                                     | 0.719                                |                                       | 0.118                                  |
|      | R2 stream       |                                     | 0.963                                |                                       | 0.081                                  |
|      | R3 stream       |                                     | 1.003                                |                                       | 0.862                                  |
|      | R4 stream       |                                     | 0.723                                |                                       | 0.307                                  |

Notes: Step 4 mitigation was 20 m no-spray buffer; values in bold exceed the relevant RAC, indicating an unacceptable risk

#### FOCUS<sub>sw</sub> step 1-4 – Comparison of RACs and PEC<sub>SW</sub>/PEC<sub>SED</sub> for mepanipyrin – Strawberries at BBCH 60-89, 2 x 400 g a.s./ha (interval 7 days) (outdoor use)

| Step      | Scenario        | RAC <sub>SW,CH</sub><br>(µg a.s./L) | Max PEC <sub>SW</sub><br>(µg a.s./L) | RAC <sub>SED,CH</sub><br>(µg a.s./kg) | Max PEC <sub>SED</sub><br>(µg a.s./kg) |
|-----------|-----------------|-------------------------------------|--------------------------------------|---------------------------------------|----------------------------------------|
| 1         | Europe          | 2.7                                 | <b>111.1</b>                         | 46.7                                  | <b>1220</b>                            |
| 2         | Northern Europe |                                     | <b>14.21</b>                         |                                       | <b>155.1</b>                           |
|           | Southern Europe |                                     | <b>25.26</b>                         |                                       | <b>285.1</b>                           |
| 3         | D3 ditch        |                                     | 2.527                                |                                       | 1.794                                  |
|           | D4 pond         |                                     | 0.121                                |                                       | 1.033                                  |
|           | D4 pond         |                                     | 1.791                                |                                       | 0.348                                  |
|           | D6 ditch        |                                     | <b>3.109</b>                         |                                       | 6.863                                  |
|           | R1 pond         |                                     | 0.524                                |                                       | 3.947                                  |
|           | R1 stream       |                                     | <b>3.196</b>                         |                                       | 8.961                                  |
|           | R2 stream       |                                     | 2.208                                |                                       | 17.44                                  |
|           | R3 stream       |                                     | <b>3.427</b>                         |                                       | 2.482                                  |
| 4         | R4 stream       |                                     | <b>6.186</b>                         |                                       | 10.36                                  |
|           | D3 ditch        |                                     | 0.188                                |                                       | 0.157                                  |
|           | D4 pond         |                                     | 0.098                                |                                       | 0.765                                  |
|           | D4 pond         |                                     | 0.357                                |                                       | 0.344                                  |
|           | D6 ditch        |                                     | 0.464                                |                                       | 0.622                                  |
|           | R1 pond         |                                     | 0.131                                |                                       | 0.953                                  |
|           | R1 stream       |                                     | 0.754                                |                                       | 0.766                                  |
|           | R2 stream       | 0.247                               | 1.019                                |                                       |                                        |
| R3 stream | 0.809           | 0.500                               |                                      |                                       |                                        |
| R4 stream | 1.460           | 1.963                               |                                      |                                       |                                        |

Notes: Step 4 mitigation was 20 m no-spray buffer and vegetated filter strip; values in bold exceed the relevant RAC, indicating an unacceptable risk

**FOCUS<sub>sw</sub> step 1-4 – Comparison of RACs and PEC<sub>sw</sub>/PEC<sub>sed</sub> for mepanipyrin – Tomatoes at BBCH 61-89, 2 x 400 g a.s./ha (interval 7 days) (outdoor use)**

| Step | Scenario        | RAC <sub>sw,CH</sub><br>(µg a.s./L) | Max PEC <sub>sw</sub><br>(µg a.s./L) | RAC <sub>sed,CH</sub><br>(µg a.s./kg) | Max PEC <sub>sed</sub> (µg<br>a.s./kg) |
|------|-----------------|-------------------------------------|--------------------------------------|---------------------------------------|----------------------------------------|
| 1    | Europe          | 2.7                                 | <b>111.1</b>                         | 46.7                                  | <b>1220</b>                            |
| 2    | Northern Europe |                                     | NA                                   |                                       | NA                                     |
|      | Southern Europe |                                     | <b>11.36</b>                         |                                       | <b>121.5</b>                           |
| 3    | D6 ditch        |                                     | 2.499                                |                                       | 0.820                                  |
|      | R2 stream       |                                     | 2.243                                |                                       | 36.38                                  |
|      | R3 stream       |                                     | <b>3.450</b>                         |                                       | 7.743                                  |
|      | R4 stream       |                                     | <b>5.336</b>                         |                                       | 5.154                                  |
| 4    | D6 ditch        |                                     | 0.520                                |                                       | 0.426                                  |
|      | R2 stream       |                                     | 0.232                                |                                       | 2.016                                  |
|      | R3 stream       |                                     | 0.824                                |                                       | 1.052                                  |
|      | R4 stream       |                                     | 1.271                                |                                       | 1.007                                  |

Notes: NA = not applicable; Step 4 mitigation was 20 m no-spray buffer and vegetated filter strip; values in bold exceed the relevant RAC, indicating an unacceptable risk

### Effects on bees (Regulation (EU) N° 283/2013, Annex Part A, point 8.3.1 and Regulation (EU) N° 284/2013 Annex Part A, point 10.3.1)\*

\* This section does reflect the new EFSA Guidance Document on bees which has not yet been noted by the Standing Committee on Plants, Animals, Food and Feed.

| Species                                   | Test substance | Time scale/type of endpoint   | End point                            | toxicity                              |
|-------------------------------------------|----------------|-------------------------------|--------------------------------------|---------------------------------------|
| Honeybee<br>( <i>Apis mellifera</i> )     | Mepanipyrim    | Acute, adult toxicity         | Oral toxicity (LD <sub>50</sub> )    | > 50 µg a.s./bee                      |
| Honeybee<br>( <i>Apis mellifera</i> )     | Mepanipyrim    | Acute, adult toxicity         | Contact toxicity (LD <sub>50</sub> ) | > 100 µg a.s./bee                     |
| Honeybee<br>( <i>Apis mellifera</i> )     | Frupica 50 WP  | Acute, adult toxicity         | Oral toxicity (LD <sub>50</sub> )    | > 100 µg a.s./bee                     |
| Honeybee<br>( <i>Apis mellifera</i> )     | Frupica 50 WP  | Acute, adult toxicity         | Contact toxicity (LD <sub>50</sub> ) | > 80 µg a.s./bee                      |
| Honeybee<br>( <i>Apis mellifera</i> )     | Mepanipyrim    | Chronic (10d), adult toxicity | LDD50                                | > 60.2 µg a.s./bee/day                |
| Honeybee<br>( <i>Apis mellifera</i> )     | Mepanipyrim    | Chronic (7d), larval toxicity | NOEL                                 | 155 µg/larva/<br>developmental period |
| Bumblebee<br>( <i>Bombus terrestris</i> ) | Mepanipyrim    | Acute, adult toxicity         | Oral toxicity (LD <sub>50</sub> )    | > 100 µg a.s./bee                     |
| Bumblebee<br>( <i>Bombus terrestris</i> ) | Mepanipyrim    | Acute, adult toxicity         | Contact toxicity (LD <sub>50</sub> ) | > 100 µg a.s./bee                     |

|                                                          |
|----------------------------------------------------------|
| Potential for accumulative toxicity: <i>not assessed</i> |
| Semi-field test (Cage and tunnel test)<br><i>None</i>    |
| Field tests<br><i>None</i>                               |

### Risk assessment for bees according to SANCO/10329/2002 (acute risk) for Grapevines at BBCH 77-89, 1 x 600 g a.s./ha

(covers the acute risk to bees following the use (both indoor and outdoor) in Strawberries at BBCH 60-89, 2 x 400 g a.s./ha and the use in Tomatoes at BBCH 61-89, 2 x 400 g a.s./ha)

| Species                            | Test substance | Risk quotient         | HQ/TER | Trigger |
|------------------------------------|----------------|-----------------------|--------|---------|
| Honeybee ( <i>Apis mellifera</i> ) | Mepanipyrim    | HQ <sub>oral</sub>    | < 12   | ≥ 50    |
| Honeybee ( <i>Apis mellifera</i> ) | Mepanipyrim    | HQ <sub>contact</sub> | < 6    | ≥ 50    |
| Honeybee ( <i>Apis mellifera</i> ) | Frupica 50 WP  | HQ <sub>oral</sub>    | < 6    | ≥ 50    |
| Honeybee ( <i>Apis mellifera</i> ) | Frupica 50 WP  | HQ <sub>contact</sub> | < 7.5  | ≥ 50    |

### Risk assessment for bees according to EFSA (2013)



for Grapevines at BBCH 77-89, 1 x 600 g a.s./ha, Strawberries (indoor and outdoor) at BBCH 60-89, 2 x 400 g a.s./ha (interval 7 days), and Tomatoes (indoor and outdoor) at BBCH 61-89, 2 x 400 g a.s./ha (interval 7 days)

#### Acute contact exposure of adult honeybees – screening step

| Test substance | Crop                             | Application rate (g a.s./ha) | LD <sub>50</sub> (µg a.s./bee) | HQ    | Trigger value |
|----------------|----------------------------------|------------------------------|--------------------------------|-------|---------------|
| Mepanipyrim    | Vineyard                         | 600                          | > 100                          | < 6.0 | 85            |
|                | Strawberries <sup>1</sup>        | 400                          | > 100                          | < 4.0 | 42            |
|                | Fruiting Vegetables <sup>1</sup> | 400                          | > 100                          | < 4.0 | 42            |
| Frupica 50 WP  | Vineyard                         | 600                          | >80                            | < 7.5 | 85            |
|                | Strawberries <sup>1</sup>        | 400                          | > 80                           | < 5.0 | 42            |
|                | Fruiting Vegetables <sup>1</sup> | 400                          | > 80                           | < 5.0 | 42            |

<sup>1</sup>Both indoor and outdoor use

#### Acute and chronic oral exposure of adult honeybees and honeybee larvae – screening step

| Type of assessment               | Test substance | Crop                             | Application rate (kg a.s./ha) | SV   | Endpoint                                    | ETR            | Trigger value |
|----------------------------------|----------------|----------------------------------|-------------------------------|------|---------------------------------------------|----------------|---------------|
| Acute oral exposure adult bees   | Mepanipyrim    | Vineyard <sup>1</sup>            | 0.6                           | 10.6 | > 50 µg a.s./bee                            | < 0.12         | 0.2           |
|                                  |                | Strawberries <sup>2</sup>        | 0.4                           | 7.6  |                                             | < 0.06         | 0.2           |
|                                  |                | Strawberries <sup>3</sup>        | 0.4                           | 10.6 |                                             | < 0.08         | 0.2           |
|                                  |                | Fruiting Vegetables <sup>2</sup> | 0.4                           | 7.6  |                                             | < 0.06         | 0.2           |
|                                  |                | Fruiting Vegetables <sup>3</sup> | 0.4                           | 10.6 |                                             | < 0.08         | 0.2           |
|                                  | Frupica 50 WP  | Vineyard <sup>1</sup>            | 0.6                           | 10.6 | > 100 µg a.s./bee                           | < 0.06         | 0.2           |
|                                  |                | Strawberries <sup>2</sup>        | 0.4                           | 7.6  |                                             | < 0.03         | 0.2           |
|                                  |                | Strawberries <sup>3</sup>        | 0.4                           | 10.6 |                                             | < 0.04         | 0.2           |
|                                  |                | Fruiting Vegetables <sup>2</sup> | 0.4                           | 7.6  |                                             | < 0.03         | 0.2           |
|                                  |                | Fruiting Vegetables <sup>3</sup> | 0.4                           | 10.6 |                                             | < 0.04         | 0.2           |
| Chronic oral exposure adult bees | Mepanipyrim    | Vineyard <sup>1</sup>            | 0.6                           | 10.6 | > 60.2 µg a.s./bee/day                      | < <b>0.106</b> | 0.03          |
|                                  |                | Strawberries <sup>2</sup>        | 0.4                           | 7.6  |                                             | < <b>0.050</b> | 0.03          |
|                                  |                | Strawberries <sup>3</sup>        | 0.4                           | 10.6 |                                             | < <b>0.070</b> | 0.03          |
|                                  |                | Fruiting Vegetables <sup>2</sup> | 0.4                           | 7.6  |                                             | < <b>0.050</b> | 0.03          |
|                                  |                | Fruiting Vegetables <sup>3</sup> | 0.4                           | 10.6 |                                             | < <b>0.070</b> | 0.03          |
| Chronic oral exposure larvae     | Mepanipyrim    | Vineyard <sup>1</sup>            | 0.6                           | 6.1  | 155 µg a.s./larvae per developmental period | 0.024          | 0.2           |
|                                  |                | Strawberries <sup>2</sup>        | 0.4                           | 4.4  |                                             | 0.011          | 0.2           |
|                                  |                | Strawberries <sup>3</sup>        | 0.4                           | 6.1  |                                             | 0.016          | 0.2           |
|                                  |                | Fruiting Vegetables <sup>2</sup> | 0.4                           | 4.4  |                                             | 0.011          | 0.2           |
|                                  |                | Fruiting Vegetables <sup>3</sup> | 0.4                           | 6.1  |                                             | 0.016          | 0.2           |

<sup>1</sup>Sideward spray application; <sup>2</sup>Outdoor use – Downward spray application; <sup>3</sup>Indoor use – Sideward spray application

#### Chronic oral exposure of adult honeybees – Tier 1

| Crop                  | Scenario     | BBCH | Appl. rate (kg a.s./ha) | Ef    | SV  | twa  | Endpoint (µg a.s./bee/day) | ETR     | Trigger value |
|-----------------------|--------------|------|-------------------------|-------|-----|------|----------------------------|---------|---------------|
| Vineyard <sup>1</sup> | Treated crop | ≥ 70 | 0.6                     | 1     | 0   | 0.72 | >60.2                      | 0.000   | 0.03          |
|                       | Weeds        | ≥ 70 |                         | 0.3   | 2.9 | 0.72 |                            | < 0.006 |               |
|                       | Field        | ≥ 70 |                         | 0.027 | 2.9 | 0.72 |                            | < 0.001 |               |

|                                           |                                          |              |        |        |      |      |         |          |        |         |        |         |      |
|-------------------------------------------|------------------------------------------|--------------|--------|--------|------|------|---------|----------|--------|---------|--------|---------|------|
|                                           | margin                                   |              |        |        |      |      |         |          |        |         |        |         |      |
|                                           | Adjacent crop                            | ≥ 70         |        | 0.0143 | 5.8  | 0.72 |         | < 0.001  |        |         |        |         |      |
|                                           | Succeeding crop                          | ≥ 70         |        | 1      | 0.54 | 0.72 |         | < 0.004  |        |         |        |         |      |
| Strawberries, outdoor <sup>2</sup>        | Treated crop                             | 40-69        | 0.4    | 1      | 5.8  | 0.72 | > 60.2  | < 0.039* | 0.03   |         |        |         |      |
|                                           |                                          | ≥ 70         |        | 1      | 0    | 0.72 |         | 0.000    |        |         |        |         |      |
|                                           | Weeds                                    | 40-69        |        | 0.4    | 2.9  | 0.72 |         | < 0.006  |        |         |        |         |      |
|                                           |                                          | ≥ 70         |        | 0.4    | 2.9  | 0.72 |         | < 0.006  |        |         |        |         |      |
|                                           | Field margin                             | 40-69        |        | 0.0092 | 2.9  | 0.72 |         | 0.000    |        |         |        |         |      |
|                                           |                                          | ≥ 70         |        | 0.0092 | 2.9  | 0.72 |         | 0.000    |        |         |        |         |      |
|                                           | Adjacent crop                            | 40-69        |        | 0.0033 | 5.8  | 0.72 |         | 0.000    |        |         |        |         |      |
|                                           |                                          | ≥ 70         |        | 0.0033 | 5.8  | 0.72 |         | 0.000    |        |         |        |         |      |
|                                           | Succeeding crop                          | 40-69        |        | 1      | 0.54 | 0.72 |         | < 0.003  |        |         |        |         |      |
|                                           |                                          | ≥ 70         |        | 1      | 0.54 | 0.72 |         | < 0.003  |        |         |        |         |      |
|                                           | Strawberries, indoor <sup>1</sup>        | Treated crop |        | 40-69  | 0.4  | 1    |         | 8.2      |        | 0.72    | > 60.2 | < 0.039 | 0.03 |
|                                           |                                          |              |        | ≥ 70   |      | 1    |         | 0        |        | 0.72    |        | 0.000   |      |
| Weeds                                     |                                          | 40-69        | 0.4    | 2.9    |      | 0.72 | < 0.006 |          |        |         |        |         |      |
|                                           |                                          | ≥ 70         | 0.4    | 2.9    |      | 0.72 | < 0.006 |          |        |         |        |         |      |
| Field margin                              |                                          | 40-69        | 0.0092 | 2.9    |      | 0.72 | 0.000   |          |        |         |        |         |      |
|                                           |                                          | ≥ 70         | 0.0092 | 2.9    |      | 0.72 | 0.000   |          |        |         |        |         |      |
| Adjacent crop                             |                                          | 40-69        | 0.0033 | 5.8    |      | 0.72 | 0.000   |          |        |         |        |         |      |
|                                           |                                          | ≥ 70         | 0.0033 | 5.8    |      | 0.72 | 0.000   |          |        |         |        |         |      |
| Succeeding crop                           |                                          | 40-69        | 1      | 0.54   |      | 0.72 | < 0.003 |          |        |         |        |         |      |
|                                           |                                          | ≥ 70         | 1      | 0.54   |      | 0.72 | < 0.003 |          |        |         |        |         |      |
| Fruiting vegetables, outdoor <sup>2</sup> |                                          | Treated crop | 50-69  | 0.4    |      | 1    | 0.92    | 0.72     | > 60.2 | < 0.004 |        | 0.03    |      |
|                                           |                                          |              | ≥ 70   |        |      | 1    | 0       | 0.72     |        | 0.000   |        |         |      |
|                                           | Weeds                                    | 50-69        | 0.3    |        | 2.9  | 0.72 | < 0.004 |          |        |         |        |         |      |
|                                           |                                          | ≥ 70         | 0.3    |        | 2.9  | 0.72 | < 0.004 |          |        |         |        |         |      |
|                                           | Field margin                             | 50-69        | 0.0092 |        | 2.9  | 0.72 | 0.000   |          |        |         |        |         |      |
|                                           |                                          | ≥ 70         | 0.0092 |        | 2.9  | 0.72 | 0.000   |          |        |         |        |         |      |
|                                           | Adjacent crop                            | 50-69        | 0.0033 |        | 5.8  | 0.72 | 0.000   |          |        |         |        |         |      |
|                                           |                                          | ≥ 70         | 0.0033 |        | 5.8  | 0.72 | 0.000   |          |        |         |        |         |      |
|                                           | Succeeding crop                          | 50-69        | 1      |        | 0.54 | 0.72 | < 0.003 |          |        |         |        |         |      |
|                                           |                                          | ≥ 70         | 1      |        | 0.54 | 0.72 | < 0.003 |          |        |         |        |         |      |
|                                           | Fruiting vegetables, indoor <sup>1</sup> | Treated crop | 50-69  |        | 0.4  | 1    | 0.06    | 0.72     |        | > 60.2  | 0.000  |         | 0.03 |
|                                           |                                          |              | ≥ 70   |        |      | 1    | 0       | 0.72     |        |         | 0.000  |         |      |
| Weeds                                     |                                          | 50-69        | 0.3    | 2.9    |      | 0.72 | < 0.004 |          |        |         |        |         |      |
|                                           |                                          | ≥ 70         | 0.3    | 2.9    |      | 0.72 | < 0.004 |          |        |         |        |         |      |
| Field margin                              |                                          | 50-69        | 0.0092 | 2.9    |      | 0.72 | 0.000   |          |        |         |        |         |      |
|                                           |                                          | ≥ 70         | 0.0092 | 2.9    |      | 0.72 | 0.000   |          |        |         |        |         |      |
| Adjacent crop                             |                                          | 50-69        | 0.0033 | 5.8    |      | 0.72 | 0.000   |          |        |         |        |         |      |
|                                           |                                          | ≥ 70         | 0.0033 | 5.8    |      | 0.72 | 0.000   |          |        |         |        |         |      |
| Succeeding crop                           |                                          | 50-69        | 1      | 0.54   |      | 0.72 | < 0.003 |          |        |         |        |         |      |
|                                           |                                          | ≥ 70         | 1      | 0.54   |      | 0.72 | < 0.003 |          |        |         |        |         |      |

<sup>1</sup>Sideward spray application; <sup>2</sup>Downward spray application

\* Despite the trigger was slightly breached, EFSA concluded a low risk based on the fact that the ETR was calculated with an unbounded LDD<sub>50</sub> and that only 4% effect was seen at the highest tested dose. More details about the rationale for this decision are included in the evaluation table.

### Risk assessment for contaminated water

| Risk assessment for guttation water |                       |                        |             |          |        |         |
|-------------------------------------|-----------------------|------------------------|-------------|----------|--------|---------|
| Type of assessment                  | Crop                  | Water consumption (μL) | PEC (μg/μL) | Endpoint | ETR    | Trigger |
| Acute oral                          | Vineyard <sup>1</sup> | 11.4                   | 0.0031      | > 50 μg  | 0.0007 | 0.2     |

|                                                |                                  |                        |             |                                             |                        |         |
|------------------------------------------------|----------------------------------|------------------------|-------------|---------------------------------------------|------------------------|---------|
| exposure adult bees                            | Strawberries <sup>2</sup>        | 11.4                   | 0.0031      | a.s./bee                                    | 0.0007                 | 0.2     |
|                                                | Fruiting Vegetables <sup>2</sup> | 11.4                   | 0.0031      |                                             | 0.0007                 | 0.2     |
| Chronic oral exposure adult bees               | Vineyard <sup>1</sup>            | 11.4                   | 0.00167     | > 60.2 µg a.s./bee/day                      | 0.0003                 | 0.03    |
|                                                | Strawberries <sup>2</sup>        | 11.4                   | 0.00167     |                                             | 0.0003                 | 0.03    |
|                                                | Fruiting Vegetables <sup>2</sup> | 11.4                   | 0.00167     |                                             | 0.0003                 | 0.03    |
| Chronic oral exposure larvae                   | Vineyard <sup>1</sup>            | 111                    | 0.00223     | 155 µg a.s./larvae per developmental period | 0.0016                 | 0.2     |
|                                                | Strawberries <sup>2</sup>        | 111                    | 0.00223     |                                             | 0.0016                 | 0.2     |
|                                                | Fruiting Vegetables <sup>2</sup> | 111                    | 0.00223     |                                             | 0.0016                 | 0.2     |
| Risk assessment for contaminated surface water |                                  |                        |             |                                             |                        |         |
| Type of assessment                             | Crop                             | Water consumption (µL) | PEC (µg/µL) | Endpoint                                    | ETR                    | Trigger |
| Acute oral exposure adult bees                 | Vineyard <sup>1</sup>            | 11.4                   | 0.000094    | > 50 µg a.s./bee                            | 2.1 x 10 <sup>-5</sup> | 0.2     |
|                                                | Strawberries <sup>2</sup>        | 11.4                   | 0.00011     |                                             | 2.5 x 10 <sup>-5</sup> | 0.2     |
|                                                | Fruiting Vegetables <sup>2</sup> | 11.4                   | 0.00011     |                                             | 2.5 x 10 <sup>-5</sup> | 0.2     |
| Chronic oral exposure adult bees               | Vineyard <sup>1</sup>            | 11.4                   | 0.000094    | > 60.2 µg a.s./bee/day                      | 1.8 x 10 <sup>-5</sup> | 0.03    |
|                                                | Strawberries <sup>2</sup>        | 11.4                   | 0.00011     |                                             | 2.1 x 10 <sup>-5</sup> | 0.03    |
|                                                | Fruiting Vegetables <sup>2</sup> | 11.4                   | 0.00011     |                                             | 2.1 x 10 <sup>-5</sup> | 0.03    |
| Chronic oral exposure larvae                   | Vineyard <sup>1</sup>            | 111                    | 0.000094    | 155 µg a.s./larvae per developmental period | 6.7 x 10 <sup>-5</sup> | 0.2     |
|                                                | Strawberries <sup>2</sup>        | 111                    | 0.00011     |                                             | 8.0 x 10 <sup>-5</sup> | 0.2     |
|                                                | Fruiting Vegetables <sup>2</sup> | 111                    | 0.00011     |                                             | 8.0 x 10 <sup>-5</sup> | 0.2     |

<sup>1</sup>Sideward spray application; <sup>2</sup>Downward spray application

#### Acute contact exposure of adult bumblebees – screening step

| Test substance | Crop                             | Application rate (g a.s./ha) | LD <sub>50</sub> (µg a.s./bee) | HQ    | Trigger value |
|----------------|----------------------------------|------------------------------|--------------------------------|-------|---------------|
| Mepanipyrim    | Vineyard                         | 600                          | > 100                          | < 6.0 | 14            |
|                | Strawberries <sup>1</sup>        | 400                          | > 100                          | < 4.0 | 7             |
|                | Fruiting Vegetables <sup>1</sup> | 400                          | > 100                          | < 4.0 | 7             |

<sup>1</sup>For both outdoor and indoor application

#### Acute oral exposure of adult bumblebees – screening step

| Type of assessment             | Test substance | Crop                             | Application rate (kg a.s./ha) | SV   | Endpoint          | ETR            | Trigger value |
|--------------------------------|----------------|----------------------------------|-------------------------------|------|-------------------|----------------|---------------|
| Acute oral exposure adult bees | Mepanipyrim    | Vineyard <sup>1</sup>            | 0.6                           | 13.3 | > 100 µg a.s./bee | < <b>0.080</b> | 0.036         |
|                                |                | Strawberries <sup>2</sup>        | 0.4                           | 11.2 |                   | < <b>0.045</b> | 0.036         |
|                                |                | Strawberries <sup>3</sup>        | 0.4                           | 13.3 |                   | < <b>0.053</b> | 0.036         |
|                                |                | Fruiting Vegetables <sup>2</sup> | 0.4                           | 11.2 |                   | < <b>0.045</b> | 0.036         |
|                                |                | Fruiting Vegetables <sup>3</sup> | 0.4                           | 13.3 |                   | < <b>0.053</b> | 0.036         |

<sup>1</sup>Sideward spray application; <sup>2</sup>Outdoor use - Downward spray application; <sup>3</sup>Indoor use – Sideward spray application

#### Acute oral exposure of adult bumblebees – Tier 1

| Crop                  | Scenario     | BBCH | Appl. rate (kg a.s./ha) | Ef    | SV  | Endpoint (µg a.s./bee) | ETR      | Trigger value |
|-----------------------|--------------|------|-------------------------|-------|-----|------------------------|----------|---------------|
| Vineyard <sup>1</sup> | Treated crop | ≥ 70 | 0.6                     | 1     | 0   | > 100                  | 0.000    | 0.036         |
|                       | Weeds        | ≥ 70 |                         | 0.3   | 6.5 |                        | < 0.0117 |               |
|                       | Field        | ≥ 70 |                         | 0.027 | 6.5 |                        | < 0.0011 |               |

|                                          |                 |       |     |          |      |       |                  |       |
|------------------------------------------|-----------------|-------|-----|----------|------|-------|------------------|-------|
|                                          | margin          |       |     |          |      |       |                  |       |
|                                          | Adjacent crop   | ≥ 70  |     | 0.0143   | 11.2 |       | < 0.0010         |       |
|                                          | Succeeding crop | ≥ 70  |     | 1        | 0.9  |       | < 0.0054         |       |
| Strawberries outdoor <sup>2</sup>        | Treated crop    | 40-69 | 0.4 | 1        | 11.2 | > 100 | < <b>0.0448*</b> | 0.036 |
|                                          |                 | ≥ 70  |     | 1        | 0    |       | 0.0000           |       |
|                                          | Weeds           | 40-69 |     | 0.4      | 6.5  |       | < 0.0104         |       |
|                                          |                 | ≥ 70  |     | 0.4      | 6.5  |       | < 0.0104         |       |
|                                          | Field margin    | 40-69 |     | 0.0092   | 6.5  |       | < 0.0002         |       |
|                                          |                 | ≥ 70  |     | 0.0092   | 6.5  |       | < 0.0002         |       |
|                                          | Adjacent crop   | 40-69 |     | 0.0033   | 11.2 |       | < 0.0001         |       |
|                                          |                 | ≥ 70  |     | 0.0033   | 11.2 |       | < 0.0001         |       |
| Succeeding crop                          | 40-69           | 1     | 0.9 | < 0.0036 |      |       |                  |       |
|                                          | ≥ 70            | 1     | 0.9 | < 0.0036 |      |       |                  |       |
| Strawberries indoor <sup>1</sup>         | Treated crop    | 40-69 | 0.4 | 1        | 13.3 | > 100 | < <b>0.0532*</b> | 0.036 |
|                                          |                 | ≥ 70  |     | 1        | 0    |       | 0.0000           |       |
|                                          | Weeds           | 40-69 |     | 0.4      | 6.5  |       | < 0.0104         |       |
|                                          |                 | ≥ 70  |     | 0.4      | 6.5  |       | < 0.0104         |       |
|                                          | Field margin    | 40-69 |     | 0.0092   | 6.5  |       | < 0.0002         |       |
|                                          |                 | ≥ 70  |     | 0.0092   | 6.5  |       | < 0.0002         |       |
|                                          | Adjacent crop   | 40-69 |     | 0.0033   | 11.2 |       | < 0.0001         |       |
|                                          |                 | ≥ 70  |     | 0.0033   | 11.2 |       | < 0.0001         |       |
| Succeeding crop                          | 40-69           | 1     | 0.9 | < 0.0036 |      |       |                  |       |
|                                          | ≥ 70            | 1     | 0.9 | < 0.0036 |      |       |                  |       |
| Fruiting vegetables outdoor <sup>2</sup> | Treated crop    | 50-69 | 0.4 | 1        | 2.3  | > 100 | < 0.0092         | 0.036 |
|                                          |                 | ≥ 70  |     | 1        | 0    |       | 0.0000           |       |
|                                          | Weeds           | 50-69 |     | 0.3      | 6.5  |       | < 0.0078         |       |
|                                          |                 | ≥ 70  |     | 0.3      | 6.5  |       | < 0.0078         |       |
|                                          | Field margin    | 50-69 |     | 0.0092   | 6.5  |       | < 0.0002         |       |
|                                          |                 | ≥ 70  |     | 0.0092   | 6.5  |       | < 0.0002         |       |
|                                          | Adjacent crop   | 50-69 |     | 0.0033   | 11.2 |       | < 0.0001         |       |
|                                          |                 | ≥ 70  |     | 0.0033   | 11.2 |       | < 0.0001         |       |
| Succeeding crop                          | 50-69           | 1     | 0.9 | < 0.0036 |      |       |                  |       |
|                                          | ≥ 70            | 1     | 0.9 | < 0.0036 |      |       |                  |       |
| Fruiting vegetables indoor <sup>2</sup>  | Treated crop    | 50-69 | 0.4 | 1        | 0.15 | > 100 | < 0.0006         | 0.036 |
|                                          |                 | ≥ 70  |     | 1        | 0    |       | 0.0000           |       |
|                                          | Weeds           | 50-69 |     | 0.3      | 6.5  |       | < 0.0078         |       |
|                                          |                 | ≥ 70  |     | 0.3      | 6.5  |       | < 0.0078         |       |
|                                          | Field margin    | 50-69 |     | 0.0092   | 6.5  |       | < 0.0002         |       |
|                                          |                 | ≥ 70  |     | 0.0092   | 6.5  |       | < 0.0002         |       |
|                                          | Adjacent crop   | 50-69 |     | 0.0033   | 11.2 |       | < 0.0001         |       |
|                                          |                 | ≥ 70  |     | 0.0033   | 11.2 |       | < 0.0001         |       |
| Succeeding crop                          | 50-69           | 1     | 0.9 | < 0.0036 |      |       |                  |       |
|                                          | ≥ 70            | 1     | 0.9 | < 0.0036 |      |       |                  |       |

<sup>1</sup> Sideward spray application; <sup>2</sup> Downward spray application

\* Despite the trigger was slightly breached, EFSA concluded a low risk based on the fact that the ETR was calculated with an unbounded LD<sub>50</sub> and that 0% effect was seen at the highest tested dose. More details about the rationale for this decision are included in the evaluation table.

**Effects on other arthropod species (Regulation (EU) N° 283/2013, Annex Part A, point 8.3.2 and Regulation (EU) N° 284/2013 Annex Part A, point 10.3.2)**
**Laboratory tests with standard sensitive species**

| Species                          | Test Substance | End point                      | Toxicity                                                                       |
|----------------------------------|----------------|--------------------------------|--------------------------------------------------------------------------------|
| <i>Typhlodromus pyri</i>         | Frupica 50 WP  | Mortality, LR <sub>50</sub>    | > 1000 g a.s./ha                                                               |
|                                  |                | Reproduction, ER <sub>50</sub> | > 1000 g a.s./ha                                                               |
| <i>Aphidius rhopalosiphi</i>     | Frupica 50 WP  | Mortality, LR <sub>50</sub>    | > 1000 g a.s./ha                                                               |
|                                  |                | Reproduction, ER <sub>50</sub> | 250 g a.s./ha                                                                  |
| Additional species               |                |                                |                                                                                |
| <i>Poecilus cupreus</i>          | Frupica 50 WP  | Mortality, LR <sub>50</sub>    | > 1400 g a.s./ha                                                               |
|                                  |                | Reproduction, ER <sub>50</sub> | > 1400 g a.s./ha                                                               |
| <i>Chrysoperla carnea</i>        | Frupica 50 WP  | Mortality, LR <sub>50</sub>    | > 500 g a.s./ha                                                                |
|                                  |                | Reproduction                   | 35.9% reduction in reproductive success at 500 g a.s./ha                       |
| <i>Coccinella septempunctata</i> | Frupica 50 WP  | Mortality                      | 47.7% higher larval mortality compared to control at 500 g a.s./ha             |
|                                  |                | Reproduction                   | 54.99 % reduction in reproduction success compared to control at 500 g a.s./ha |
| <i>Trichogramma cacoeciae</i>    | Frupica 50 WP  | Reproduction                   | 96% reduction in parasitation capacity compared to control at 500 g a.s./ha    |

**First tier risk assessment for Grapevines at BBCH 77-89, 1 x 600 g a.s./ha / Strawberries (indoor and outdoor) at BBCH 60-89, 2 x 400 g a.s./ha (7 day interval) / Tomatoes (indoor and outdoor) at BBCH 61-89, 2 x 400 g a.s./ha (7 day interval)**

(the highest in-field and off-field PER values were used to calculate the HQ values to cover all the proposed uses)

| Test substance | Species                      | Effect (LR <sub>50</sub> g/ha) | HQ in-field | HQ off-field <sup>1</sup> | Trigger |
|----------------|------------------------------|--------------------------------|-------------|---------------------------|---------|
| Frupica 50 WP  | <i>Typhlodromus pyri</i>     | > 1000                         | < 0.68      | < 0.048                   | 2       |
| Frupica 50 WP  | <i>Aphidius rhopalosiphi</i> | > 1000                         | < 0.68      | < 0.048                   | 2       |
| Frupica 50 WP  | <i>Poecilus cupreus</i>      | > 1400                         | < 0.49      | < 0.034                   | 2       |
| Frupica 50 WP  | <i>Chrysoperla carnea</i>    | > 500                          | < 1.36      | < 0.096                   | 2       |

<sup>1</sup>a distance of 3 m was assumed to calculate the drift rate for the use in grapevines, and a distance of 1 m was assumed for the use in strawberries and tomatoes

**Extended laboratory tests, aged residue tests**

| Species                          | Life stage        | Test substance, substrate  | Time scale          | Dose (g/ha)                                                                   | End point               | % effect <sup>1</sup>                                                                                                                                                                                             | ER <sub>50</sub> |
|----------------------------------|-------------------|----------------------------|---------------------|-------------------------------------------------------------------------------|-------------------------|-------------------------------------------------------------------------------------------------------------------------------------------------------------------------------------------------------------------|------------------|
| <i>Aphidius rhopalosiphi</i>     | Adult             | Frupica 50 WP, Vine leaves | 48h of exposure     | 606 g a.s./ha and 2 x 404 g a.s./ha; fresh and 7d aged residues               | Mortality, reproduction | At 606 and 2 x 404 g a.s./ha: <25% mortality on fresh residues and < 10% on 7d aged residues; reduction in parasitation capacity < 35% both on fresh and 7d aged residues                                         | -                |
| <i>Chrysoperla carnea</i>        | Larvae and adults | Frupica 50 WP, Vine leaves | 3 weeks of exposure | 45 g a.s./ha, 600 g a.s./ha and 2 x 400 g a.s./ha; fresh and 7d aged residues | Mortality, reproduction | At 45, 600 and 2 x 400 g a.s./ha (0 and 7 d residues on vine leaves): mortality <15% in all treatments; >16.2 eggs/female/day with hatching success >83.8% in all treatments (<15% reduction compared to control) | -                |
| <i>Coccinella septempunctata</i> | Larvae and adults | Frupica 50 WP, Vine leaves | 3 weeks of exposure | 45 g a.s./ha, 600 g a.s./ha and 2 x 400 g a.s./ha; fresh and 7d aged residues | Mortality, reproduction | At 45, 600 and 2 x 400 g a.s./ha (0 and 8 d residues on vine leaves): mortality ≤30% in all treatments; >5 eggs/female/day with hatching success >69.5% in all treatments (<35% reduction compared to control)    | -                |

<sup>1</sup> Positive percentages relate to adverse effects

**Semi-field tests**

A semi-field test was performed with *Aphidius rhopalosiphi* adults, on treated strawberry plants. The adult wasps were exposed for 96h to either fresh or 14 day aged residues of mepanipyrim following treatment with Frupica 50 WP. The plants were treated with either 45 g a.s./ha, 600 g a.s./ha or 2 x 400 g a.s./ha.

Results: At 45, 600 and 2 x 400 g a.s./ha (0 and 14d residues on strawberries): <30% reduction in parasitation capacity (no reduction on 14d aged residues); no behavioural effects

**Field studies**

A field test was performed with *Typhlodromus pyri* (mobile stages), on treated vine plants. The mites were exposed for 57 days to residues of mepanipyrim following a treatment with Frupica 50 WP at 600 g a.s./ha.

Results: the number of mites per leaf 7 days after treatment reduced to 57% of control levels, to 77% after 21 days and to 88% after 57 days.

**Additional specific test**

None

**Risk assessment** for – Grapevines at BBCH 77-89, 1 x 600 g a.s./ha / Strawberries at BBCH 60-89, 2 x 400 g a.s./ha (7 day interval) (both indoor and outdoor) / Tomatoes at BBCH 61-89, 2 x 400 g a.s./ha (7 day interval) (both indoor and outdoor), based on extended lab tests, aged residue tests, semi-field and field tests.

As the effects observed in the extended lab tests, aged residue tests, semi-field and field tests were below the 50% threshold of ESCORT II at application rates covering the intended application rates in grapevines, strawberry and tomato, the risk to non-target arthropods can be considered acceptable.

**Effects on non-target soil meso- and macro fauna; effects on soil nitrogen transformation (Regulation (EU) N° 283/2013, Annex Part A, points 8.4, 8.5, and Regulation (EU) N° 284/2013 Annex Part A, points 10.4, 10.5)**

| Test organism                       | Test substance | Application method of test a.s./ OM <sup>1</sup> | Time scale | End point                                                       | Toxicity                                                                                                                                                                                                                                                                                                                                                                                                                                                                                                     |
|-------------------------------------|----------------|--------------------------------------------------|------------|-----------------------------------------------------------------|--------------------------------------------------------------------------------------------------------------------------------------------------------------------------------------------------------------------------------------------------------------------------------------------------------------------------------------------------------------------------------------------------------------------------------------------------------------------------------------------------------------|
| Earthworms                          |                |                                                  |            |                                                                 |                                                                                                                                                                                                                                                                                                                                                                                                                                                                                                              |
| Earthworm ( <i>Eisenia fetida</i> ) | Frupica 50 WP  | Mixed with soil as a solution / 10%              | Chronic    | Reproduction                                                    | NOEC = 230 mg prep./kg d.w.soil (= 113 mg a.s./kg d.w. soil)<br>NOEC <sub>CORR</sub> = 115 mg prep./kg d.w.soil (= 56.5 mg a.s./kg d.w. soil)                                                                                                                                                                                                                                                                                                                                                                |
| Other soil macroorganisms           |                |                                                  |            |                                                                 |                                                                                                                                                                                                                                                                                                                                                                                                                                                                                                              |
| <i>Folsomia candida</i>             | Mepanipyrim    | Mixed with soil as a solution / 5%               | Chronic    | Mortality:<br><br><br><br><br><br><br><br><br><br>Reproduction: | LC <sub>10</sub> = 73.52 mg a.s./kg d.w. soil<br>LC <sub>10, CORR</sub> = 36.76 mg a.s./kg d.w. soil<br>LC <sub>20</sub> = 341.79 mg a.s./kg d.w. soil<br>LC <sub>20, CORR</sub> = 170.90 mg a.s./kg d.w. soil<br>NOEC = 104.98 mg a.s./kg d.w. soil<br>NOEC <sub>CORR</sub> = 52.49 mg a.s./kg d.w. soil<br><br>EC <sub>10</sub> = 67.69 mg a.s./kg d.w. soil<br>EC <sub>10, CORR</sub> = 33.85 mg a.s./kg d.w. soil<br>EC <sub>20</sub> = 131.90 mg a.s./kg d.w. soil<br>EC <sub>20, CORR</sub> = 65.95 mg |

| Test organism              | Test substance | Application method of test a.s./ OM <sup>1</sup> | Time scale | End point    | Toxicity                                                                                                          |
|----------------------------|----------------|--------------------------------------------------|------------|--------------|-------------------------------------------------------------------------------------------------------------------|
|                            |                |                                                  |            |              | a.s./kg d.w. soil<br>NOEC = 58.35 mg<br>a.s./kg d.w. soil<br>NOEC <sub>CORR</sub> = 29.18<br>mg a.s./kg d.w. soil |
| <i>Hypoaspis aculeifer</i> | a.s.           | Mixed with soil as a solution / 5%               |            | Reproduction | NOEC = 1000 mg<br>a.s./kg soil d.w.<br>NOEC <sub>CORR</sub> = 500 mg<br>a.s./kg soil d.w.                         |

<sup>1</sup>To indicate whether the test substance was oversprayed/to indicate the organic content of the test soil (e.g. 5 % or 10 %).

Higher tier testing (e.g. modelling or field studies); *None*

|                         |               |                                                                                  |                                                                                                                                                                                       |
|-------------------------|---------------|----------------------------------------------------------------------------------|---------------------------------------------------------------------------------------------------------------------------------------------------------------------------------------|
| Nitrogen transformation | Mepanipyrim   | Maximum tested rate of 5.2 mg a.s./kg d.w. soil; sandy loam soil                 | 6.96 % effect at day 21 at 5.2 mg a.s./kg d.w.soil<br><br>[In line with the OECD test guideline the endpoint should be based on nitrogen transformation rate and not nitrogen levels] |
|                         | Mepanipyrim   | Maximum tested rate of 3.335 mg a.s./kg d.w. soil; sandy loam and clay loam soil | Sandy loam soil: 20.2% effect at day 28 at 3.335 mg a.s./kg d.w. soil<br>Clay soil : 14.2 % effect at day 70 at 3.335 mg a.s./kg d.w. soil                                            |
|                         | Frupica 50 WP | Maximum tested rate of 2.7 mg a.s./kg d.w. soil; Sandy loam soil                 | 5.55 % effect at day 81 at 2.7 mg a.s./kg d.w.soil                                                                                                                                    |

### Toxicity/exposure ratios for soil organisms

#### Grapevines at BBCH 77-89, 1 x 600 g a.s./ha

| Test organism              | Test substance | Time scale | Soil PEC <sup>1</sup> | TER   | Trigger |
|----------------------------|----------------|------------|-----------------------|-------|---------|
| Earthworms                 |                |            |                       |       |         |
| <i>Eisenia fetida</i>      | Frupica 50 WP  | Chronic    | 0.252                 | 224   | 5       |
| Other soil macroorganisms  |                |            |                       |       |         |
| <i>Folsomia candida</i>    | Mepanipyrim    | Chronic    | 0.252                 | 115.8 | 5       |
| <i>Hypoaspis aculeifer</i> | Mepanipyrim    | Chronic    | 0.252                 | 1984  | 5       |

<sup>1</sup>maximum PEC soil was used



**Strawberries at BBCH 60-89, 2 x 400 g a.s./ha (7 day interval) (both indoor and outdoor use)**

| Test organism              | Test substance | Time scale | Soil PEC <sup>1</sup> | TER   | Trigger |
|----------------------------|----------------|------------|-----------------------|-------|---------|
| Earthworms                 |                |            |                       |       |         |
| <i>Eisenia fetida</i>      | Frupica 50 WP  | Chronic    | 0.434                 | 130   | 5       |
| Other soil macroorganisms  |                |            |                       |       |         |
| <i>Folsomia candida</i>    | Mepanipyrim    | Chronic    | 0.434                 | 67.22 | 5       |
| <i>Hypoaspis aculeifer</i> | Mepanipyrim    | Chronic    | 0.434                 | 1152  | 5       |

<sup>1</sup>maximum PEC soil was used**Tomatoes at BBCH 61-89, 2 x 400 g a.s./ha (7 day interval) (both indoor and outdoor use)**

| Test organism              | Test substance | Time scale | Soil PEC <sup>1</sup> | TER    | Trigger |
|----------------------------|----------------|------------|-----------------------|--------|---------|
| Earthworms                 |                |            |                       |        |         |
| <i>Eisenia fetida</i>      | Frupica 50 WP  | Chronic    | 0.217                 | 260    | 5       |
| Other soil macroorganisms  |                |            |                       |        |         |
| <i>Folsomia candida</i>    | Mepanipyrim    | Chronic    | 0.217                 | 134.45 | 5       |
| <i>Hypoaspis aculeifer</i> | Mepanipyrim    | Chronic    | 0.217                 | 2304   | 5       |

<sup>1</sup>maximum PEC soil was used**Effects on terrestrial non target higher plants (Regulation (EU) N° 283/2013, Annex Part A, point 8.6 and Regulation (EU) N° 284/2013 Annex Part A, point 10.6)**

## Screening data

|                                                      |
|------------------------------------------------------|
| Not provided as ER <sub>50</sub> tests are available |
|------------------------------------------------------|

## Laboratory dose response tests

| Species                                                                                                                                                                                                  | Test substance   | ER <sub>50</sub> (g/ha) <sup>2</sup><br>vegetative<br>vigour | ER <sub>50</sub> (g/ha) <sup>2</sup><br>emergence | Exposure <sup>1</sup><br>(g/ha) <sup>2</sup> | TER                           | Trigger |
|----------------------------------------------------------------------------------------------------------------------------------------------------------------------------------------------------------|------------------|--------------------------------------------------------------|---------------------------------------------------|----------------------------------------------|-------------------------------|---------|
| <b>Zea mais (maize),<br/>Allium cepa<br/>(onion), Brassica<br/>napus (oilseed<br/>rape), Cucumis<br/>sativa (cucumber),<br/>Helianthus<br/>annuus<br/>(sunflower),<br/>Phaseolus<br/>vulgaris (bean)</b> | Frupica 50<br>WP | > 780.96                                                     | > 780.96                                          | 1) 48.12<br>2) 11.08<br>3) 11.08             | 1) 16.2<br>2) 70.5<br>3) 70.5 | 5       |

Extended laboratory studies: *None*Semi-field and field test: *None*

Note: 1) For the use in grapevines; 2) for the use in strawberry (both indoor and outdoor); 3) for the use in tomato (both indoor and outdoor)

<sup>1</sup> Exposure has been estimated based on Ganzelmeier drift data with a standard drift distance of 1 meter for Strawberry and Tomato and 3 meters for Grapevines<sup>2</sup> dose is expressed as g a.s./ha

**Effects on biological methods for sewage treatment (Regulation (EU) N° 283/2013, Annex Part A, point 8.8)**

|                       |                                  |
|-----------------------|----------------------------------|
| Test type/organism    | end point                        |
| Activated sludge      | EC <sub>50</sub> > 100 mg a.s./L |
| <i>Pseudomonas sp</i> | No data available                |

**Monitoring data (Regulation (EU) N° 283/2013, Annex Part A, point 8.9 and Regulation (EU) N° 284/2013, Annex Part A, point 10.8)**

|                   |
|-------------------|
| No data available |
|-------------------|

**Definition of the residue for monitoring (Regulation (EU) N° 283/2013, Annex Part A, point 7.4.2) Ecotoxicologically relevant compounds<sup>1</sup>**

|             |                      |
|-------------|----------------------|
| Compartment |                      |
| soil        | Parent (mepanipyrim) |
| water       | Parent (mepanipyrim) |
| sediment    | Parent (mepanipyrim) |
| groundwater | Parent (mepanipyrim) |

<sup>1</sup> metabolites are considered relevant when, based on the risk assessment, they pose a risk comparable or higher than the parent

**Classification and labelling with regard to ecotoxicological data (Regulation (EU) N° 283/2013, Annex Part A, Section 10)**

|                                                                                                                                                                                                 |                                                                                                                                                                                                            |
|-------------------------------------------------------------------------------------------------------------------------------------------------------------------------------------------------|------------------------------------------------------------------------------------------------------------------------------------------------------------------------------------------------------------|
| Substance                                                                                                                                                                                       | Mepanipyrim                                                                                                                                                                                                |
| Harmonised classification according to Regulation (EC) No 1272/2008 and its Adaptations to Technical Process [Table 3.1 of Annex VI of Regulation (EC) No 1272/2008 as amended] <sup>11</sup> : | H400<br>H410                                                                                                                                                                                               |
| Peer review proposal <sup>12</sup> for harmonised classification according to Regulation (EC) No 1272/2008:                                                                                     | <p>Category Acute 1   Endpoint: 0.63 mg/L [48h EC50 Daphnia magna]<br/>H400 (M-factor = 1)</p> <p>Category chronic 1   Endpoint: 0.027 mg/L [Chronic NOEC Oncorhynchus mykiss]<br/>H410 (M-factor = 1)</p> |

<sup>11</sup> Regulation (EC) No 1272/2008 of the European Parliament and of the Council of 16 December 2008 on classification, labelling and packaging of substances and mixtures, amending and repealing Directives 67/548/EEC and 1999/45/EC, and amending Regulation (EC) No 1907/2006. OJ L 353, 31.12.2008, 1-1355.

<sup>12</sup> It should be noted that harmonised classification and labelling is formally proposed and decided in accordance with Regulation (EC) No 1272/2008.

## Abbreviations

|                   |                                                                   |
|-------------------|-------------------------------------------------------------------|
| 1/ <i>n</i>       | slope of Freundlich isotherm                                      |
| $\lambda$         | wavelength                                                        |
| $\epsilon$        | decadic molar extinction coefficient                              |
| a.s.              | active substance                                                  |
| AChE              | acetylcholinesterase                                              |
| ADE               | actual dermal exposure                                            |
| ADI               | acceptable daily intake                                           |
| AF                | assessment factor                                                 |
| AAOEL             | acute acceptable operator exposure level                          |
| AOEL              | acceptable operator exposure level                                |
| AP                | alkaline phosphatase                                              |
| AR                | applied radioactivity                                             |
| ARfD              | acute reference dose                                              |
| AST               | aspartate aminotransferase (SGOT)                                 |
| AUC               | area under the blood concentration/time curve                     |
| AV                | avoidance factor                                                  |
| BCF               | bioconcentration factor                                           |
| BUN               | blood urea nitrogen                                               |
| bw                | body weight                                                       |
| CAS               | Chemical Abstracts Service                                        |
| CFU               | colony-forming units                                              |
| ChE               | cholinesterase                                                    |
| CI                | confidence interval                                               |
| CIPAC             | Collaborative International Pesticides Analytical Council Limited |
| CL                | confidence limits                                                 |
| C <sub>max</sub>  | concentration achieved at peak blood level                        |
| DAA               | days after application                                            |
| DAT               | days after treatment                                              |
| DDD               | daily dietary dose                                                |
| DM                | dry matter                                                        |
| DT <sub>50</sub>  | period required for 50% dissipation (define method of estimation) |
| DT <sub>90</sub>  | period required for 90% dissipation (define method of estimation) |
| dw                | dry weight                                                        |
| EbC <sub>50</sub> | effective concentration (biomass)                                 |
| EC <sub>50</sub>  | effective concentration                                           |
| ECHA              | European Chemicals Agency                                         |

|                       |                                                                                                                                                     |
|-----------------------|-----------------------------------------------------------------------------------------------------------------------------------------------------|
| EEC                   | European Economic Community                                                                                                                         |
| EMDI                  | estimated maximum daily intake                                                                                                                      |
| ER <sub>50</sub>      | emergence rate/effective rate, median                                                                                                               |
| ErC <sub>50</sub>     | effective concentration (growth rate)                                                                                                               |
| ETR                   | exposure toxicity ratio                                                                                                                             |
| ETR <sub>acute</sub>  | exposure toxicity ratio for acute exposure                                                                                                          |
| ETR <sub>larvae</sub> | exposure toxicity ratio for chronic exposure                                                                                                        |
| ETR <sub>larvae</sub> | exposure toxicity ratio for larvae                                                                                                                  |
| ETR <sub>HPG</sub>    | exposure toxicity ratio for effects on honeybee hypopharygeal glands                                                                                |
| EU                    | European Union                                                                                                                                      |
| EUROPOEM              | European Predictive Operator Exposure Model                                                                                                         |
| f(twa)                | Time-weighted average factor                                                                                                                        |
| FAO                   | Food and Agriculture Organization of the United Nations                                                                                             |
| FID                   | flame ionisation detector                                                                                                                           |
| FIR                   | food intake rate                                                                                                                                    |
| FOB                   | functional observation battery                                                                                                                      |
| FOCUS                 | Forum for the Co-ordination of Pesticide Fate Models and their Use                                                                                  |
| GAP                   | Good Agricultural Practice                                                                                                                          |
| GC                    | gas chromatography                                                                                                                                  |
| GCPF                  | Global Crop Protection Federation (formerly known as International Group of National Associations of Manufacturers of Agrochemical Products; GIFAP) |
| GGT                   | gamma glutamyl transferase                                                                                                                          |
| GM                    | geometric mean                                                                                                                                      |
| GS                    | growth stage                                                                                                                                        |
| GSH                   | glutathione                                                                                                                                         |
| Hb                    | haemoglobin                                                                                                                                         |
| Hct                   | haematocrit                                                                                                                                         |
| HPLC                  | high-pressure liquid chromatography<br>or high-performance liquid chromatography                                                                    |
| HPLC-MS               | high-pressure liquid chromatography–mass spectrometry                                                                                               |
| HPG                   | hypopharygeal glands                                                                                                                                |
| HQ                    | hazard quotient                                                                                                                                     |
| HQ <sub>contact</sub> | hazard quotient for contact exposure                                                                                                                |
| HR                    | hazard rate                                                                                                                                         |
| IEDI                  | international estimated daily intake                                                                                                                |
| IESTI                 | international estimated short-term intake                                                                                                           |
| ISO                   | International Organization for Standardization                                                                                                      |
| IUPAC                 | International Union of Pure and Applied Chemistry                                                                                                   |
| iv                    | intravenous                                                                                                                                         |

|                    |                                                                                                                                                                                  |
|--------------------|----------------------------------------------------------------------------------------------------------------------------------------------------------------------------------|
| JMPR               | Joint Meeting of the FAO Panel of Experts on Pesticide Residues in Food and the Environment and the WHO Expert Group on Pesticide Residues (Joint Meeting on Pesticide Residues) |
| $K_{doc}$          | organic carbon linear adsorption coefficient                                                                                                                                     |
| $K_{Foc}$          | Freundlich organic carbon adsorption coefficient                                                                                                                                 |
| LC                 | liquid chromatography                                                                                                                                                            |
| LC <sub>50</sub>   | lethal concentration, median                                                                                                                                                     |
| LC-MS              | liquid chromatography–mass spectrometry                                                                                                                                          |
| LC-MS-MS           | liquid chromatography with tandem mass spectrometry                                                                                                                              |
| LD <sub>50</sub>   | lethal dose, median; dosis letalis media                                                                                                                                         |
| LDD <sub>50</sub>  | lethal dietary dose; median                                                                                                                                                      |
| LDH                | lactate dehydrogenase                                                                                                                                                            |
| LOAEL              | lowest observable adverse effect level                                                                                                                                           |
| LOD                | limit of detection                                                                                                                                                               |
| LOQ                | limit of quantification                                                                                                                                                          |
| M/L                | mixing and loading                                                                                                                                                               |
| MAF                | multiple application factor                                                                                                                                                      |
| MCH                | mean corpuscular haemoglobin                                                                                                                                                     |
| MCHC               | mean corpuscular haemoglobin concentration                                                                                                                                       |
| MCV                | mean corpuscular volume                                                                                                                                                          |
| mm                 | millimetre (also used for mean measured concentrations)                                                                                                                          |
| mN                 | milli-newton                                                                                                                                                                     |
| MRL                | maximum residue level                                                                                                                                                            |
| MS                 | mass spectrometry                                                                                                                                                                |
| MSDS               | material safety data sheet                                                                                                                                                       |
| MTD                | maximum tolerated dose                                                                                                                                                           |
| MWHC               | maximum water-holding capacity                                                                                                                                                   |
| NESTI              | national estimated short-term intake                                                                                                                                             |
| NOAEC              | no observed adverse effect concentration                                                                                                                                         |
| NOAEL              | no observed adverse effect level                                                                                                                                                 |
| NOEC               | no observed effect concentration                                                                                                                                                 |
| NOEL               | no observed effect level                                                                                                                                                         |
| NPD                | nitrogen–phosphorus detector                                                                                                                                                     |
| OECD               | Organisation for Economic Co-operation and Development                                                                                                                           |
| OM                 | organic matter content                                                                                                                                                           |
| Pa                 | pascal                                                                                                                                                                           |
| PD                 | proportion of different food types                                                                                                                                               |
| PEC                | predicted environmental concentration                                                                                                                                            |
| PEC <sub>air</sub> | predicted environmental concentration in air                                                                                                                                     |

|                     |                                                                  |
|---------------------|------------------------------------------------------------------|
| PEC <sub>gw</sub>   | predicted environmental concentration in groundwater             |
| PEC <sub>sed</sub>  | predicted environmental concentration in sediment                |
| PEC <sub>soil</sub> | predicted environmental concentration in soil                    |
| PEC <sub>sw</sub>   | predicted environmental concentration in surface water           |
| PHED                | pesticide handler's exposure data                                |
| PHI                 | pre-harvest interval                                             |
| PIE                 | potential inhalation exposure                                    |
| pK <sub>a</sub>     | negative logarithm (to the base 10) of the dissociation constant |
| P <sub>ow</sub>     | partition coefficient between <i>n</i> -octanol and water        |
| PPE                 | personal protective equipment                                    |
| ppm                 | parts per million (10 <sup>-6</sup> )                            |
| PT                  | proportion of diet obtained in the treated area                  |
| PTT                 | partial thromboplastin time                                      |
| QSAR                | quantitative structure–activity relationship                     |
| r <sup>2</sup>      | coefficient of determination                                     |
| RPE                 | respiratory protective equipment                                 |
| RUD                 | residue per unit dose                                            |
| SC                  | suspension concentrate                                           |
| SD                  | standard deviation                                               |
| SFO                 | single first-order                                               |
| SMILES              | simplified molecular-input line-entry system                     |
| SPG                 | specific protection goal                                         |
| SSD                 | species sensitivity distribution                                 |
| STMR                | supervised trials median residue                                 |
| t <sub>1/2</sub>    | half-life (define method of estimation)                          |
| TER                 | toxicity exposure ratio                                          |
| TER <sub>A</sub>    | toxicity exposure ratio for acute exposure                       |
| TER <sub>LT</sub>   | toxicity exposure ratio following chronic exposure               |
| TER <sub>ST</sub>   | toxicity exposure ratio following repeated exposure              |
| TK                  | technical concentrate                                            |
| TLV                 | threshold limit value                                            |
| Tmax                | time until peak blood levels achieved                            |
| TMDI                | theoretical maximum daily intake                                 |
| TRR                 | total radioactive residue                                        |
| TSH                 | thyroid-stimulating hormone (thyrotropin)                        |
| TWA                 | time-weighted average                                            |
| UDS                 | unscheduled DNA synthesis                                        |
| UF                  | uncertainty factor                                               |

|     |                           |
|-----|---------------------------|
| UV  | ultraviolet               |
| W/S | water/sediment            |
| w/v | weight per unit volume    |
| w/w | weight per unit weight    |
| WBC | white blood cell          |
| WG  | water-dispersible granule |
| WHO | World Health Organization |
